# Supplementary material for: Synthesis of 4-ethenyl quinazolines via rhodium(iii)-catalyzed [5 + 1] annulation reaction of N-arylamidines with cyclopropenones
Source: Royal Society of Chemistry journal article supplement (doi:10.1039/c9qo01372e), 2020-01-01

## Supporting Information

### Synthesis of 4-ethenyl Quinazolines *via* Rhodium(III)-Catalyzed [5+1]

### Annulation Reaction of *N*-arylamidines with Cyclopropenones

Hui-min Xing, Jian Chen, Yue-sen Shi, Tian-le Huang, Li Hai\* and Yong Wu\*

*Key Laboratory of Drug-Targeting of Education Ministry and Department of Medicinal Chemistry, West China School of Pharmacy, Sichuan University, Chengdu, 610041, P. R. of China. Email: wyong@scu.edu.cn (Y. Wu); Fax: +86 02885506666*

## Table of Contents

|                                                                                                     |           |
|-----------------------------------------------------------------------------------------------------|-----------|
| <b>I. General Information</b> .....                                                                 | <b>2</b>  |
| <b>II. Experimental Information</b> .....                                                           | <b>2</b>  |
| (a) Optimization of the reaction conditions .....                                                   | 2         |
| (b) General procedure for the synthesis of imidamides <b>1</b> ( <b>1a</b> as an example).....      | 3         |
| (c) General procedure for the synthesis of cyclopropenone <b>2</b> ( <b>2a</b> as an example) ..... | 3         |
| (d) General procedure for the synthesis of products <b>3</b> ( <b>3aa</b> as an example).....       | 3         |
| (e) General procedure for the synthesis of products <b>4</b> ( <b>4aa</b> as an example) .....      | 4         |
| <b>III. Mechanistic studies</b> .....                                                               | <b>4</b>  |
| (a) Ortho deuteration experiment .....                                                              | 4         |
| (b) Kinetic isotope effect experiments (KIE).....                                                   | 4         |
| (c) Competition experiments .....                                                                   | 5         |
| (d) Oxidation control experiments .....                                                             | 5         |
| <b>IV. Z/E Configuration</b> .....                                                                  | <b>6</b>  |
| <b>V. Product Transformations</b> .....                                                             | <b>7</b>  |
| <b>VI. Characterization Data of Products</b> .....                                                  | <b>8</b>  |
| <b>VII. References</b> .....                                                                        | <b>21</b> |
| <b>VIII. NMR Spectra of Coupled Products</b> .....                                                  | <b>22</b> |

## I. General Information

Unless otherwise noted, materials were purchased from commercial suppliers and used without further purification. Except for the specially mentioned dry solvent, all the solvents were treated according to general methods. All the reactions were monitored by thin-layer chromatography (TLC) and were visualized using UV light. The product purification was done using silica gel column chromatography. Thin-layer chromatography (TLC) characterization was performed with precoated silica gel GF254 (0.2 mm), while column chromatography characterization was performed with silica gel (100-200 mesh).  $^1\text{H}$  NMR,  $^{13}\text{C}$  NMR and  $^{19}\text{F}$  NMR spectra were recorded with tetramethylsilane (TMS,  $\delta = 0.00$  ppm) as the internal standard.  $^1\text{H}$  NMR spectra were recorded at 400 or 600 MHz (Varian),  $^{13}\text{C}$  NMR spectra were recorded at 100 or 150 MHz (Varian) and  $^{19}\text{F}$  NMR spectra were recorded at 376 MHz (Varian). Chemical shifts are reported in ppm downfield from  $\text{CDCl}_3$  ( $\delta = 7.26$  ppm) or  $\text{DMSO-d}_6$  ( $\delta = 2.50$  ppm;  $\text{H}_2\text{O}$  signal was found at  $\delta = 3.34$  ppm) for  $^1\text{H}$  NMR and chemical shifts for  $^{13}\text{C}$  NMR spectra are reported in ppm relative to the central  $\text{CDCl}_3$  ( $\delta = 77.0$  ppm) or  $\text{DMSO-d}_6$  ( $\delta = 39.6$  ppm). Coupling constants were given in Hz. The following notations were used: br-broad, s-singlet, d-doublet, t-triplet, q-quartet, m-multiplet, dd-doublet of doublet, dt-doublet of triplet, td-triplet of doublet, ddd-doublet of doublet of doublet. Melting points were measured with YRT-3 melting point apparatus (Shantou Keyi Instrument & Equipment Co., Ltd., Shantou, China).

## II. Experimental Information

### (a) Optimization of the reaction conditions

Table SI<sub>1</sub>. Optimization of the Reaction Conditions<sup>a</sup>

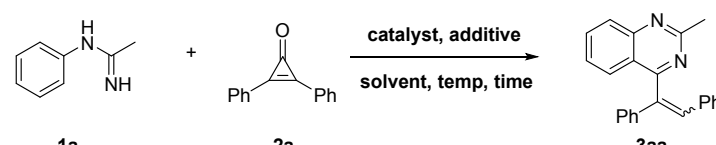

| Entry | Catalyst System (mol%)                                     | Additive                  | Solvent         | Yield <sup>b</sup> (%) |
|-------|------------------------------------------------------------|---------------------------|-----------------|------------------------|
| 1     | $[\text{Cp}^*\text{RhCl}_2]_2$ (5) / $\text{AgSbF}_6$ (50) | HOAc                      | DCM             | 10                     |
| 2     | $[\text{Cp}^*\text{RhCl}_2]_2$ (5) / $\text{AgSbF}_6$ (50) | NaOAc                     | DCM             | <5                     |
| 3     | $[\text{Cp}^*\text{RhCl}_2]_2$ (5) / $\text{AgSbF}_6$ (50) | $\text{Cu}(\text{OAc})_2$ | DCM             | <5                     |
| 4     | $[\text{Cp}^*\text{RhCl}_2]_2$ (5) / $\text{AgSbF}_6$ (50) | /                         | DCE             | 75                     |
| 5     | $[\text{Cp}^*\text{RhCl}_2]_2$ (5) / $\text{AgSbF}_6$ (50) | /                         | HFIP            | 56                     |
| 6     | $[\text{Cp}^*\text{RhCl}_2]_2$ (5) / $\text{AgSbF}_6$ (50) | /                         | DME             | 24                     |
| 7     | $[\text{Cp}^*\text{RhCl}_2]_2$ (5) / $\text{AgSbF}_6$ (50) | /                         | PhCl:PhMe = 1:1 | 65                     |

<sup>a</sup> Reactions conditions: **1a** (1.2 mmol), **2a** (1.0 mmol),  $[\text{Cp}^*\text{RhCl}_2]_2$  (5 mol%),  $\text{AgSbF}_6$  (50 mol%), additive (1.0 mmol), solvent (1.0 ml), 100 °C, 36 h, sealed tube under  $\text{O}_2$ .<sup>b</sup> Total isolated yield of the mixture after chromatography.

Table SI<sub>2</sub>. Optimization of the Reaction Conditions<sup>a</sup>

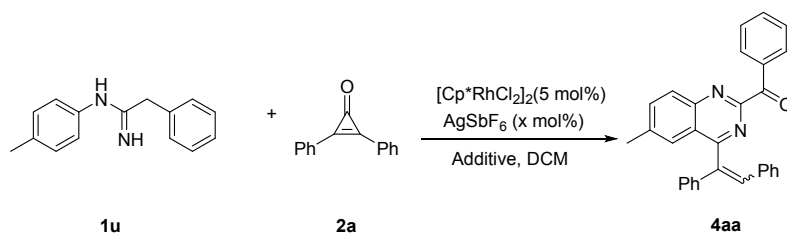

| Entry          | Catalyst System (mol%)                                              | Additive                                     | Solvent | Yield <sup>b</sup><br>(%) |
|----------------|---------------------------------------------------------------------|----------------------------------------------|---------|---------------------------|
| 1              | [Cp*RhCl <sub>2</sub> ] <sub>2</sub> (5) / AgSbF <sub>6</sub> (50)  | /                                            | DCM     | 30                        |
| 2              | [Cp*RhCl <sub>2</sub> ] <sub>2</sub> (5) / AgSbF <sub>6</sub> (70)  | /                                            | DCM     | 45                        |
| 3              | [Cp*RhCl <sub>2</sub> ] <sub>2</sub> (5) / AgSbF <sub>6</sub> (100) | /                                            | DCM     | 40                        |
| 4 <sup>c</sup> | [Cp*RhCl <sub>2</sub> ] <sub>2</sub> (5) / AgSbF <sub>6</sub> (70)  | /                                            | DCM     | 44                        |
| 5 <sup>d</sup> | [Cp*RhCl <sub>2</sub> ] <sub>2</sub> (5) / AgSbF <sub>6</sub> (70)  | /                                            | DCM     | 47                        |
| 6              | [Cp*RhCl <sub>2</sub> ] <sub>2</sub> (5) / AgSbF <sub>6</sub> (70)  | NaOAc                                        | DCM     | 33                        |
| 7              | [Cp*RhCl <sub>2</sub> ] <sub>2</sub> (5) / AgSbF <sub>6</sub> (70)  | t-BuOK                                       | DCM     | 11                        |
| 8              | [Cp*RhCl <sub>2</sub> ] <sub>2</sub> (5) / AgSbF <sub>6</sub> (70)  | DBU                                          | DCM     | <5                        |
| 9              | [Cp*RhCl <sub>2</sub> ] <sub>2</sub> (5) / AgSbF <sub>6</sub> (70)  | HOAc                                         | DCM     | 34                        |
| 10             | [Cp*RhCl <sub>2</sub> ] <sub>2</sub> (5) / AgSbF <sub>6</sub> (70)  | AdCOOH                                       | DCM     | <5                        |
| 11             | [Cp*RhCl <sub>2</sub> ] <sub>2</sub> (5) / AgSbF <sub>6</sub> (70)  | <i>m</i> -CPBA <sup>e</sup>                  | DCM     | 35                        |
| 12             | [Cp*RhCl <sub>2</sub> ] <sub>2</sub> (5) / AgSbF <sub>6</sub> (70)  | TBHP <sup>f</sup>                            | DCM     | N.R. <sup>g</sup>         |
| 13             | [Cp*RhCl <sub>2</sub> ] <sub>2</sub> (5) / AgSbF <sub>6</sub> (70)  | DMSO                                         | DCM     | <5                        |
| 14             | [Cp*RhCl <sub>2</sub> ] <sub>2</sub> (5) / AgSbF <sub>6</sub> (70)  | K <sub>2</sub> S <sub>2</sub> O <sub>8</sub> | DCM     | 10                        |

<sup>a</sup> Reactions conditions: **1u** (1.2 mmol), **2a** (1.0 mmol), [Cp\*RhCl<sub>2</sub>]<sub>2</sub> (5 mol%), AgSbF<sub>6</sub> (x mol%), additive (1.0 mmol), DCM (1.0 ml), sealed tube under O<sub>2</sub>. <sup>b</sup> Total isolated yield of the mixture after chromatography. <sup>c</sup> Temp. = 120 °C. <sup>d</sup> Stirred for 40 h. <sup>e</sup> *m*-CPBA = 3-Chloroperbenzoic acid. <sup>f</sup> TBHP = tert-Butylhydroperoxide. <sup>g</sup> N.R. = No Reaction

### (b) General procedure for the synthesis of imidamides **1** (**1a** as an example)<sup>1</sup>

A mixture of aniline (1.0 equiv.), AlCl<sub>3</sub> (1.2 equiv.) and carbonitrile (2.0 equiv.) was stirred at 120 °C in a sealed reaction tube overnight. After completion of the reaction, a concentrated NaOH solution in a mixture of water and ice was added into the residual crude product and stirred for about 15 minutes. Then the mixture was extracted with DCM (25 mL × 3). The combined organic layers were washed with brine (30 mL × 3), dried over anhydrous Na<sub>2</sub>SO<sub>4</sub> and evaporated under vacuum. The residue was purified by column chromatography on silica gel.

### (c) General procedure for the synthesis of cyclopropenone **2** (**2a** as an example)<sup>2</sup>

Substrate **2a** was synthesized according to the reported procedure.

### (d) General procedure for the synthesis of products **3** (**3aa** as an example).

N-phenylethanamide **1a** (0.12 mmol), cyclopropenone **2a** (0.10 mmol), [Cp\*RhCl<sub>2</sub>]<sub>2</sub> (0.05 mmol), and AgSbF<sub>6</sub> (0.5 mmol) were charged into a pressure tube,

to which was added DCM (1.0 mL) under O<sub>2</sub> atmosphere. The reaction mixture was stirred at 100 °C for 36 h. After cooled to rt, the solvent was removed under reduced pressure and the residue was purified by silica gel chromatography using PE/EA to afford compound **3aa** as a yellow solid.

**(e) General procedure for the synthesis of products 4 (4aa as an example).**

N-arylamidine **1u** (0.12 mmol), cyclopropenone **2a** (0.10 mmol), [Cp\**RhCl*<sub>2</sub>]<sub>2</sub> (0.05 mmol), and AgSbF<sub>6</sub> (0.7 mmol) were charged into a pressure tube, to which was added DCM (1.0 mL) under O<sub>2</sub> atmosphere. The reaction mixture was stirred at 100 °C for 40 h. After cooled to rt, the solvent was removed under reduced pressure and the residue was purified by silica gel chromatography using PE/EA to afford compound **4aa** as a yellow solid.

### III. Mechanistic Studies

**(a) Ortho deuteration experiment**

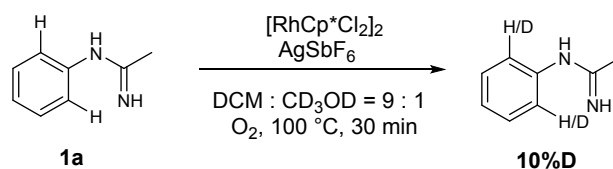

N-phenylethanamide **1a** (0.10 mmol) was dissolved in DCE (0.9 ml) / CD<sub>3</sub>OD (0.1 mL) in the presence of [Cp\**RhCl*<sub>2</sub>]<sub>2</sub> (5 mol%), AgSbF<sub>6</sub> (50 mol%) under O<sub>2</sub> atmosphere, and was stirred at 100 °C for 30 min. After cooling down, the volatiles were removed and the mixture was purified by flash chromatography of silica gel. The deuterium incorporation was estimated to be 10% at *ortho*-position by <sup>1</sup>H NMR analysis.

**Figure S1: The <sup>1</sup>H NMR (400MHz, Chloroform-*d*) of the mixture**

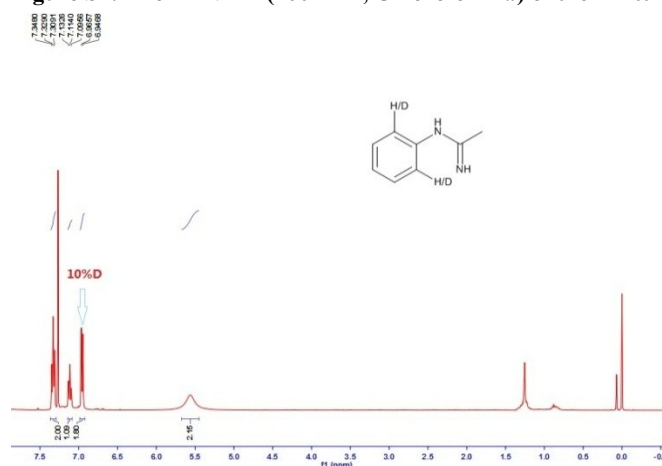

**(b) Kinetic isotope effect experiment (KIE)**

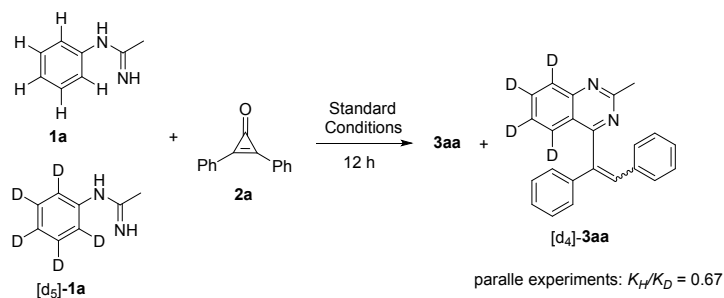

Two Schlenk tubes each was charged with N-arylamidine **1a** (0.12 mmol) or d<sub>5</sub>-**1a** (0.12 mmol). Cyclopropenone **2a** (0.10 mmol), [Cp\*RhCl<sub>2</sub>]<sub>2</sub> (0.05 mmol), AgSbF<sub>6</sub> (0.5 mmol), DCM (1.0 mL) were added to each tube under O<sub>2</sub> atmosphere, and the two reactions were stirred side-by-side at 100 °C for 10 h. After rapidly evaporating the two mixtures separately, the residues were purified by flash column chromatography on silica gel using PE/EA. The KIE value was determined to be  $k_H/k_D = 0.67$  on the yield ratio of **3aa** and d<sub>4</sub>-**3aa**, which indicated that the cleavage of the C-H bond is likely not involved in the rate-limiting step.

### (c) Competition experiments

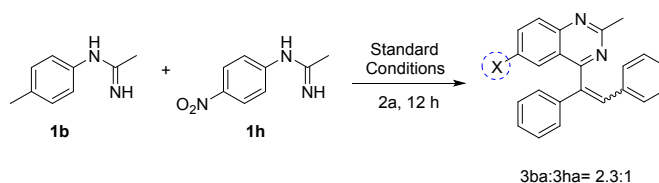

A mixture of N-arylamidine **1b** (0.12 mmol), **1h** (0.12 mmol), cyclopropenone **2a** (0.10 mmol), [Cp\*RhCl<sub>2</sub>]<sub>2</sub> (0.05 mmol), AgSbF<sub>6</sub> (0.5 mmol) were dissolved in DCM (1.0 mL) in a pressure tube under O<sub>2</sub> atmosphere. The reaction mixture was stirred at 100 °C for 10 h. After that, the solvent was removed under reduced pressure and the residue was purified by silica gel chromatography using PE/EA to afford **3ba** and **3ha** in a ratio 2.3:1.

### (d) Oxidation control experiments

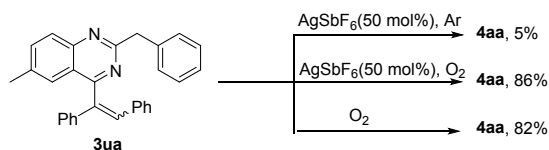

Three Schlenk tubes each was charged with the product **3ua** (0.10 mmol). The first one was added AgSbF<sub>6</sub> (0.5 mmol) under Ar atmosphere, the second one was added AgSbF<sub>6</sub> (0.5 mmol) under O<sub>2</sub> atmosphere, the last one was just under O<sub>2</sub> atmosphere without any additive. All of the reaction mixtures were dissolved in DCM (1.0 mL) and stirred at 100 °C for 24 h. After that, the solvents were removed under reduced pressure and the residues were purified by silica gel chromatography using PE/EA.

## IV. Z/E Configuration

Take 3ba as an example

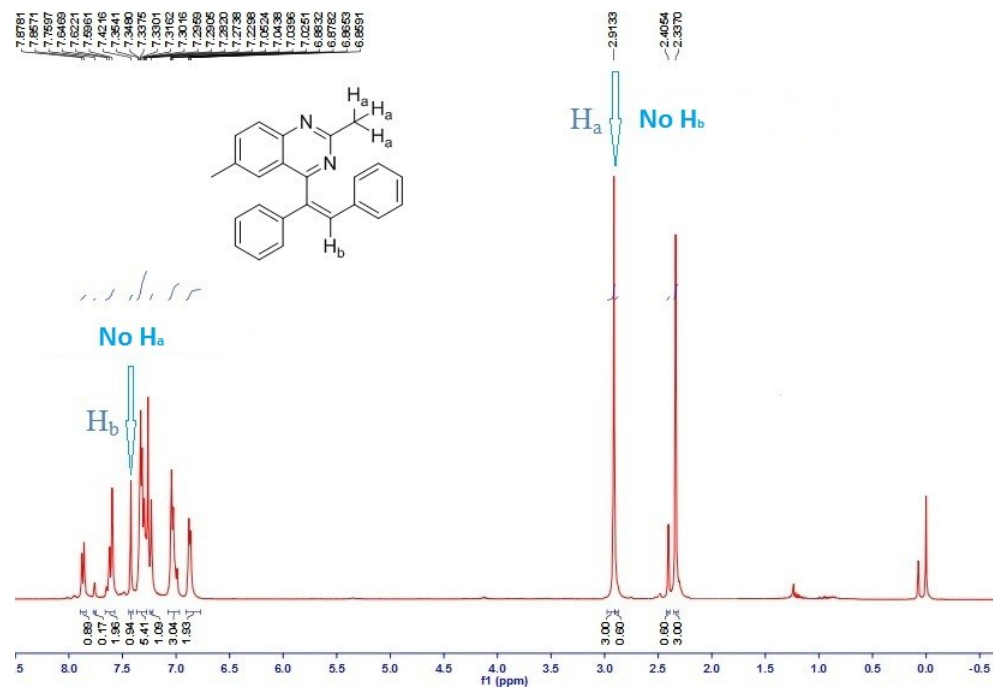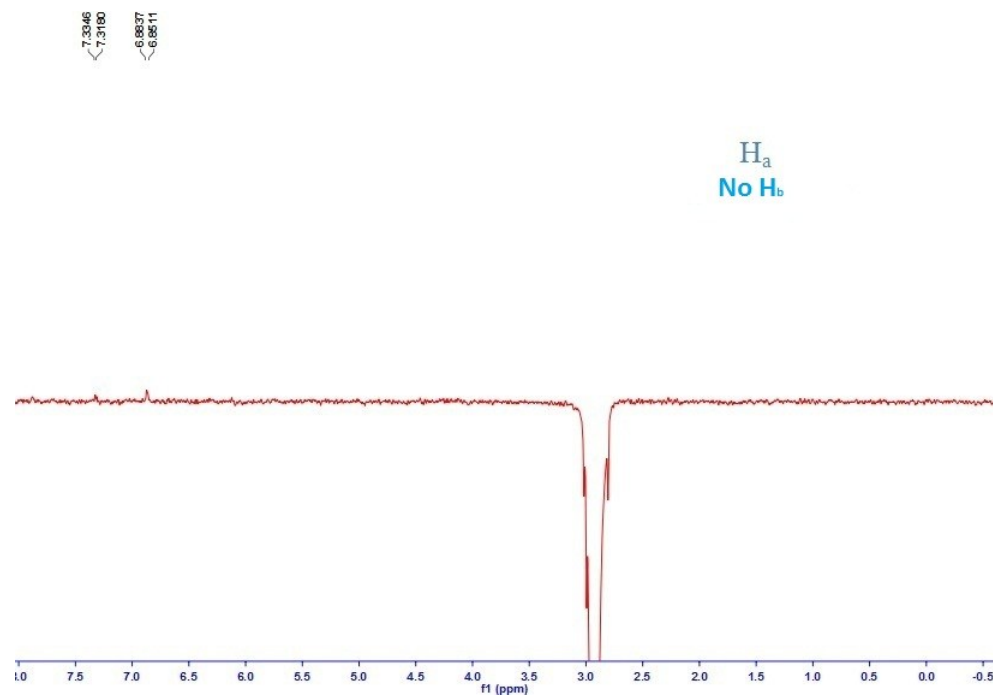

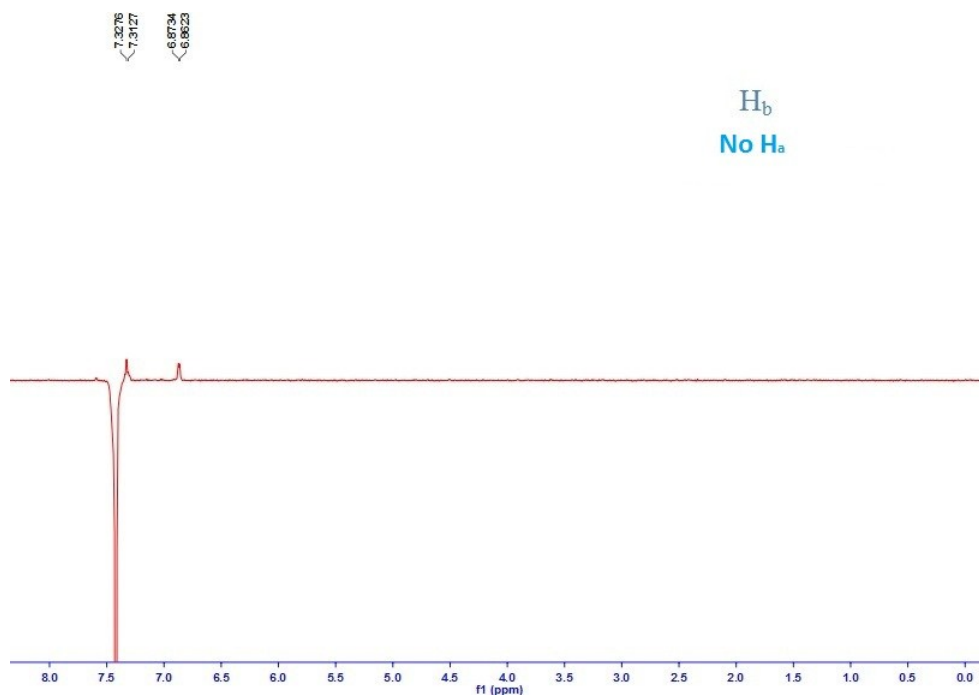

The characteristic of NOE signal of the product **3ba** showed that the *Z*-configuration product is favorable one.

## V. Product Transformations

### 4-(1,2-Diphenylethyl)-2,6-dimethylquinazoline (**5**)

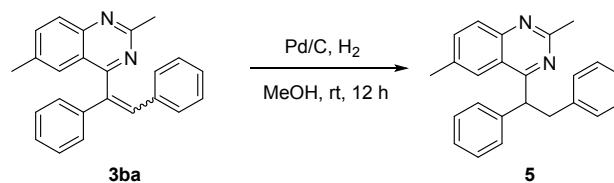

A vial equipped with a stir bar was charged with **3ba** (33.6 mg, 0.1 mmol, *Z/E* = 5:1), Pd/C (10 mg), and MeOH (2.0 mL) under a balloon of H<sub>2</sub> (1 atm), the reaction mixture was stirred for 12 h at room temperature. After the indicated time, the reaction mixture was filtered, the organic layers were combined and concentrated.<sup>3</sup> Purification by chromatography on silica gel afforded the title product **5** as a white solid (30.4 mg, 90%), mp: 98-100 °C. *R<sub>f</sub>* = 0.6 (PE/EA 5:1). **<sup>1</sup>H NMR (400 MHz, Chloroform-*d*)** δ 7.82-7.76 (m, 2H), 7.55 (dd, *J* = 8.4, 2.0 Hz, 1H), 7.36-7.31 (m, 2H), 7.24-7.20 (m, 2H), 7.19-7.12 (m, 3H), 7.11-7.05 (m, 3H), 5.05 (t, *J* = 7.2 Hz, 1H), 3.87-3.80 (m, 1H), 3.44-3.37 (m, 1H), 2.95 (s, 3H), 2.44 (s, 3H). **<sup>13</sup>C NMR (100 MHz, Chloroform-*d*)** δ 170.0, 162.6, 148.8, 142.1, 140.4, 136.5, 135.4, 129.3, 128.5, 128.2, 128.0, 127.8, 126.8, 125.9, 123.1, 121.7, 50.5, 41.5, 26.5, 21.9. **HRMS (ESI):** [M+H]<sup>+</sup> calculated for C<sub>24</sub>H<sub>22</sub>N<sub>2</sub>: 339.1856, found: 339.1857.

### 2-(2,6-Dimethylquinazolin-4-yl)-1,2-diphenylethen-1-ol (**6**)

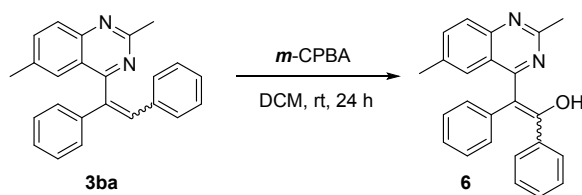

An oven-dried vial equipped with a stir bar was charged with **3ba** (33.6 mg, 0.1 mmol, *Z/E* = 5:1), *m*-chloroperbenzoic acid (34.5 mg, 0.2 mmol), and DCM (2.0 mL) under Ar. The reaction mixture was stirred for 24 h at room temperature. After the indicated time, the reaction mixture was quenched with NaHCO<sub>3</sub> (5 mL), and extracted with diethyl ether (10 × 3 mL). The organic layers were combined, washed with NaOH (1 N, 5 mL), and brine (5 mL), dried over anhydrous Na<sub>2</sub>SO<sub>4</sub> and concentrated.<sup>4</sup> Purification by chromatography on silica gel afforded the title product **6** as a yellow oil in a ratio 5:1 (25.3 mg, 72%). *R*<sub>f</sub> = 0.3 (PE/EA 2:1). <sup>1</sup>H NMR (400 MHz, Chloroform-*d*) δ 8.58 (d, *J* = 8.8 Hz, 1H), 7.67 (dd, *J* = 8.8, 1.6 Hz, 1H), 7.58 (s, 1H), 7.44 (s, 1H), 7.35-7.28 (m, 6H), 7.22 (s, 1H), 7.08-7.02 (m, 3H), 6.93-6.88 (m, 2H), 2.94 (s, 3H, *Z/E*-CH<sub>3</sub>C<sub>4</sub>N<sub>2</sub>), 2.35 (s, 3H, *Z/E*-CH<sub>3</sub>C<sub>6</sub>H<sub>3</sub>). <sup>13</sup>C NMR (100 MHz, Chloroform-*d*) δ 155.1, 153.0, 142.1, 140.5, 139.3, 136.6, 136.5, 135.7, 132.4, 129.8, 129.7, 128.8, 128.8, 128.7, 128.3, 128.2, 128.0, 127.8, 126.6, 125.7, 124.1, 118.7, 21.5, 20.3. HRMS (ESI): [M+H]<sup>+</sup> calculated for C<sub>24</sub>H<sub>20</sub>N<sub>2</sub>O: 353.1648, found: 353.1647.

#### (2,6-Dimethylquinazolin-4-yl)(phenyl)methanone (**7**)

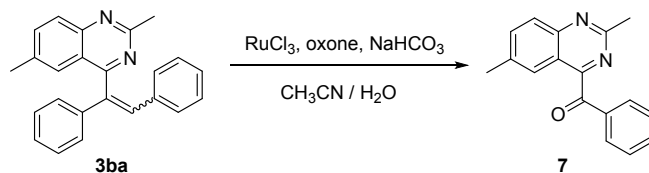

To a 10 mL vial was added RuCl<sub>3</sub> (0.82 mg, 4.0 mol%), Oxone (104.5 mg, 0.17 mmol), sodium bicarbonate (45.3 mg, 0.54 mmol), acetonitrile (1.5 mL), and water (1.0 mL) and **3ba** (33.6 mg, 0.1 mmol, *Z/E* = 5:1). The reaction was stirred at room temperature for 1 h. After the indicated time, the reaction mixture was poured into a separatory funnel along with EtOAc (30 mL) and water (10 mL). The organic layer was separated and washed with water (10 mL) and brine (10 mL). The organic layer was dried over anhydrous Na<sub>2</sub>SO<sub>4</sub>, filtered and concentrated.<sup>5</sup> Purification by chromatography on silica gel afforded the title product **7** as a yellow solid<sup>1b</sup> (23.3 mg, 89%), mp: 140-141 °C. *R*<sub>f</sub> = 0.6 (PE/EA 5:1).

#### (4-(1,2-Diphenylvinyl)-6-methylquinazolin-2-yl)(4-nitrophenyl)methanol (**8**)



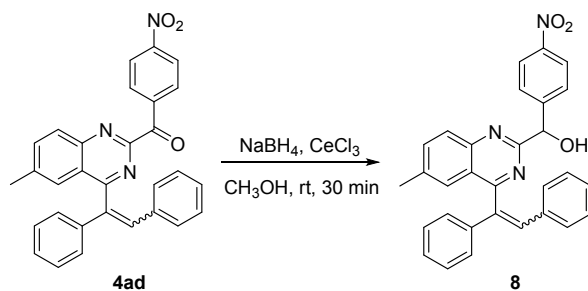

To a solution of **4ad** (47.1 mg, 0.1 mmol, *Z/E* = 1:1) and CeCl<sub>3</sub> (32.0 mg, 0.13 mmol) in MeOH (2 mL) was added NaBH<sub>4</sub> (4.5 mg, 0.12 mmol), and the mixture was stirred for 30 min at room temperature. After the indicated time, the mixture was quenched with water and extracted with EtOAc (20 × 3). The organic phase was dried with Na<sub>2</sub>SO<sub>4</sub>, filtered and concentrated under reduced pressure.<sup>6</sup> The residue was purified by silica gel chromatography using PE/EA to afford compound **8** as a yellow oil (41.2 mg, 87%), *Z/E* = 4:1. *R<sub>f</sub>* = 0.3 (PE/EA 5:1). **<sup>1</sup>H NMR (400 MHz, Chloroform-*d*)** δ 8.02 (d, *J* = 8.8 Hz, 2H), 7.95 (d, *J* = 8.8 Hz, 1H), 7.78-7.72 (m, 1H), 7.68-7.63 (m, 2H), 7.59 (s, 1H), 7.42 (s, 1H), 7.34-7.27 (m, 4H), 7.25-7.21 (m, 3H), 7.01-6.94 (m, 1H), 6.87 (t, *J* = 7.6 Hz, 2H), 6.69 (d, *J* = 7.6 Hz, 2H), 6.13 (s, 1H), 2.36 (s, 3H, *Z/E*-CH<sub>3</sub>C<sub>6</sub>H<sub>3</sub>). **<sup>13</sup>C NMR (100 MHz, Chloroform-*d*)** δ 169.8, 168.8, 163.5, 156.7, 149.9, 149.4, 149.3, 148.3, 147.2, 140.9, 140.5, 140.1, 139.9, 138.6, 137.7, 137.4, 137.2, 137.1, 136.1, 135.6, 132.8, 132.3, 132.0, 129.9, 129.7, 129.6, 128.9, 128.8, 128.7, 128.6, 128.5, 128.2, 128.1, 127.9, 127.8, 127.6, 127.4, 126.6, 126.4, 125.4, 125.3, 123.3, 123.1, 74.4, 21.8. **HRMS (ESI):** [M+H]<sup>+</sup> calculated for C<sub>30</sub>H<sub>23</sub>N<sub>3</sub>O<sub>3</sub>: 474.1812, found: 474.1810.

## VI. Characterization Date of Products

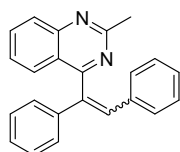

### 4-(1,2-Diphenylvinyl)-2-methylquinazoline (**3aa**)

Yellow solid (26.7 mg, 83%), mp: 147-150 °C, *Z/E* = 3:1. *R<sub>f</sub>* = 0.5 (PE/EA 5:1). **<sup>1</sup>H NMR (400 MHz, Chloroform-*d*)** δ 7.99 (d, *J* = 8.0 Hz, 2H), 7.85 (d, *J* = 8.0 Hz, 1H), 7.79 (t, *J* = 8.0 Hz, 2H), 7.43 (s, 1H), 7.40-7.27 (m, 7H), 7.23-7.17 (m, 2H), 7.07-6.97 (m, 3H), 6.87 (d, *J* = 6.0 Hz, 2H), 2.94 (s, 3H, *Z/E*-CH<sub>3</sub>C<sub>4</sub>N<sub>2</sub>). **<sup>13</sup>C NMR (100 MHz, Chloroform-*d*)** δ 168.8, 163.5, 149.9, 139.4, 137.5, 137.4, 136.1, 134.9, 134.8, 133.1, 132.7, 130.7, 128.8, 128.6, 127.9, 127.7, 127.6, 127.2, 127.1, 127.0, 126.9, 126.6, 126.1, 125.8, 125.6, 125.4, 120.9, 120.4, 25.6. **HRMS (ESI):** [M+H]<sup>+</sup> calculated for C<sub>23</sub>H<sub>18</sub>N<sub>2</sub>: 323.1543, found: 323.1540.

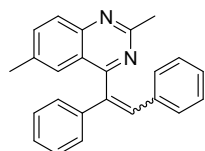

#### 4-(1,2-Diphenylvinyl)-2,6-dimethylquinazoline (3ba)

Yellow solid (27.6 mg, 82%), mp: 112-115 °C, Z/E = 5:1.  $R_f$  = 0.5 (PE/EA 5:1).  $^1\text{H NMR}$  (400 MHz, Chloroform-*d*)  $\delta$  7.87 (d,  $J$  = 8.4 Hz, 1H), 7.65-7.57 (m, 2H), 7.42 (s, 1H), 7.36-7.27 (m, 6H), 7.24-7.19 (m, 1H), 7.07-6.98 (m, 3H), 6.87 (dd,  $J$  = 7.4, 2.2 Hz, 2H), 2.91 (s, 3H, Z/E-CH<sub>3</sub>C<sub>4</sub>N<sub>2</sub>), 2.34 (s, 3H, Z/E-CH<sub>3</sub>C<sub>6</sub>H<sub>5</sub>).  $^{13}\text{C NMR}$  (100 MHz, Chloroform-*d*)  $\delta$  168.8, 163.7, 149.5, 140.4, 137.2, 137.1, 136.4, 135.9, 131.4, 128.9, 128.6, 128.2, 128.0, 127.6, 127.6, 126.6, 125.0, 121.9, 26.7, 21.7. **HRMS (ESI):**  $[\text{M}+\text{H}]^+$  calculated for C<sub>24</sub>H<sub>20</sub>N<sub>2</sub>: 337.1699, found: 337.1695.

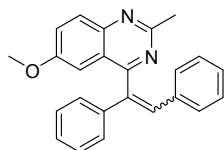

#### 4-(1,2-Diphenylvinyl)-6-methoxy-2-methylquinazoline (3ca)

Yellow solid (29.8 mg, 85%), mp: 121-123 °C, Z/E = 3.8:1.  $R_f$  = 0.6 (PE/EA 5:1).  $^1\text{H NMR}$  (400 MHz, Chloroform-*d*)  $\delta$  7.87 (d,  $J$  = 9.2 Hz, 1H), 7.44-7.38 (m, 2H), 7.35-7.27 (m, 6H), 7.23-7.17 (m, 2H), 7.09-6.98 (m, 4H), 6.92-6.87 (m, 2H), 3.63 (s, 3H, Z/E-OCH<sub>3</sub>), 2.89 (s, 3H, Z/E-CH<sub>3</sub>C<sub>4</sub>N<sub>2</sub>).  $^{13}\text{C NMR}$  (100 MHz, Chloroform-*d*)  $\delta$  162.4, 157.9, 140.6, 137.3, 136.0, 131.6, 130.0, 129.8, 129.4, 128.8, 128.7, 128.2, 128.0, 127.8, 127.1, 126.8, 122.6, 103.3, 55.5, 26.3. **HRMS (ESI):**  $[\text{M}+\text{H}]^+$  calculated for C<sub>24</sub>H<sub>20</sub>N<sub>2</sub>O: 353.1648, found: 353.1650.

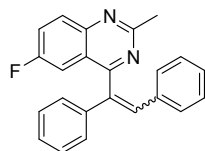

#### 4-(1,2-Diphenylvinyl)-6-fluoro-2-methylquinazoline (3da)

Yellow oil (18.4 mg, 54%), Z/E = 2.3:1.  $R_f$  = 0.4 (PE/EA 5:1).  $^1\text{H NMR}$  (400 MHz, Chloroform-*d*)  $\delta$  7.98 (dd,  $J$  = 9.2, 5.2 Hz, 1H), 7.58-7.51 (m, 2H), 7.44 (s, 1H), 7.38-7.27 (m, 8H), 7.23 (s, 3H), 7.07-7.03 (m, 3H), 6.90-6.85 (m, 2H), 2.93 (s, 3H, Z/E-CH<sub>3</sub>C<sub>4</sub>N<sub>2</sub>).  $^{13}\text{C NMR}$  (100 MHz, Chloroform-*d*)  $\delta$  169.7 (d,  $J$  = 6.0 Hz), 169.2 (d,  $J$  = 6.0 Hz), 164.1 (d,  $J$  = 2.5 Hz), 163.4 (d,  $J$  = 2.5 Hz), 160.2 (d,  $J$  = 249.1 Hz), 159.7 (d,  $J$  = 249.1 Hz), 148.6, 148.2, 140.1, 138.3, 138.2, 136.8, 135.8, 135.7, 135.1, 131.9, 130.9, 130.8, 130.7, 130.6, 129.8, 129.6, 128.8, 128.7, 128.3, 128.2, 128.1, 128.1, 127.8, 126.6, 124.4 (d,  $J$  = 26.0 Hz), 123.8 (d,  $J$  = 26.0 Hz), 122.4 (d,  $J$  = 9.1 Hz), 121.9 (d,  $J$  = 9.1 Hz), 110.1 (d,  $J$  = 23.0 Hz), 109.6 (d,  $J$  = 23.0 Hz), 26.5, 26.4.  $^{19}\text{F NMR}$  (376 MHz, Chloroform-*d*)  $\delta$  -110.73, -111.05. **HRMS (ESI):**  $[\text{M}+\text{H}]^+$  calculated for C<sub>23</sub>H<sub>17</sub>FN<sub>2</sub>: 341.1449, found: 341.1499.

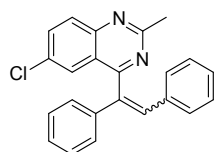

### 6-Chloro-4-(1,2-diphenylvinyl)-2-methylquinazoline (3ea)

Yellow solid (25.2 mg, 71%), mp: 110-113 °C, Z/E = 4:1.  $R_f = 0.4$  (PE/EA 5:1).  $^1\text{H}$  NMR (400 MHz, Chloroform-*d*)  $\delta$  7.91 (d,  $J = 9.2$  Hz, 1H), 7.80 (d,  $J = 2.4$  Hz, 1H), 7.69 (dd,  $J = 9.2, 2.4$  Hz, 1H), 7.45 (s, 1H), 7.35-7.31 (m, 7H), 7.23 (s, 2H), 7.08-7.02 (m, 3H), 6.89-6.85 (m, 2H), 2.93 (s, 3H, Z/E-CH<sub>3</sub>C<sub>4</sub>N<sub>2</sub>).  $^{13}\text{C}$  NMR (100 MHz, Chloroform-*d*)  $\delta$  169.2, 165.0, 149.5, 140.2, 136.8, 135.8, 135.2, 132.9, 132.2, 129.9, 129.0, 128.9, 128.4, 128.4, 128.0, 126.8, 125.3, 122.6, 26.7. HRMS (ESI): [M+H]<sup>+</sup> calculated for C<sub>23</sub>H<sub>17</sub>ClN<sub>2</sub>: 357.1153, found: 357.1157.

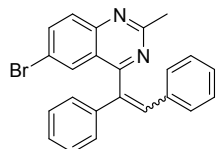

### 6-Bromo-4-(1,2-diphenylvinyl)-2-methylquinazoline (3fa)

Yellow solid (27.2 mg, 68%), mp: 111-113 °C, Z/E = 5.5:1.  $R_f = 0.5$  (PE/EA 5:1).  $^1\text{H}$  NMR (400 MHz, Chloroform-*d*)  $\delta$  7.97 (s, 1H), 7.85-7.78 (m, 2H), 7.46 (s, 1H), 7.37-7.28 (m, 6H), 7.23 (s, 1H), 7.01-7.00 (m, 3H), 6.92-6.83 (m, 2H), 2.92 (s, 3H, Z/E-CH<sub>3</sub>C<sub>4</sub>N<sub>2</sub>).  $^{13}\text{C}$  NMR (100 MHz, Chloroform-*d*)  $\delta$  168.9, 165.0, 149.7, 140.0, 137.6, 136.6, 135.7, 132.1, 129.9, 128.8, 128.7, 128.5, 128.3, 128.2, 127.9, 126.6, 122.9, 120.7, 26.7. HRMS (ESI): [M+H]<sup>+</sup> calculated for C<sub>23</sub>H<sub>17</sub>BrN<sub>2</sub>: 401.0648, found: 401.0646.

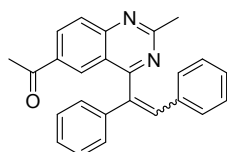

### 1-(4-(1,2-Diphenylvinyl)-2-methylquinazolin-6-yl)ethan-1-one (3ga)

Yellow solid (26.5 mg, 73%), mp: 127-129 °C, Z/E = 10:1.  $R_f = 0.6$  (PE/EA 5:1).  $^1\text{H}$  NMR (400 MHz, Chloroform-*d*)  $\delta$  8.40 (d,  $J = 2.0$  Hz, 1H), 8.30 (dd,  $J = 8.8, 2.0$  Hz, 1H), 7.99 (d,  $J = 8.8$  Hz, 1H), 7.52 (s, 1H), 7.38-7.28 (m, 6H), 7.06-7.00 (m, 3H), 6.93-6.87 (m, 2H), 2.96 (s, 3H, Z/E-CH<sub>3</sub>C<sub>4</sub>N<sub>2</sub>), 2.46 (s, 3H, Z/E-CH<sub>3</sub>CO).  $^{13}\text{C}$  NMR (150 MHz, Chloroform-*d*)  $\delta$  192.4, 167.3, 162.8, 136.5, 132.7, 131.6, 131.0, 128.5, 128.0, 124.8, 124.7, 124.6, 124.5, 124.3, 124.3, 123.9, 122.8, 116.9, 22.8, 22.4. HRMS (ESI): [M+H]<sup>+</sup> calculated for C<sub>25</sub>H<sub>20</sub>N<sub>2</sub>O: 365.1648, found: 365.1650.

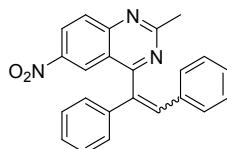

### 4-(1,2-Diphenylvinyl)-2-methyl-6-nitroquinazoline (3ha)

Yellow solid (17.2 mg, 47%), mp: 163-166 °C, Z/E = 3.6:1.  $R_f = 0.4$  (PE/EA 5:1).  $^1\text{H}$  NMR (400 MHz, Chloroform-*d*)  $\delta$  8.74 (d,  $J = 2.0$  Hz, 1H), 8.49 (dd,  $J = 8.8, 2.0$  Hz, 1H), 8.05 (d,  $J = 8.8$  Hz, 1H), 7.56 (s, 1H), 7.38-7.30 (m, 7H), 7.24 (s, 1H), 7.05-7.01 (m, 3H), 7.05-6.99 (m, 2H), 2.99 (s, 3H, Z/E-CH<sub>3</sub>C<sub>4</sub>N<sub>2</sub>).  $^{13}\text{C}$  NMR (100 MHz, Chloroform-*d*)  $\delta$  172.2, 168.1, 153.3, 145.5, 140.0, 136.4, 135.5, 133.1, 130.1, 128.9, 128.8, 128.5, 128.4, 128.1, 127.3, 126.8, 123.5, 120.7, 27.0. HRMS (ESI): [M+H]<sup>+</sup> calculated for C<sub>23</sub>H<sub>17</sub>N<sub>3</sub>O<sub>2</sub>: 368.1394, found: 368.1395.

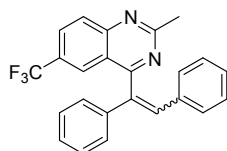

#### 4-(1,2-Diphenylvinyl)-2-methyl-6-(trifluoromethyl)quinazoline (3ia)

Yellow solid (17.1 mg, 44%), mp: 87-90 °C, Z/E = 2.3:1.  $R_f = 0.5$  (PE/EA 5:1).  $^1\text{H NMR}$  (400 MHz, Chloroform-*d*)  $\delta$  8.14-8.01 (m, 2H), 7.95-7.88 (m, 1H), 7.52 (s, 1H), 7.36-7.30 (m, 5H), 7.24 (s, 2H), 7.05-6.99 (m, 2H), 6.88-6.85 (m, 1H), 2.97 (s, 3H, Z/E-CH<sub>3</sub>C<sub>4</sub>N<sub>2</sub>).  $^{13}\text{C NMR}$  (150 MHz, Chloroform-*d*)  $\delta$  170.9, 170.9, 166.6, 165.9, 152.6, 152.1, 141.0, 140.1, 138.3, 138.1, 136.5, 136.0, 135.6, 135.5, 132.7, 130.8, 130.2, 129.9, 129.7, 129.6, 129.5, 129.5, 129.4, 129.3, 129.0, 129.0, 128.9, 128.7, 128.7, 128.7 (q,  $J = 33.0$  Hz), 128.3, 128.3, 128.2, 128.1, 127.8, 126.7, 124.8 (q,  $J = 4.4$  Hz), 124.5 (q,  $J = 4.4$  Hz), 123.3 (q,  $J = 271.9$  Hz), 120.8, 120.4, 26.8, 26.7.  $^{19}\text{F NMR}$  (376 MHz, Chloroform-*d*)  $\delta$  -62.77. **HRMS (ESI):** [M+H]<sup>+</sup> calculated for C<sub>24</sub>H<sub>17</sub>F<sub>3</sub>N<sub>2</sub>: 391.1417, found: 391.1418.

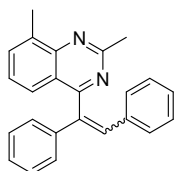

#### 4-(1,2-Diphenylvinyl)-2,8-dimethylquinazoline (3ja)

Yellow oil (26.2 mg, 78%), Z/E = 6.8:1.  $R_f = 0.7$  (PE/EA 5:1).  $^1\text{H NMR}$  (400 MHz, Chloroform-*d*)  $\delta$  7.70 (d,  $J = 8.4$  Hz, 1H), 7.61 (d,  $J = 7.2$  Hz, 1H), 7.40 (s, 1H), 7.35-7.26 (m, 6H), 7.25-7.20 (m, 2H), 7.05-7.00 (m, 3H), 6.90-6.85 (m, 2H), 2.94 (s, 3H, Z/E-CH<sub>3</sub>C<sub>4</sub>N<sub>2</sub>), 2.78 (s, 3H, Z/E-CH<sub>3</sub>C<sub>6</sub>H<sub>3</sub>).  $^{13}\text{C NMR}$  (100 MHz, Chloroform-*d*)  $\delta$  169.5, 163.5, 150.1, 140.5, 137.4, 136.3, 135.8, 133.9, 131.3, 128.9, 128.6, 128.2, 127.9, 127.5, 126.6, 124.1, 121.7, 26.8, 17.3. **HRMS (ESI):** [M+H]<sup>+</sup> calculated for C<sub>24</sub>H<sub>20</sub>N<sub>2</sub>: 337.1699, found: 337.1697.

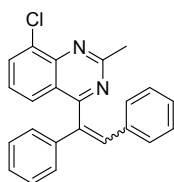

#### 8-Chloro-4-(1,2-diphenylvinyl)-2-methylquinazoline (3ka)

Yellow solid (27.0 mg, 76%), mp: 59-61 °C, Z/E = 1.6:1.  $R_f = 0.7$  (PE/EA 5:1).  $^1\text{H NMR}$  (400 MHz, Chloroform-*d*)  $\delta$  7.90-7.84 (m, 2H), 7.79 (dd,  $J = 8.4, 1.2$  Hz, 1H), 7.44 (s, 1H), 7.32-7.26 (m, 9H), 7.24-7.18 (m, 4H), 7.08-7.00 (m, 4H), 6.87-6.84 (m, 2H), 3.00 (s, 3H, Z/E-CH<sub>3</sub>C<sub>4</sub>N<sub>2</sub>).  $^{13}\text{C NMR}$  (100 MHz, Chloroform-*d*)  $\delta$  170.7, 170.2, 165.6, 164.8, 148.1, 147.7, 140.2, 138.3, 138.2, 136.8, 135.7, 135.5, 135.2, 133.8, 133.3, 132.5, 132.4, 131.9, 129.8, 129.5, 128.9, 128.8, 128.7, 128.3, 128.2, 128.1, 128.1, 128.0, 127.8, 126.9, 126.6, 126.1, 125.8, 125.4, 123.1, 122.7, 27.0, 27.0. **HRMS (ESI):** [M+H]<sup>+</sup> calculated for C<sub>23</sub>H<sub>17</sub>ClN<sub>2</sub>: 357.1153, found: 357.1153.

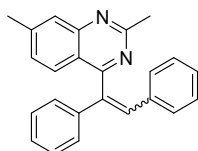

#### 4-(1,2-Diphenylvinyl)-2,7-dimethylquinazoline (3la)

Yellow solid (29.2 mg, 87%), mp: 96-98 °C, Z/E = 2.7:1.  $R_f$  = 0.5 (PE/EA 5:1).  $^1\text{H}$  NMR (400 MHz, Chloroform-*d*)  $\delta$  7.76-7.69 (m, 2H), 7.41 (s, 1H), 7.35-7.26 (m, 6H), 7.24-7.20 (m, 3H), 7.18 (d,  $J$  = 8.4 Hz, 1H), 7.07-6.99 (m, 3H), 6.91-6.85 (m, 2H), 2.91 (s, 3H, Z/E-CH<sub>3</sub>C<sub>4</sub>N<sub>2</sub>), 2.52 (s, 1H, Z/E-CH<sub>3</sub>C<sub>6</sub>H<sub>3</sub>).  $^{13}\text{C}$  NMR (100 MHz, Chloroform-*d*)  $\delta$  169.1, 164.6, 151.2, 145.2, 140.5, 138.7, 138.6, 137.2, 136.0, 135.8, 131.4, 129.8, 129.6, 129.5, 128.9, 128.7, 128.6, 128.2, 128.1, 128.0, 127.9, 127.6, 126.9, 126.6, 126.5, 126.1, 120.1, 119.6, 26.7, 22.2, 22.1. HRMS (ESI): [M+H]<sup>+</sup> calculated for C<sub>24</sub>H<sub>20</sub>N<sub>2</sub>: 337.1699, found: 337.1670.

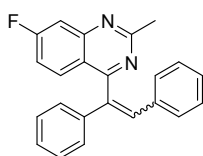

#### 4-(1,2-Diphenylvinyl)-7-fluoro-2-methylquinazoline (3ma)

White solid (27.2 mg, 80%), mp: 162-165 °C, Z/E = 3.8:1.  $R_f$  = 0.5 (PE/EA 5:1).  $^1\text{H}$  NMR (400 MHz, Chloroform-*d*)  $\delta$  7.84-7.72 (m, 3H), 7.39-7.36 (m, 6H), 7.24-7.18 (m, 2H), 7.07-7.03 (m, 4H), 6.88-6.84 (m, 2H), 2.91 (s, 3H, Z/E-CH<sub>3</sub>C<sub>4</sub>N<sub>2</sub>).  $^{13}\text{C}$  NMR (100 MHz, Chloroform-*d*)  $\delta$  166.0 (d,  $J$  = 3.9 Hz), 165.1 (d,  $J$  = 1.7 Hz), 157.8 (d,  $J$  = 262.8 Hz), 152.3, 140.1 (d,  $J$  = 1.1 Hz), 139.9 (d,  $J$  = 2.2 Hz), 136.2, 136.0, 134.0 (d,  $J$  = 9.7 Hz), 133.8 (d,  $J$  = 10.1 Hz), 131.8 (d,  $J$  = 3.6 Hz), 130.1 (d,  $J$  = 3.6 Hz), 129.8, 129.6, 128.8, 128.5, 128.2, 128.1, 128.0, 127.8, 127.7, 127.6, 127.3, 126.6, 124.3 (d,  $J$  = 4.5 Hz), 113.8 (d,  $J$  = 12.3 Hz), 112.1 (d,  $J$  = 21.2 Hz), 26.5.  $^{19}\text{F}$  NMR (376 MHz, Chloroform-*d*)  $\delta$  -104.58, -108.21. HRMS (ESI): [M+H]<sup>+</sup> calculated for C<sub>23</sub>H<sub>17</sub>FN<sub>2</sub>: 341.1449, found: 341.1498.

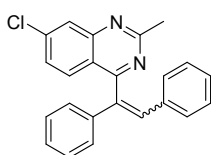

#### 7-Chloro-4-(1,2-diphenylvinyl)-2-methylquinazoline (3na)

Yellow oil (22.4 mg, 63%), Z/E = 2.4:1.  $R_f$  = 0.7 (PE/EA 5:1).  $^1\text{H}$  NMR (400 MHz, Chloroform-*d*)  $\delta$  7.96 (d,  $J$  = 2.0 Hz, 1H), 7.78 (d,  $J$  = 8.8 Hz, 1H), 7.43 (s, 1H), 7.35-7.27 (m, 8H), 7.24-7.15 (m, 2H), 7.08-7.01 (m, 3H), 6.89-6.84 (m, 2H), 2.92 (s, 3H, Z/E-CH<sub>3</sub>C<sub>4</sub>N<sub>2</sub>).  $^{13}\text{C}$  NMR (100 MHz, Chloroform-*d*)  $\delta$  170.3, 169.7, 165.7, 164.9, 151.5, 140.3, 140.2, 138.3, 138.2, 136.7, 135.7, 135.6, 131.9, 129.9, 129.6, 128.9, 128.7, 128.3, 128.3, 128.2, 128.1, 128.1, 127.9, 127.8, 127.7, 127.1, 126.6, 120.3, 119.8, 26.7, 26.6. HRMS (ESI): [M+H]<sup>+</sup> calculated for C<sub>23</sub>H<sub>17</sub>ClN<sub>2</sub>: 357.1153, found: 357.1155.

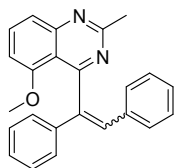

#### 4-(1,2-Diphenylvinyl)-5-methoxy-2-methylquinazoline (3oa)

Yellow oil (24.9 mg, 71%), Z/E = 2.6:1.  $R_f = 0.4$  (PE/EA 5:1).  **$^1\text{H NMR}$  (400 MHz, Chloroform-*d*)**  $\delta$  7.73 (t,  $J = 8.0$  Hz, 1H), 7.57 (d,  $J = 8.0$  Hz, 1H), 7.29-7.26 (m, 3H), 7.25-7.21 (m, 2H), 7.21-7.16 (m, 2H), 7.10 (s, 1H), 7.07-7.01 (m, 3H), 6.90-6.82 (m, 2H), 6.74 (d,  $J = 8.0$  Hz, 1H), 3.64 (s, 3H, Z/E-OCH<sub>3</sub>), 2.83 (s, 3H, Z/E-CH<sub>3</sub>C<sub>4</sub>N<sub>2</sub>).  **$^{13}\text{C NMR}$  (100 MHz, Chloroform-*d*)**  $\delta$  168.7, 166.8, 164.5, 163.7, 156.4, 156.3, 153.0, 152.7, 142.4, 142.4, 140.8, 138.0, 136.8, 136.6, 134.4, 134.1, 129.7, 129.5, 129.4, 128.9, 128.2, 128.1, 128.0, 127.8, 127.3, 127.1, 126.9, 126.4, 120.0, 119.9, 115.5, 114.0, 106.1, 106.0, 55.6, 55.5, 26.5, 26.4. **HRMS (ESI):**  $[\text{M}+\text{H}]^+$  calculated for C<sub>24</sub>H<sub>20</sub>N<sub>2</sub>O: 353.1648, found: 353.1649.

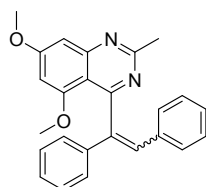

#### 4-(1,2-Diphenylvinyl)-5,7-dimethoxy-2-methylquinazoline (3pa)

Yellow solid (31.7 mg, 83%), mp: 69-71 °C, Z/E = 1.2:1.  $R_f = 0.3$  (PE/EA 5:1).  **$^1\text{H NMR}$  (400 MHz, Chloroform-*d*)**  $\delta$  7.29-7.26 (m, 3H), 7.25-7.21 (m, 5H), 7.20-7.14 (m, 6H), 7.08-7.02 (m, 3H), 6.94-6.84 (m, 3H), 6.66 (s, 1H), 6.38 (d,  $J = 1.6$  Hz, 1H), 6.33 (d,  $J = 1.6$  Hz, 1H), 3.93 (s, 3H, Z/E-OCH<sub>3</sub>), 3.93 (s, 3H, Z/E-OCH<sub>3</sub>), 2.87 (s, 3H, Z/E-CH<sub>3</sub>C<sub>4</sub>N<sub>2</sub>).  **$^{13}\text{C NMR}$  (101 MHz, Chloroform-*d*)**  $\delta$  167.6, 165.7, 165.1, 164.8, 164.7, 164.3, 157.6, 157.5, 155.0, 154.7, 142.3, 141.0, 138.1, 136.9, 136.7, 129.7, 129.5, 129.4, 128.8, 128.2, 128.0, 127.9, 127.8, 127.8, 127.2, 127.1, 126.9, 126.4, 111.7, 110.2, 99.2, 99.1, 98.8, 98.6, 55.8, 55.6, 55.5, 26.4, 26.3. **HRMS (ESI):**  $[\text{M}+\text{H}]^+$  calculated for C<sub>25</sub>H<sub>22</sub>N<sub>2</sub>O<sub>2</sub>: 383.1754, found: 383.1754.

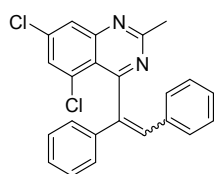

#### 5,7-Dichloro-4-(1,2-diphenylvinyl)-2-methylquinazoline (3qa)

Yellow solid (31.2 mg, 80%), mp: 51-53 °C, Z/E = 1.9:1.  $R_f = 0.6$  (PE/EA 5:1).  **$^1\text{H NMR}$  (400 MHz, Chloroform-*d*)**  $\delta$  7.93 (d,  $J = 2.0$  Hz, 1H), 7.46 (d,  $J = 2.0$  Hz, 1H), 7.37-7.33 (m, 1H), 7.32-7.26 (m, 5H), 7.24-7.19 (m, 5H), 7.09-7.03 (m, 3H), 6.87-6.81 (m, 2H), 6.56 (s, 1H), 2.87 (s, 3H, Z/E-CH<sub>3</sub>C<sub>4</sub>N<sub>2</sub>).  **$^{13}\text{C NMR}$  (100 MHz, Chloroform-*d*)**  $\delta$  169.6, 167.7, 165.5, 164.6, 153.6, 153.2, 140.0, 139.8, 139.2, 139.1, 138.9, 137.4, 136.3, 136.1, 133.4, 132.5, 132.2, 130.5, 130.2, 130.0, 129.9, 129.4, 128.8, 128.5, 128.2, 128.2, 127.9, 127.8, 127.7, 127.4, 127.0, 126.9, 126.7, 119.9, 118.6, 26.3, 26.2. **HRMS (ESI):**  $[\text{M}+\text{H}]^+$  calculated for C<sub>23</sub>H<sub>16</sub>Cl<sub>2</sub>N<sub>2</sub>: 391.0763,

found: 391.0761.

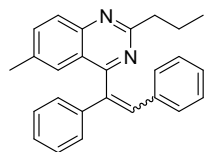

#### 4-(1,2-Diphenylvinyl)-6-methyl-2-propylquinazoline (3ra)

Pale yellow solid (21.1 mg, 58%), mp: 80-82 °C, Z/E = 2.2:1.  $R_f$  = 0.6 (PE/EA 5:1). **<sup>1</sup>H NMR (400 MHz, Chloroform-*d*)**  $\delta$  7.89 (d,  $J$  = 8.4 Hz, 1H), 7.76 (s, 1H), 7.66-7.55 (m, 2H), 7.37-7.27 (m, 6H), 7.24-7.20 (m, 6H), 7.08-6.95 (m, 3H), 6.90-6.85 (m, 1H), 3.10 (t,  $J$  = 7.6 Hz, 2H, Z/E-CH<sub>2</sub>CH<sub>2</sub>CH<sub>3</sub>), 2.40 (s, 3H, Z/E-CH<sub>3</sub>C<sub>6</sub>H<sub>3</sub>), 1.94 (m, 2H, Z/E-CH<sub>2</sub>CH<sub>3</sub>), 1.03 (t,  $J$  = 7.2 Hz, 3H, Z/E-CH<sub>3</sub>CH<sub>2</sub>). **<sup>13</sup>C NMR (100 MHz, Chloroform-*d*)**  $\delta$  169.5, 168.6, 166.9, 166.2, 149.5, 140.2, 138.7, 138.5, 137.5, 137.1, 136.5, 136.2, 136.0, 135.9, 135.7, 134.3, 131.3, 129.8, 129.6, 128.9, 128.6, 128.1, 127.9, 127.8, 127.5, 126.5, 125.4, 124.9, 122.1, 121.5, 41.8, 41.8, 22.6, 22.4, 21.8, 21.7, 14.0, 13.8. **HRMS (ESI):** [M+H]<sup>+</sup> calculated for C<sub>26</sub>H<sub>24</sub>N<sub>2</sub>: 365.2012, found: 365.2014.

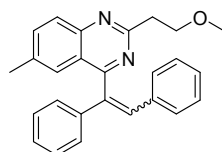

#### 4-(1,2-Diphenylvinyl)-2-(2-methoxyethyl)-6-methylquinazoline (3sa)

Yellow oil (22.8 mg, 60%), Z/E = 1.6:1.  $R_f$  = 0.4 (PE/EA 5:1). **<sup>1</sup>H NMR (400 MHz, Chloroform-*d*)**  $\delta$  7.91 (d,  $J$  = 8.4 Hz, 2H), 7.62-7.59 (m, 1H), 7.58 (s, 1H), 7.43 (s, 1H), 7.38-7.30 (m, 5H), 7.30-7.27 (m, 3H), 7.23 (m, 3H), 7.08-6.97 (m, 4H), 6.91-6.84 (m, 2H), 3.91 (t,  $J$  = 6.8 Hz, 2H, Z/E-CH<sub>2</sub>OCH<sub>3</sub>), 3.41 (t,  $J$  = 6.8 Hz, 2H, Z/E-CH<sub>2</sub>CH<sub>2</sub>OCH<sub>3</sub>), 3.30 (s, 3H, Z/E-CH<sub>3</sub>OCH<sub>2</sub>), 2.34 (s, 3H, Z/E-CH<sub>3</sub>C<sub>6</sub>H<sub>3</sub>). **<sup>13</sup>C NMR (100 MHz, Chloroform-*d*)**  $\delta$  169.5, 168.7, 164.2, 163.3, 149.6, 140.3, 138.6, 137.3, 137.3, 136.7, 136.2, 136.0, 136.0, 135.7, 134.5, 131.3, 129.8, 129.6, 128.9, 128.6, 128.6, 128.2, 128.1, 128.1, 127.9, 127.8, 127.8, 127.5, 126.5, 125.4, 124.9, 122.2, 121.7, 71.3, 71.1, 58.7, 40.1, 39.8, 21.8, 21.7. **HRMS (ESI):** [M+H]<sup>+</sup> calculated for C<sub>26</sub>H<sub>24</sub>N<sub>2</sub>O: 381.1961, found: 381.1961.

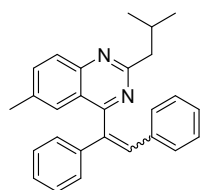

#### 4-(1,2-Diphenylvinyl)-2-isobutyl-6-methylquinazoline (3ta)

Yellow oil (31.0 mg, 82%), Z/E = 1.9:1.  $R_f$  = 0.7 (PE/EA 5:1). **<sup>1</sup>H NMR (400 MHz, Chloroform-*d*)**  $\delta$  7.90 (d,  $J$  = 8.4 Hz, 1H), 7.60 (m, 2H), 7.44 (s, 1H), 7.38-7.26 (m, 7H), 7.24-7.19 (m, 3H), 7.07-6.96 (m, 4H), 6.92-6.85 (m, 2H), 3.01 (d,  $J$  = 7.2 Hz, 2H, Z/E-CH<sub>2</sub>CH(CH<sub>3</sub>)<sub>2</sub>), 2.34 (s, 3H, Z/E-CH<sub>3</sub>C<sub>6</sub>H<sub>3</sub>), 2.29 (m, 1H, Z/E-CH(CH<sub>3</sub>)<sub>2</sub>), 0.92 (d,  $J$  = 6.8 Hz, 6H, Z/E-(CH<sub>3</sub>)<sub>2</sub>CH). **<sup>13</sup>C NMR (100 MHz, Chloroform-*d*)**  $\delta$  169.5, 168.6, 166.4, 165.6, 149.8, 149.4, 140.2, 138.8, 138.6, 137.6, 137.1, 136.5, 136.2, 136.0, 136.0, 135.7, 134.2, 131.3, 129.8, 129.6, 128.9, 128.6, 128.6, 128.1, 128.1,

128.0, 127.9, 127.8, 127.5, 126.5, 125.4, 124.9, 122.1, 121.5, 48.8, 48.6, 29.0, 28.7, 22.5, 22.4, 21.8, 21.7. **HRMS (ESI):**  $[M+H]^+$  calculated for  $C_{27}H_{26}N_2$ : 379.2169, found: 379.2172.

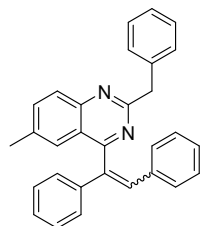

#### 2-Benzyl-4-(1,2-diphenylvinyl)-6-methylquinazoline (3ua)

Yellow solid (30.9 mg, 75%), mp: 116-118 °C, Z/E = 6:1.  $R_f = 0.6$  (PE/EA 5:1).  **$^1H$  NMR (400 MHz, Chloroform-*d*)**  $\delta$  7.88 (d,  $J = 8.4$  Hz, 1H), 7.61-7.52 (m, 2H), 7.42 (s, 1H), 7.38-7.26 (m, 8H), 7.23-7.10 (m, 5H), 7.04-6.99 (m, 1H), 6.94 (t,  $J = 7.6$  Hz, 2H), 6.84 (d,  $J = 7.6$  Hz, 2H), 4.48 (s, 2H, Z/E- $CH_2C_6H_5$ ), 2.32 (s, 3H, Z/E- $CH_3C_6H_3$ ).  **$^{13}C$  NMR (150 MHz, Chloroform-*d*)**  $\delta$  164.9, 161.1, 145.7, 136.1, 134.8, 133.3, 133.3, 132.2, 131.9, 127.2, 125.0, 124.8, 124.6, 124.3, 124.1, 123.9, 123.5, 122.5, 122.1, 120.8, 118.0, 42.1, 17.6. **HRMS (ESI):**  $[M+H]^+$  calculated for  $C_{30}H_{24}N_2$ : 413.2012, found: 413.2010.

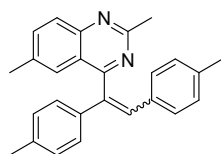

#### 4-(1,2-Di-*p*-tolylvinyl)-2,6-dimethylquinazoline (3bb)

Yellow solid (30.9 mg, 85%), mp: 126-128 °C, Z/E = 6:1.  $R_f = 0.4$  (PE/EA 5:1).  **$^1H$  NMR (400 MHz, Chloroform-*d*)**  $\delta$  7.90-7.83 (m, 1H), 7.64-7.55 (m, 2H), 7.35 (s, 1H), 7.21 (d,  $J = 8.0$  Hz, 2H), 7.10 (d,  $J = 8.0$  Hz, 2H), 6.83 (d,  $J = 8.0$  Hz, 2H), 6.73 (d,  $J = 8.0$  Hz, 2H), 2.91 (s, 3H, Z/E- $CH_3C_4N_2$ ), 2.33 (s, 3H, Z/E- $CH_3C_6H_4$ ), 2.32 (s, 3H, Z/E- $CH_3C_6H_4$ ), 2.17 (s, 3H, Z/E- $CH_3C_6H_3$ ).  **$^{13}C$  NMR (100 MHz, Chloroform-*d*)**  $\delta$  169.3, 163.7, 149.5, 137.7, 137.4, 137.1, 136.4, 136.0, 130.4, 129.3, 128.9, 128.8, 127.6, 126.4, 125.1, 122.0, 26.6, 21.7, 21.2, 21.1. **HRMS (ESI):**  $[M+H]^+$  calculated for  $C_{26}H_{24}N_2$ : 365.2012, found: 365.2010.

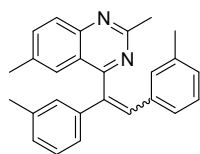

#### 4-(1,2-Di-*m*-tolylvinyl)-2,6-dimethylquinazoline (3bc)

Yellow oil (29.1 mg, 80%), Z/E = 2:1.  $R_f = 0.4$  (PE/EA 5:1).  **$^1H$  NMR (400 MHz, Chloroform-*d*)**  $\delta$  7.91-7.78 (m, 2H), 7.68-7.56 (m, 2H), 7.37 (s, 1H), 7.23-7.13 (m, 3H), 7.13-6.98 (m, 4H), 6.92-6.81 (m, 2H), 6.78 (s, 1H), 6.59-6.51 (m, 1H), 2.92 (s, 3H, Z/E- $CH_3C_4N_2$ ), 2.34 (s, 3H, Z/E- $CH_3C_6H_4$ ), 2.31 (s, 3H, Z/E- $CH_3C_6H_4$ ), 2.10 (s, 3H, Z/E- $CH_3C_6H_3$ ).  **$^{13}C$  NMR (100 MHz, Chloroform-*d*)**  $\delta$  168.9, 168.0, 162.6, 162.1, 148.9, 148.5, 139.4, 137.4, 137.3, 137.2, 137.2, 136.6, 136.1, 136.0, 135.5, 135.3, 134.9, 134.8, 134.8, 133.2, 130.3, 129.6, 129.1, 129.0, 127.7, 127.6, 127.5, 127.5, 127.4, 127.3, 127.0, 126.9, 126.6, 126.5, 126.1, 125.7, 125.6, 124.6, 124.0.



122.8, 120.9, 120.4, 25.5, 20.8, 20.7, 20.5, 20.3, 20.3, 20.2. **HRMS (ESI):**  $[M+H]^+$  calculated for  $C_{26}H_{24}N_2$ : 365.2012, found: 365.2011.

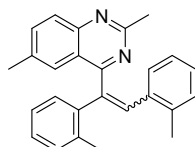

#### 4-(1,2-Di-*o*-tolylvinyl)-2,6-dimethylquinazoline (3bd)

Yellow oil (16.3 mg, 45%),  $Z/E = 1:1$ .  $R_f = 0.4$  (PE/EA 5:1).  **$^1H$  NMR (400 MHz, Chloroform-*d*)**  $\delta$  7.87 (d,  $J = 8.4$  Hz, 1H), 7.77 (s, 1H), 7.72 (d,  $J = 8.4$  Hz, 1H), 7.63 (dd,  $J = 8.4, 2.0$  Hz, 1H), 7.57 (s, 1H), 7.47 (dd,  $J = 8.4, 2.0$  Hz, 1H), 7.38 (d,  $J = 7.2$  Hz, 1H), 7.33 (s, 1H), 7.25-7.21 (m, 4H), 7.19-7.16 (m, 3H), 7.14-7.11 (m, 2H), 7.10-7.05 (m, 2H), 6.93-6.85 (m, 3H), 6.63-6.56 (m, 2H), 2.80 (s, 3H,  $Z/E$ - $CH_3C_4H_9$ ), 2.45 (s, 3H,  $Z/E$ - $CH_3C_6H_3$ ), 2.35 (s, 3H,  $Z/E$ - $CH_3C_6H_4$ ), 2.27 (s, 3H,  $Z/E$ - $CH_3C_6H_4$ ).  **$^{13}C$  NMR (100 MHz, Chloroform-*d*)**  $\delta$  169.3, 168.9, 163.4, 163.1, 150.3, 149.5, 141.9, 139.1, 138.8, 138.7, 137.1, 136.6, 136.4, 136.3, 136.3, 136.0, 135.9, 135.8, 135.7, 135.7, 134.9, 131.0, 130.9, 130.81, 130.2, 130.1, 129.8, 129.3, 129.0, 128.0, 127.9, 127.9, 127.8, 127.6, 126.0, 125.9, 125.5, 125.3, 125.2, 121.4, 121.2, 26.6, 26.5, 21.9, 21.6, 21.3, 20.3, 20.3, 20.3. **HRMS (ESI):**  $[M+H]^+$  calculated for  $C_{26}H_{24}N_2$ : 365.2012, found: 365.2010.

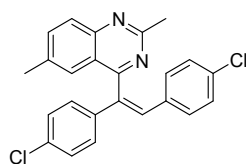

#### (*Z*)-4-(1,2-Bis(4-chlorophenyl)vinyl)-2,6-dimethylquinazoline (3be)

Yellow solid (14.9 mg, 37%), mp: 140-142 °C.  $R_f = 0.5$  (PE/EA 5:1).  **$^1H$  NMR (400 MHz, Chloroform-*d*)**  $\delta$  7.89 (d,  $J = 8.8$  Hz, 1H), 7.64 (dd,  $J = 8.8, 1.6$  Hz, 1H), 7.51 (s, 1H), 7.33 (s, 1H), 7.30-7.26 (m, 2H), 7.25-7.22 (m, 2H), 7.00 (d,  $J = 8.4$  Hz, 2H), 6.78 (d,  $J = 8.4$  Hz, 2H), 2.91 (s, 3H), 2.36 (s, 3H).  **$^{13}C$  NMR (100 MHz, Chloroform-*d*)**  $\delta$  167.9, 163.7, 149.6, 138.5, 137.6, 136.7, 136.6, 134.1, 134.0, 133.6, 130.3, 130.0, 128.9, 128.5, 127.9, 127.8, 124.4, 121.6, 26.5, 21.7. **HRMS (ESI):**  $[M+H]^+$  calculated for  $C_{24}H_{18}Cl_2N_2$ : 405.0920, found: 405.0920.

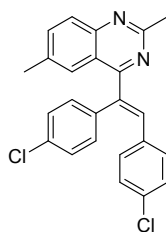

#### (*E*)-4-(1,2-Bis(4-chlorophenyl)vinyl)-2,6-dimethylquinazoline (3be')

Yellow solid (17.8 mg, 44%), mp: 131-134 °C.  $R_f = 0.4$  (PE/EA 5:1).  **$^1H$  NMR (400 MHz, Chloroform-*d*)**  $\delta$  7.88 (d,  $J = 8.4$  Hz, 1H), 7.68-7.62 (m, 2H), 7.26-7.21 (m, 6H), 7.17-7.13 (m, 2H), 6.95 (s, 1H), 2.90 (s, 3H), 2.42 (s, 3H).  **$^{13}C$  NMR (100 MHz, Chloroform-*d*)**  $\delta$  168.8, 162.9, 150.0, 138.0, 136.9, 136.6, 136.1, 134.1, 133.9, 133.6, 131.0, 130.8, 129.1, 128.5, 127.8, 125.0, 121.1, 26.4, 21.9. **HRMS (ESI):**  $[M+H]^+$  calculated for  $C_{24}H_{18}Cl_2N_2$ : 405.0920, found: 405.0922.

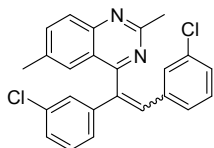

**4-(1,2-Bis(3-chlorophenyl)vinyl)-2,6-dimethylquinazoline (3bf)**

Yellow oil (28.7 mg, 71%),  $Z/E = 1.7:1$ .  $R_f = 0.5$  (PE/EA 5:1).  $^1\text{H NMR}$  (400 MHz, Chloroform-*d*)  $\delta$  7.89 (d,  $J = 8.4$  Hz, 1H), 7.64 (dd,  $J = 8.4, 2.0$  Hz, 1H), 7.51 (s, 1H), 7.36 (t,  $J = 1.6$  Hz, 1H), 7.34 (s, 1H), 7.28-7.27 (m, 2H), 7.22-7.22 (m, 1H), 7.18-7.17 (m, 1H), 7.00 (t,  $J = 1.6$  Hz, 1H), 6.93 (s, 1H), 6.63 (d,  $J = 8.0$  Hz, 1H), 2.92 (s, 3H,  $Z/E\text{-CH}_3\text{C}_4\text{N}_2$ ), 2.45 (s, 2H,  $Z/E\text{-CH}_3\text{C}_6\text{H}_3$ ).  $^{13}\text{C NMR}$  (100 MHz, Chloroform-*d*)  $\delta$  167.4, 163.6, 162.9, 149.6, 141.7, 139.6, 138.4, 137.6, 137.4, 137.3, 137.2, 137.1, 136.7, 136.2, 134.7, 134.6, 134.2, 134.1, 133.7, 130.8, 130.0, 129.9, 129.7, 129.5, 129.4, 129.3, 129.3, 128.4, 128.4, 128.2, 127.9, 127.8, 127.8, 127.7, 126.6, 126.5, 124.9, 124.4, 121.5, 121.1, 26.5, 26.4, 21.9, 21.7. **HRMS (ESI):**  $[\text{M}+\text{H}]^+$  calculated for  $\text{C}_{24}\text{H}_{18}\text{Cl}_2\text{N}_2$ : 405.0920, found: 405.0921.

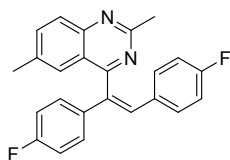

**(Z)-4-(1,2-Bis(4-fluorophenyl)vinyl)-2,6-dimethylquinazoline (3bg)**

Yellow solid (17.1 mg, 46%), mp: 119-120 °C.  $R_f = 0.4$  (PE/EA 5:1).  $^1\text{H NMR}$  (400 MHz, Chloroform-*d*)  $\delta$  7.88 (d,  $J = 8.8$  Hz, 1H), 7.64 (dd,  $J = 8.8, 1.6$  Hz, 1H), 7.54 (s, 1H), 7.32-7.27 (m, 3H), 7.01 (t,  $J = 8.8$  Hz, 2H), 6.86-6.81 (m, 2H), 6.72 (t,  $J = 8.8$  Hz, 2H), 2.91 (s, 3H), 2.36 (s, 3H).  $^{13}\text{C NMR}$  (100 MHz, Chloroform-*d*)  $\delta$  168.3, 163.8, 162.6 (d,  $J = 248.4$  Hz), 161.9 (d,  $J = 248.7$  Hz), 149.6, 137.5, 136.6, 136.4 (d,  $J = 3.3$  Hz), 136.0 (d,  $J = 1.4$  Hz), 131.9 (d,  $J = 3.5$  Hz), 130.5 (d,  $J = 8.1$  Hz), 130.0, 128.3 (d,  $J = 8.1$  Hz), 127.8, 124.6, 121.6, 115.6 (d,  $J = 21.7$  Hz), 115.3 (d,  $J = 21.6$  Hz), 26.5, 21.7.  $^{19}\text{F NMR}$  (376 MHz, Chloroform-*d*)  $\delta$  -113.06, -113.62. **HRMS (ESI):**  $[\text{M}+\text{H}]^+$  calculated for  $\text{C}_{24}\text{H}_{18}\text{F}_2\text{N}_2$ : 373.1511, found: 373.1512.

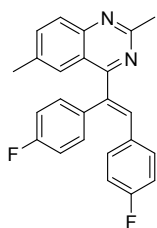

**(E)-4-(1,2-Bis(4-fluorophenyl)vinyl)-2,6-dimethylquinazoline (3bg')**

Yellow oil (14.1 mg, 38%),  $R_f = 0.3$  (PE/EA 5:1).  $^1\text{H NMR}$  (400 MHz, Chloroform-*d*)  $\delta$  7.88 (d,  $J = 8.4$  Hz, 1H), 7.69 (s, 1H), 7.65 (dd,  $J = 8.4, 2.0$  Hz, 1H), 7.32-7.28 (m, 2H), 7.22-7.16 (m, 2H), 7.01-6.92 (m, 5H), 2.90 (s, 3H), 2.42 (s, 3H).  $^{13}\text{C NMR}$  (100 MHz, Chloroform-*d*)  $\delta$  169.1, 162.6, 162.3 (d,  $J = 248.4$  Hz), 162.2 (d,  $J = 248.8$  Hz), 150.0 (d,  $J = 2.3$  Hz), 137.5, 137.4, 136.7, 135.9, 134.2 (d,  $J = 3.6$  Hz), 131.8 (d,  $J = 3.4$  Hz), 131.5 (d,  $J = 8.0$  Hz), 131.4 (d,  $J = 8.0$  Hz), 127.8, 125.2, 121.2, 115.9 (d,  $J = 21.5$  Hz), 115.3 (d,  $J = 21.5$  Hz). 26.5, 21.8.  $^{19}\text{F NMR}$  (376 MHz, Chloroform-*d*)  $\delta$  -112.73, -113.10. **HRMS (ESI):**  $[\text{M}+\text{H}]^+$  calculated for  $\text{C}_{24}\text{H}_{18}\text{F}_2\text{N}_2$ :

373.1511, found: 373.1511.

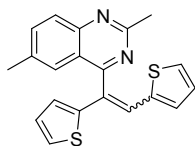

**4-(1,2-Di(thiophen-2-yl)vinyl)-2,6-dimethylquinazoline (3bh)**

Yellow oil (18.0 mg, 52%), Z/E = 15:1.  $R_f$  = 0.6 (PE/EA 5:1).  $^1\text{H NMR}$  (400 MHz, Chloroform-*d*)  $\delta$  8.32 (s, 1H), 7.66 (d,  $J$  = 5.2 Hz, 1H), 7.40-7.30 (m, 3H), 7.28-7.27 (m, 1H), 7.14 (d,  $J$  = 3.2 Hz, 1H), 7.10 (d,  $J$  = 8.0 Hz, 2H), 7.01-6.96 (m, 1H), 2.30 (s, 3H), 1.26 (s, 3H).  $^{13}\text{C NMR}$  (150 MHz, Chloroform-*d*)  $\delta$  164.2, 138.9, 135.5, 135.5, 135.0, 134.4, 134.2, 131.4, 130.5, 130.0, 129.9, 129.7, 129.0, 127.1, 123.8, 120.3, 30.0, 21.2. **HRMS (ESI):**  $[M+H]^+$  calculated for  $\text{C}_{20}\text{H}_{16}\text{N}_2\text{S}$ : 349.0828, found: 349.0823.

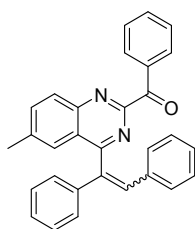

**4-(1,2-Diphenylvinyl)-6-methylquinazolin-2-yl(phenyl)methanone (4aa)**

Yellow solid (20.0 mg, 47%), mp: 85-87 °C, Z/E = 3.3:1.  $R_f$  = 0.4 (PE/EA 5:1).  $^1\text{H NMR}$  (400 MHz, Chloroform-*d*)  $\delta$  8.14 (d,  $J$  = 8.4 Hz, 1H), 7.84-7.79 (m, 1H), 7.79-7.71 (m, 2H), 7.53-7.48 (m, 2H), 7.47 (s, 1H), 7.44-7.38 (m, 1H), 7.37-7.27 (m, 8H), 7.23 (s, 2H), 7.15-7.06 (m, 3H), 6.93 (d,  $J$  = 6.8 Hz, 2H), 2.43 (s, 3H, Z/E- $\text{CH}_3\text{C}_6\text{H}_3$ ).  $^{13}\text{C NMR}$  (100 MHz, Chloroform-*d*)  $\delta$  191.9, 191.7, 169.7, 168.6, 158.5, 157.4, 149.7, 149.3, 140.1, 140.0, 139.4, 138.6, 138.0, 137.7, 137.6, 137.0, 136.5, 136.1, 135.7, 135.3, 134.6, 133.2, 133.2, 132.4, 131.2, 131.1, 131.0, 130.8, 130.5, 129.8, 129.7, 129.6, 129.5, 129.4, 129.2, 128.9, 128.8, 128.7, 128.4, 128.2, 128.2, 128.1, 128.1, 127.9, 127.7, 126.7, 125.5, 125.2, 124.1, 22.1, 22.0. **HRMS (ESI):**  $[M+H]^+$  calculated for  $\text{C}_{30}\text{H}_{22}\text{N}_2\text{O}$ : 427.1805, found: 427.1806.

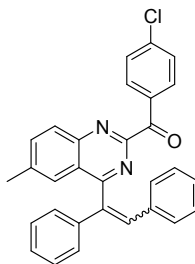

**(4-Chlorophenyl)(4-(1,2-diphenylvinyl)-6-methylquinazolin-2-yl)methanone(4ab)**

Yellow solid (25.7 mg, 56%), mp: 60-62 °C, Z/E = 2.4:1.  $R_f$  = 0.4 (PE/EA 5:1).  $^1\text{H NMR}$  (400 MHz, Chloroform-*d*)  $\delta$  8.15 (d,  $J$  = 8.8 Hz, 1H), 8.04 (d,  $J$  = 8.8 Hz, 1H), 7.77-7.71 (m, 4H), 7.48 (s, 1H), 7.35-7.31 (m, 7H), 7.25-7.21 (m, 4H), 7.14-7.08 (m, 3H), 6.91 (d,  $J$  = 7.2 Hz, 2H), 2.44 (s, 3H, Z/E- $\text{CH}_3\text{C}_6\text{H}_3$ ).  $^{13}\text{C NMR}$  (100 MHz, Chloroform-*d*)  $\delta$  190.5, 190.3, 169.8, 168.6, 157.9, 156.8, 149.8, 149.3, 140.3, 140.1, 139.7, 139.7, 139.6, 138.7, 137.9, 137.7, 137.2, 136.6, 136.1, 136.0, 135.6, 134.1,

133.8, 132.7, 132.5, 132.4, 130.5, 129.9, 129.7, 129.6, 129.6, 129.4, 129.2, 128.9, 128.8, 128.7, 128.4, 128.4, 128.4, 128.2, 128.2, 128.0, 127.8, 126.7, 125.5, 125.2, 124.3, 123.3, 22.1, 22.0. **HRMS (ESI):**  $[M+H]^+$  calculated for  $C_{30}H_{21}ClN_2O$ : 461.1415, found: 461.1415.

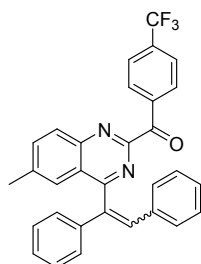

**(4-(1,2-Diphenylvinyl)-6-methylquinazolin-2-yl)(4-(trifluoromethyl)phenyl)methanone (4ac)**

Yellow solid (38.0 mg, 77%), mp: 55-57 °C, Z/E = 3:1.  $R_f$  = 0.5 (PE/EA 5:1).  **$^1H$  NMR (400 MHz, Chloroform-*d*)**  $\delta$  8.20-8.15 (m, 2H), 7.93-7.89 (m, 2H), 7.77 (dd,  $J$  = 8.8, 2.0 Hz, 1H), 7.74-7.71 (m, 1H), 7.68-7.62 (m, 2H), 7.52 (d,  $J$  = 8.8 Hz, 3H), 7.49-7.45 (m, 1H), 7.34-7.31 (m, 6H), 7.23 (s, 1H), 7.14-7.11 (m, 3H), 6.94-6.90 (m, 2H), 2.44 (s, 3H, Z/E- $CH_3C_6H_5$ ).  **$^{13}C$  NMR (100 MHz, Chloroform-*d*)**  $\delta$  190.7, 190.6, 171.3, 171.1, 169.9, 168.8, 158.8, 157.3, 156.2, 149.8, 149.3, 140.6, 140.1, 140.0, 138.7, 138.7, 138.4, 138.4, 137.9, 137.7, 137.3, 136.7, 136.2, 136.1, 135.6, 134.1 (q,  $J$  = 32.6 Hz), 132.7, 131.5, 131.3, 130.5, 129.9, 129.8, 129.7, 129.4, 129.2, 129.07, 128.9, 128.8, 128.7, 128.6, 128.4, 128.3, 128.3, 128.2, 128.2, 128.0, 127.8, 126.6, 126.1 (q,  $J$  = 3.9 Hz), 125.9, 125.5, 125.3, 125.0 (q,  $J$  = 3.9 Hz), 124.9, 124.4, 123.6 (q,  $J$  = 271.0 Hz), 116.3, 22.2, 22.0.  **$^{19}F$  NMR (376 MHz, Chloroform-*d*)**  $\delta$  -63.21. **HRMS (ESI):**  $[M+H]^+$  calculated for  $C_{31}H_{21}F_3N_2O$ : 495.1679, found: 495.1677.

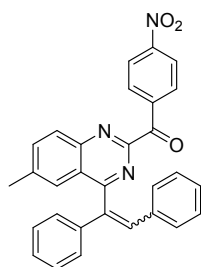

**(4-(1,2-Diphenylvinyl)-6-methylquinazolin-2-yl)(4-nitrophenyl)methanone (4ad)**

Yellow solid (40.0 mg, 85%), mp: 63-65 °C, Z/E = 1:1.  $R_f$  = 0.4 (PE/EA 5:1).  **$^1H$  NMR (400 MHz, Chloroform-*d*)**  $\delta$  8.24-8.20 (m, 3H), 8.17 (t,  $J$  = 8.0 Hz, 2H), 8.11-8.04 (m, 3H), 7.96-7.90 (m, 2H), 7.83 (dd,  $J$  = 8.8, 2.0 Hz, 1H), 7.80 (dd,  $J$  = 8.8, 2.0 Hz, 1H), 7.74 (s, 1H), 7.49 (s, 1H), 7.39-7.28 (m, 11H), 7.25-7.21 (m, 5H), 7.20-7.12 (m, 4H), 6.94-6.89 (m, 2H), 2.46 (s, 3H, Z/E- $CH_3C_6H_5$ ).  **$^{13}C$  NMR (100 MHz, Chloroform-*d*)**  $\delta$  190.1, 189.9, 170.0, 168.8, 156.8, 155.7, 150.0, 149.9, 149.3, 140.9, 140.8, 140.5, 140.4, 140.1, 138.8, 137.8, 137.7, 137.4, 136.9, 136.48, 136.14, 135.50, 132.84, 132.20, 132.00, 129.91, 129.84, 129.78, 128.93, 128.9, 128.8, 128.5, 128.3, 128.3, 128.2, 128.1, 127.9, 126.6, 125.5, 125.3, 124.5, 123.5, 123.4, 123.1, 123.0, 22.2, 22.1. **HRMS (ESI):**  $[M+H]^+$  calculated for  $C_{30}H_{21}N_3O_3$ : 472.1656, found:

472.1657.

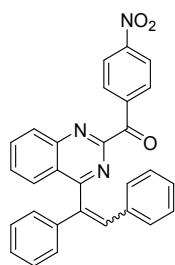

**(4-(1,2-Diphenylvinyl)quinazolin-2-yl)(4-nitrophenyl)methanone (4ae)**

Yellow solid (33.3 mg, 73%), mp: 60-64 °C, Z/E = 1.3:1.  $R_f = 0.4$  (PE/EA 5:1).  $^1\text{H NMR}$  (400 MHz, Chloroform-*d*)  $\delta$  8.30-8.27 (m, 2H), 8.11-8.07 (m, 2H), 8.12-8.08 (m, 2H), 8.03-7.96 (m, 3H), 7.95-7.91 (m, 2H), 7.70 (dd,  $J = 8.4, 6.8$ , Hz, 1H), 7.62 (dd,  $J = 8.4, 6.8$ , Hz, 1H), 7.50 (s, 1H), 7.38-7.31 (m, 7H), 7.30-7.27 (m, 3H), 7.24-7.22 (m, 3H), 7.19-7.12 (m, 4H), 6.91 (d,  $J = 7.2$  Hz, 2H).  $^{13}\text{C NMR}$  (100 MHz, Chloroform-*d*)  $\delta$  190.0, 189.9, 171.0, 169.9, 157.5, 156.4, 151.3, 150.7, 150.1, 150.0, 140.7, 140.3, 140.1, 138.7, 137.7, 137.6, 136.9, 136.0, 135.4, 135.0, 134.6, 133.1, 132.2, 131.9, 130.1, 130.1, 129.9, 129.8, 129.6, 128.9, 128.8, 128.5, 128.5, 128.4, 128.3, 128.2, 127.9, 126.9, 126.8, 126.7, 124.5, 123.4, 123.2, 123.1. **HRMS (ESI):**  $[\text{M}+\text{H}]^+$  calculated for  $\text{C}_{29}\text{H}_{19}\text{N}_3\text{O}_3$ : 458.1499, found: 458.1497.

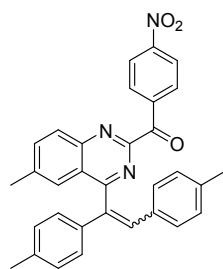

**(4-(1,2-Di-*p*-tolylvinyl)-6-methylquinazolin-2-yl)(4-nitrophenyl)methanone (4af)**

Yellow oil (40.4 mg, 81%), Z/E = 4.4:1.  $R_f = 0.5$  (PE/EA 5:1).  $^1\text{H NMR}$  (400 MHz, Chloroform-*d*)  $\delta$  8.21-8.15 (m, 2H), 8.08 (d,  $J = 8.8$  Hz, 2H), 7.94 (d,  $J = 8.8$  Hz, 2H), 7.79 (dd,  $J = 8.8, 2.0$  Hz, 1H), 7.74 (s, 1H), 7.41 (s, 1H), 7.17-7.10 (m, 6H), 6.94 (d,  $J = 8.0$  Hz, 2H), 6.78 (d,  $J = 8.0$  Hz, 2H), 2.45 (s, 3H, Z/E- $\text{CH}_3\text{C}_6\text{H}_3$ ), 2.34 (s, 3H, Z/E- $\text{CH}_3\text{C}_6\text{H}_4$ ), 2.27 (s, 3H, Z/E- $\text{CH}_3\text{C}_6\text{H}_4$ ).  $^{13}\text{C NMR}$  (150 MHz, Chloroform-*d*)  $\delta$  190.5, 169.6, 157.2, 150.3, 149.6, 141.1, 140.8, 138.5, 138.1, 137.8, 137.6, 137.0, 136.6, 133.7, 132.5, 132.4, 132.2, 130.2, 130.0, 130.0, 129.9, 129.8, 129.5, 129.3, 129.2, 126.7, 125.8, 124.9, 123.4, 123.3, 22.4, 21.5, 21.5. **HRMS (ESI):**  $[\text{M}+\text{H}]^+$  calculated for  $\text{C}_{32}\text{H}_{25}\text{N}_3\text{O}_3$ : 500.1969, found: 500.1968.

## VII. References

- [1]. (a) B. F. Sabrina, S. C. Marilia, B. Nubia, J. S. B. Romulo, S. G. Marcelo, M. C. Marilene, B. K. Warner and F. F. Vitor, *Eur. J. Med. Chem.* 2007, **42** (11-12), 1388-1395; (b) L. Ruizhi, W. Xiaohua, L. Songyang, Z. Chen, H. Maoyao, C. Yuncan, W. Qiantao, H. Li and W. Yong, *Chem. Commun. (Camb)* 2019, **55** (28), 4039-4042.
- [2]. (a) C. Shuting, Z. Jing, L. Yongxin and L. Xuewei, *RSC Advances* 2014, **4** (14),

- 7275-7278; (b) D. N. Eric and H. L. Tristan, *Org. Lett.* 2013, **15**, 38-41.  
 [3]. H. Feng and S. Michal, *Chem. Commun. (Camb)* 2016, **52**, 9715-9718.  
 [4]. (a) R. K. Alan, A. A. A. Ashraf and G. A. Rena, *ARKIVOC* 2005, (vi), 329-338.  
 (b) R. C. Peter, K. J. Wit and H. P. Rolf, *Aust. J. Chem.* 1989, **42**, 549-559.  
 [5]. D. K. Gregory and L. H. Kami, *ACS Catal.* 2017, **7**, 6220-6224.  
 [6]. K. Lingheng, Z. Xukai, X. Youwei and L. Xingwei, *Org. Lett.* 2017, **19** (13), 3644-3647.

## VIII. NMR Spectra of Coupled Products

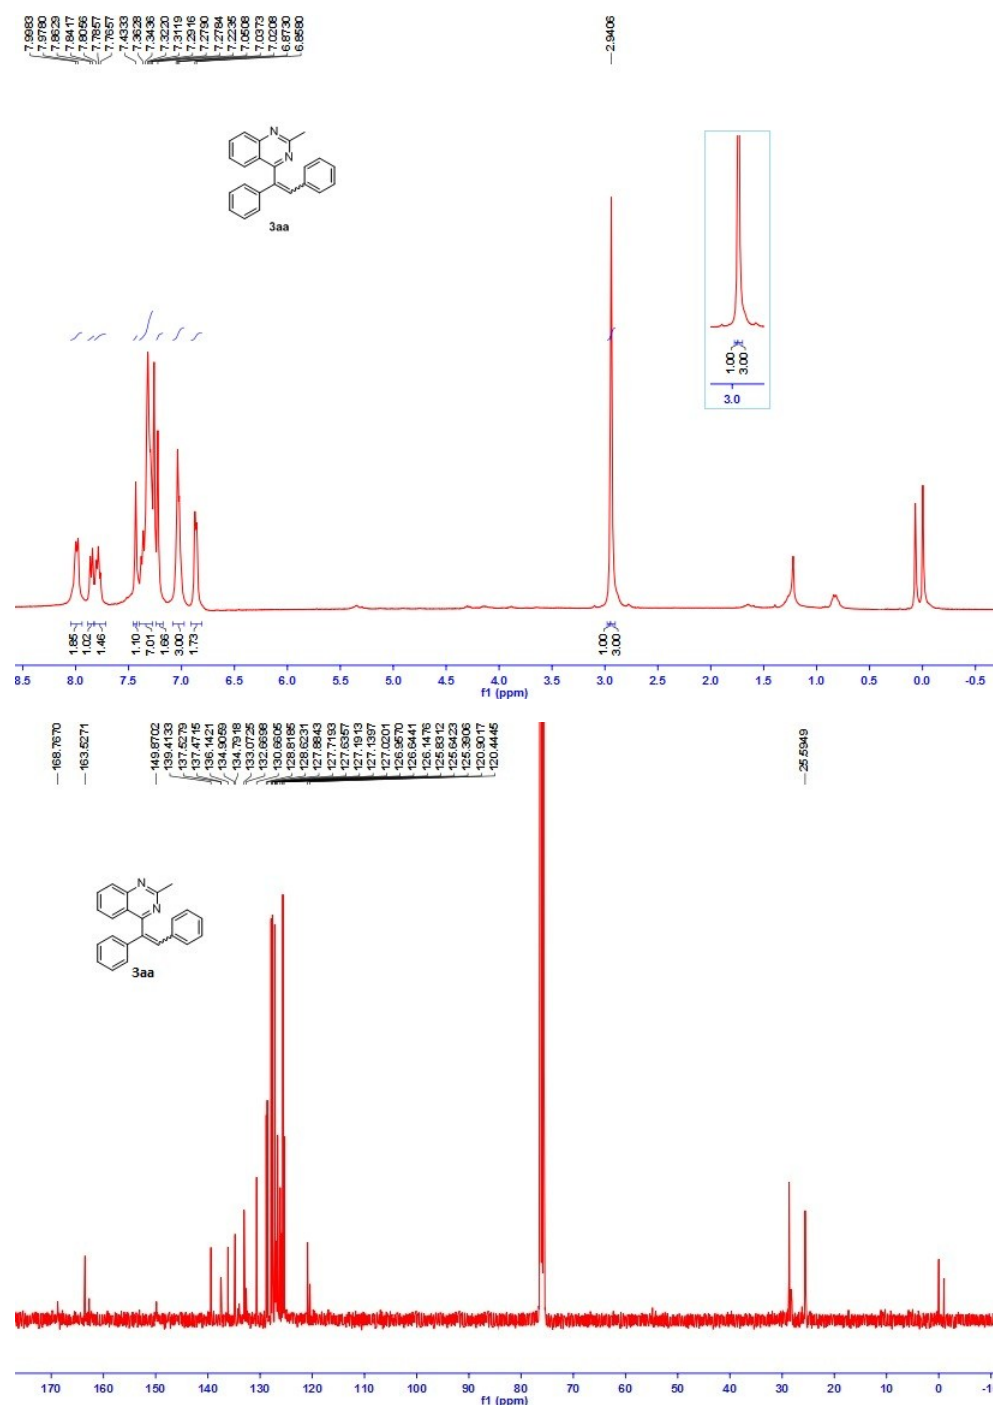

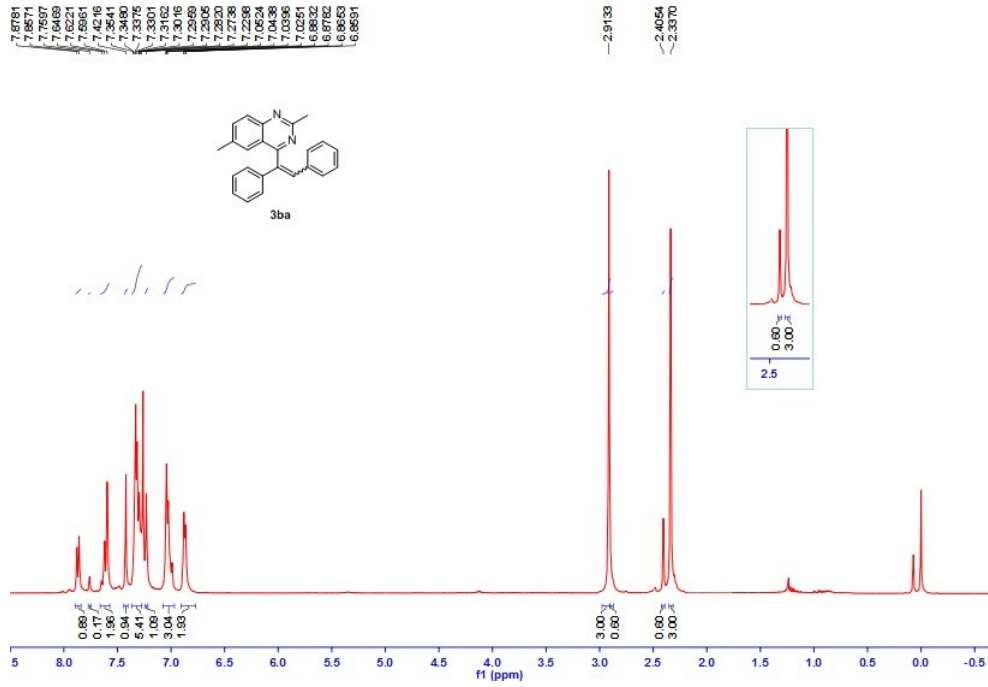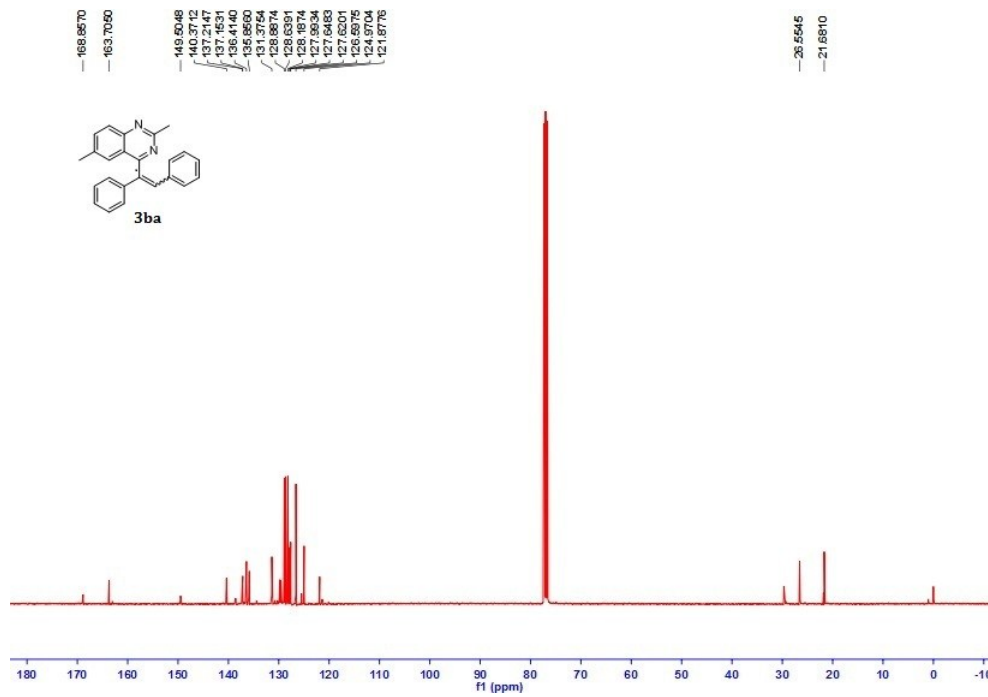

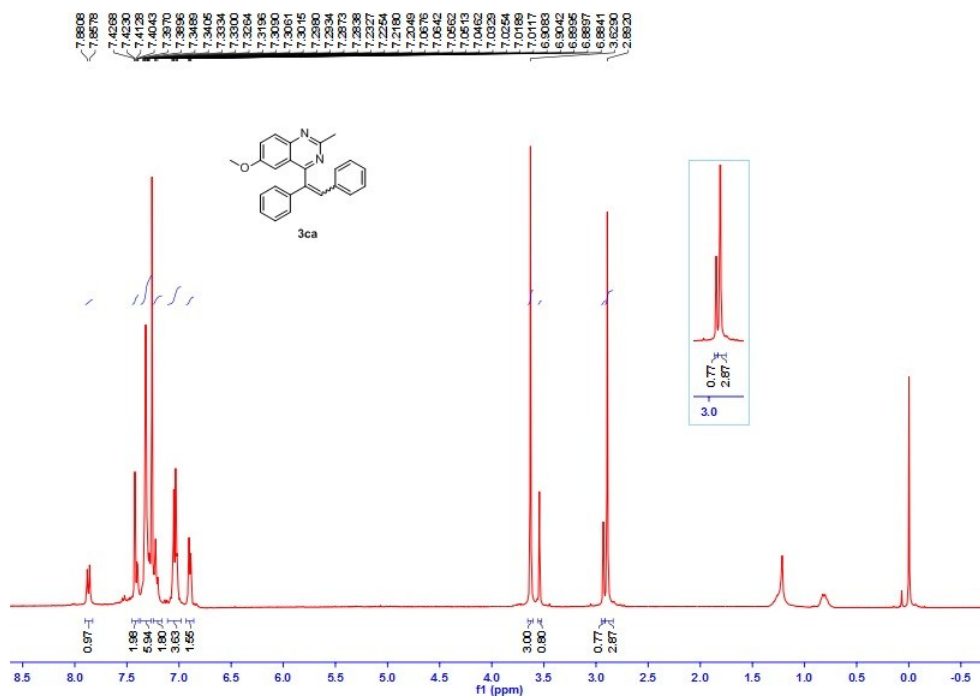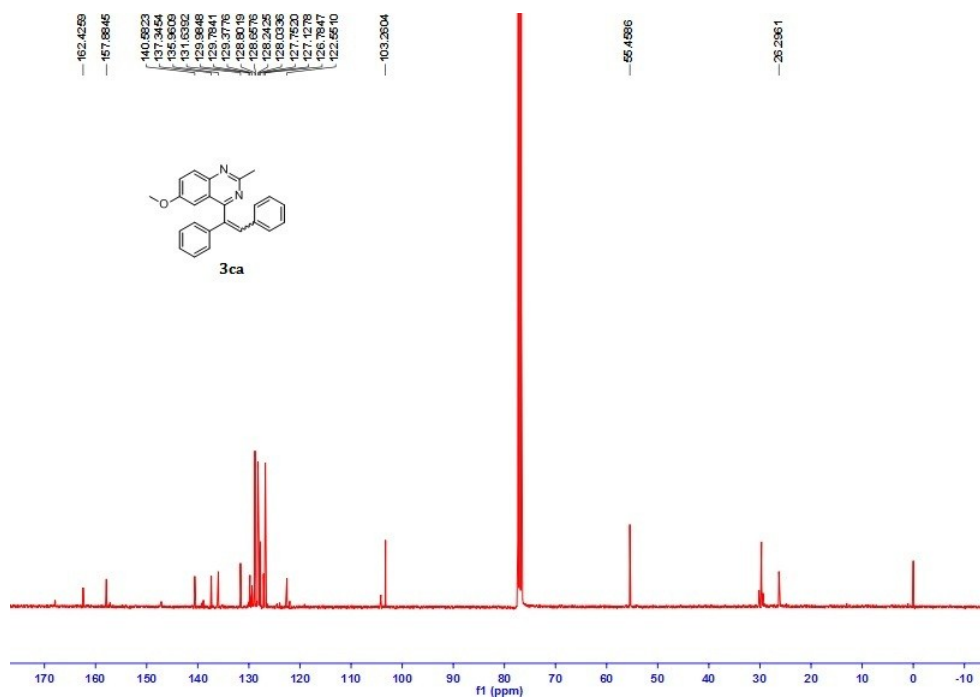



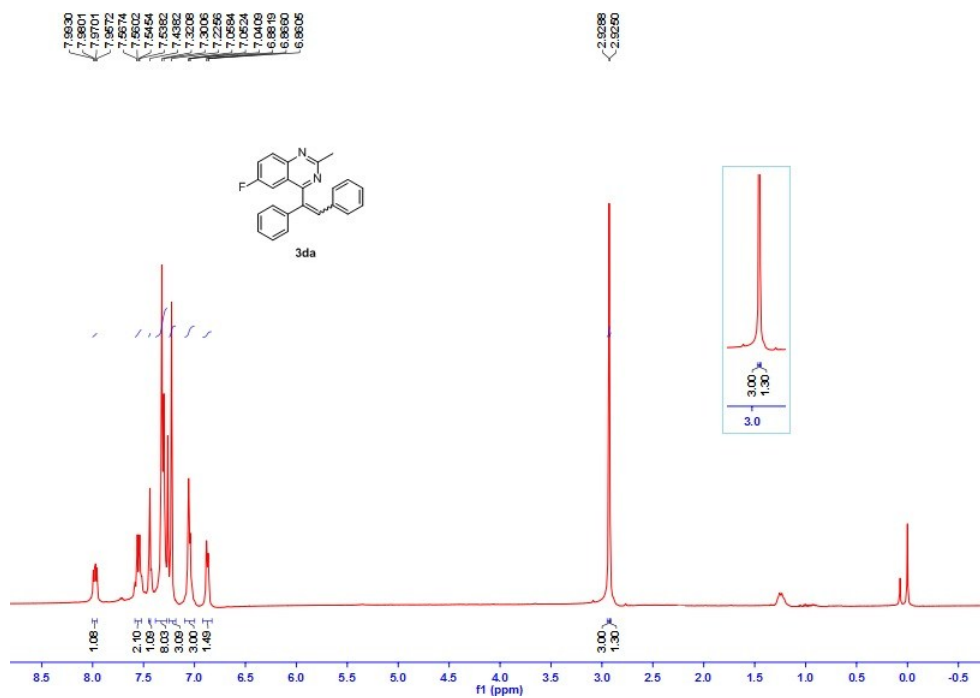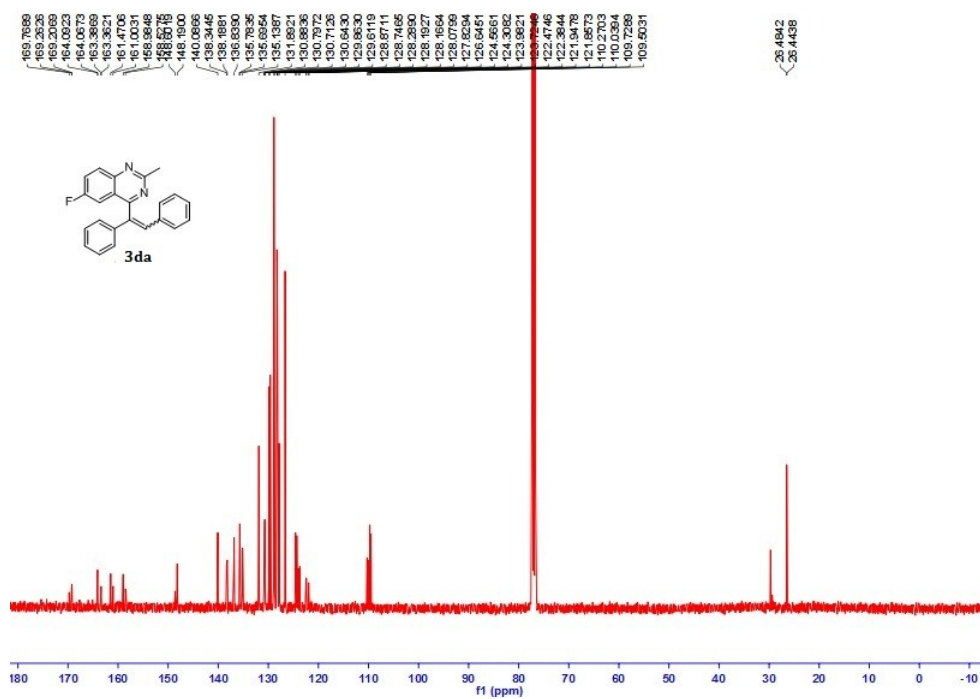

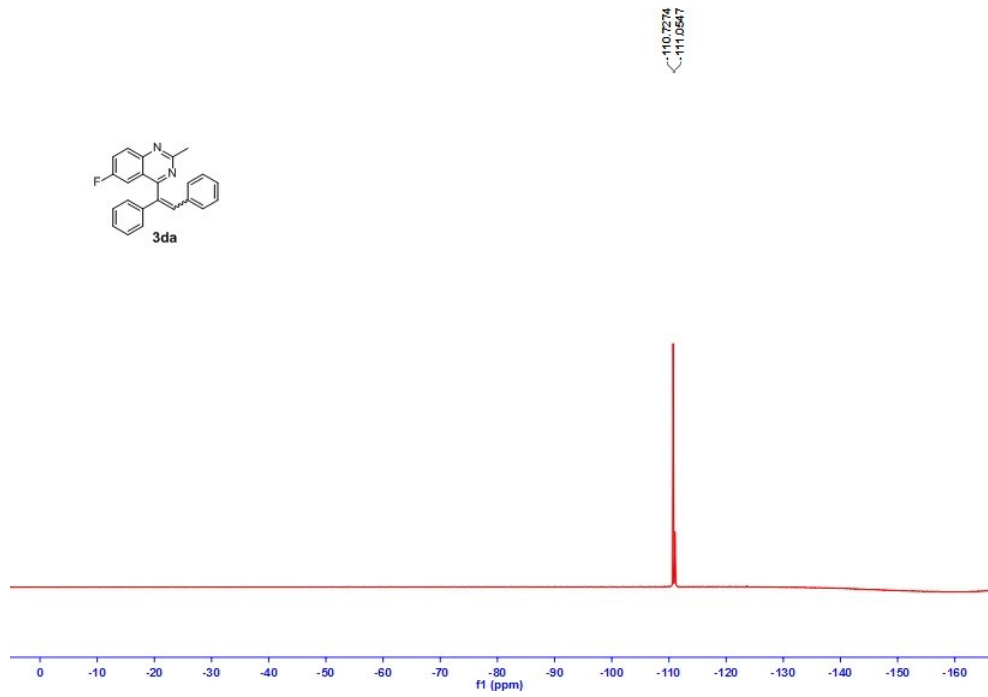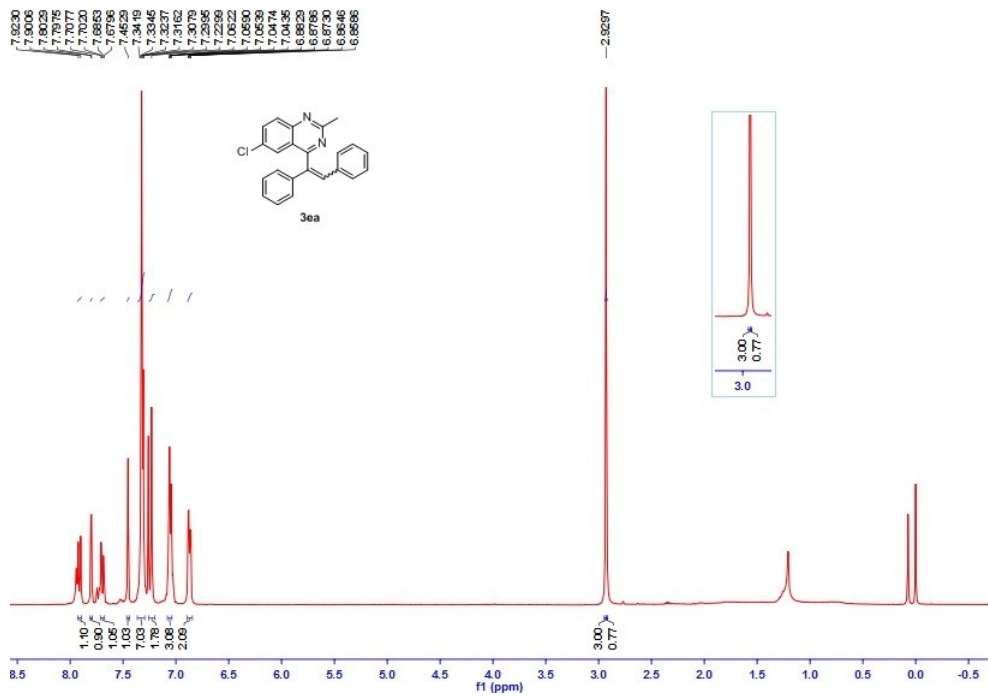

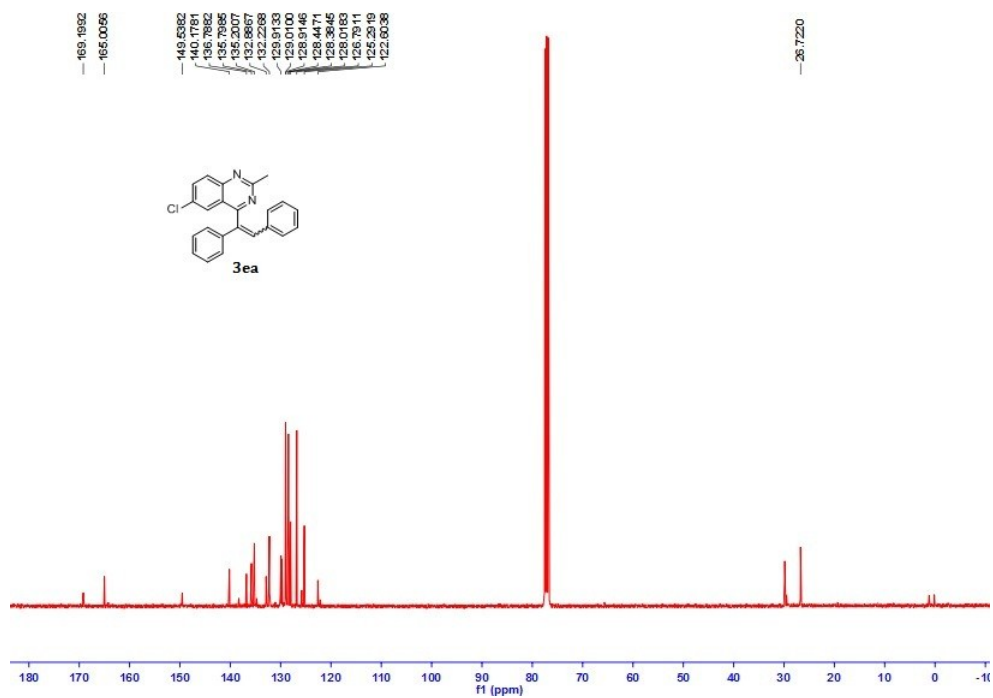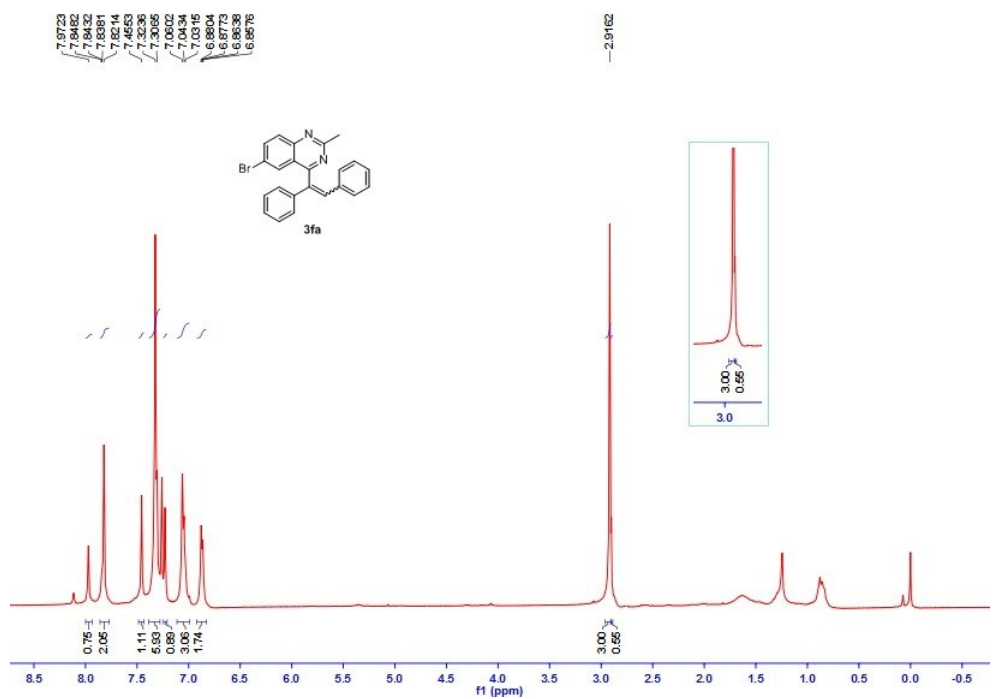

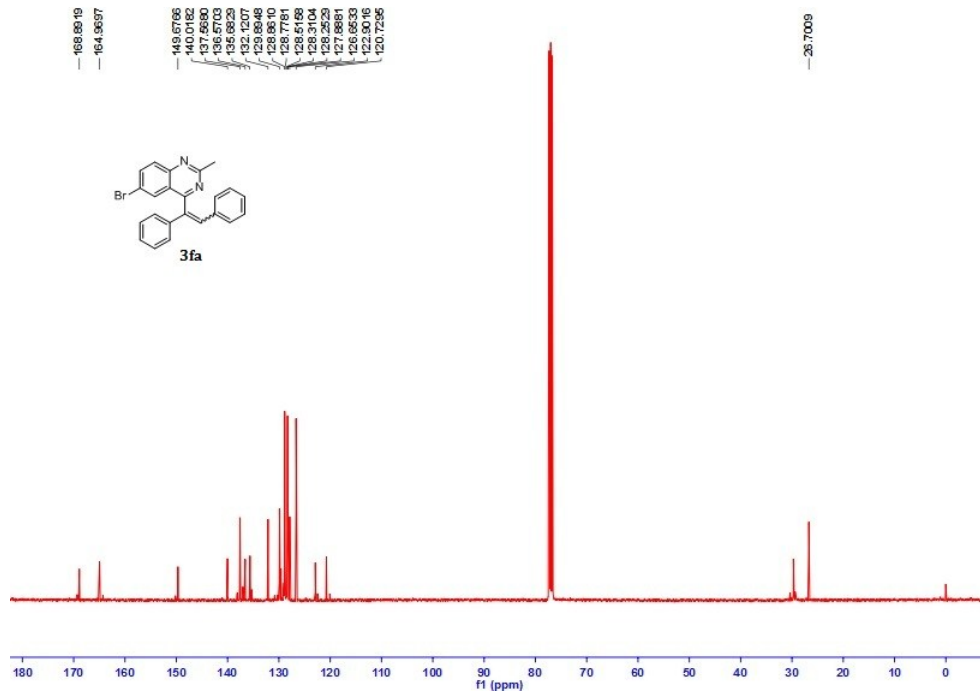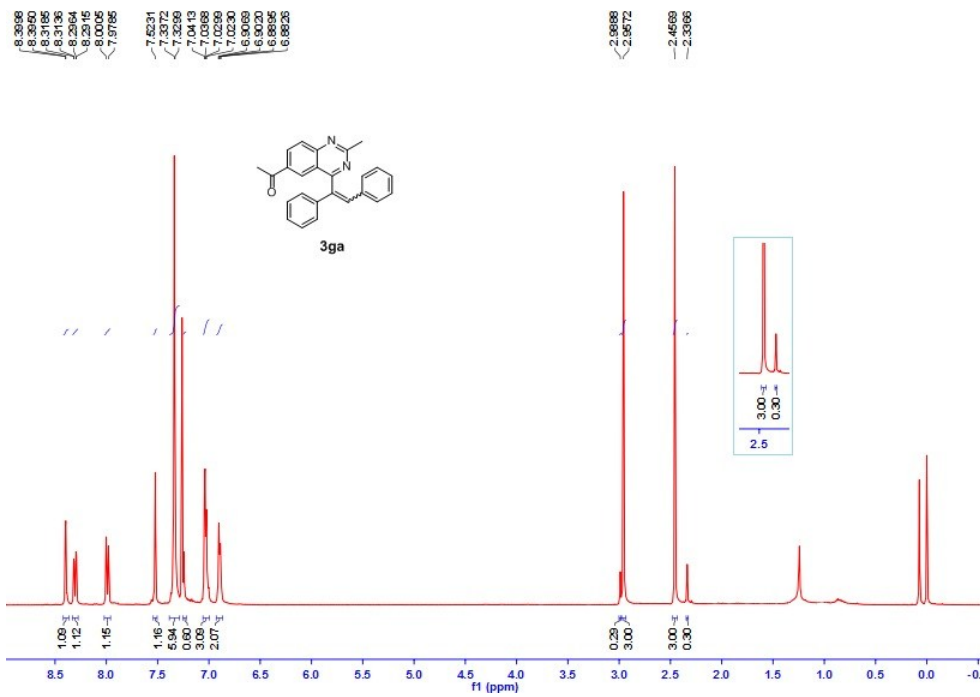

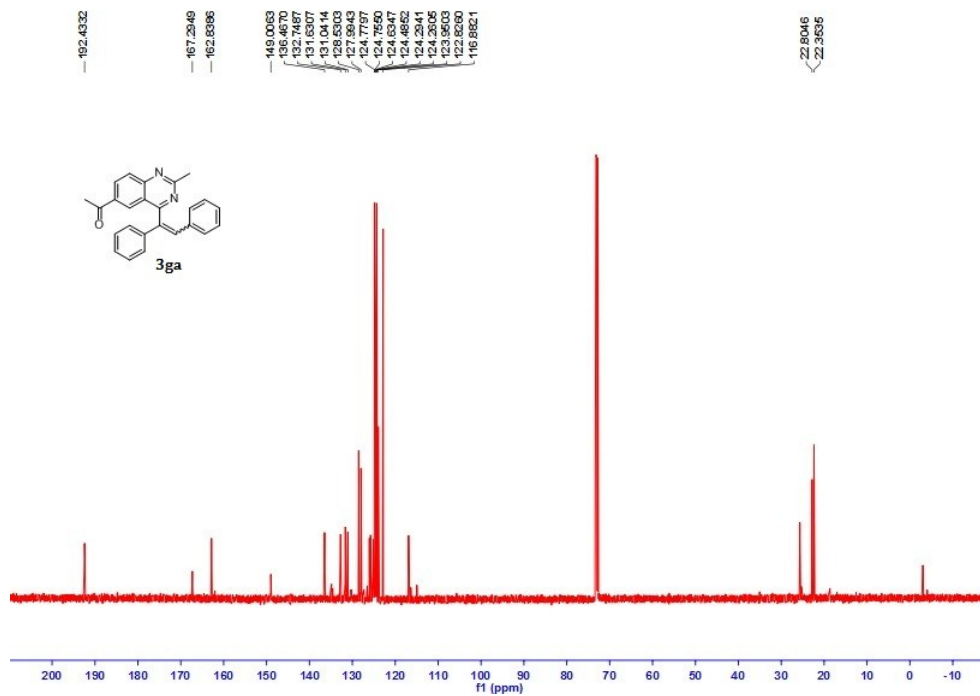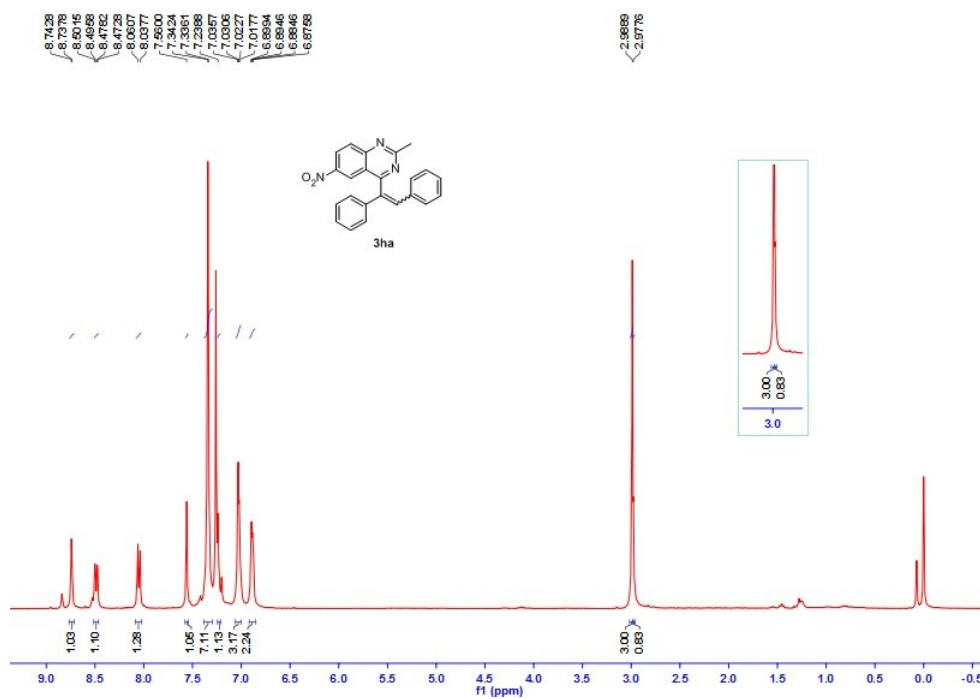

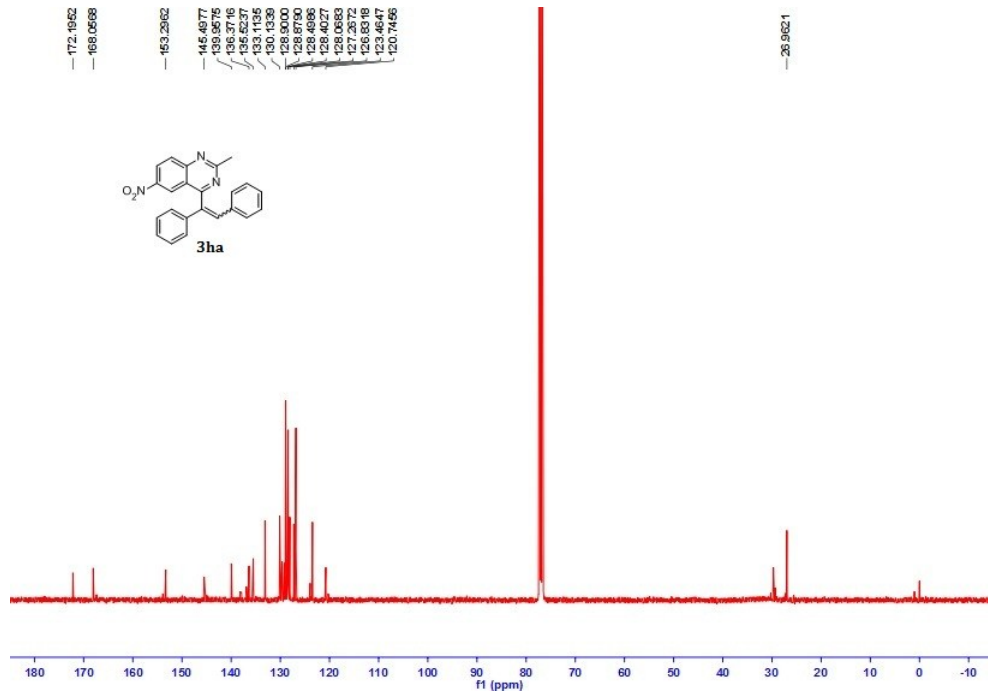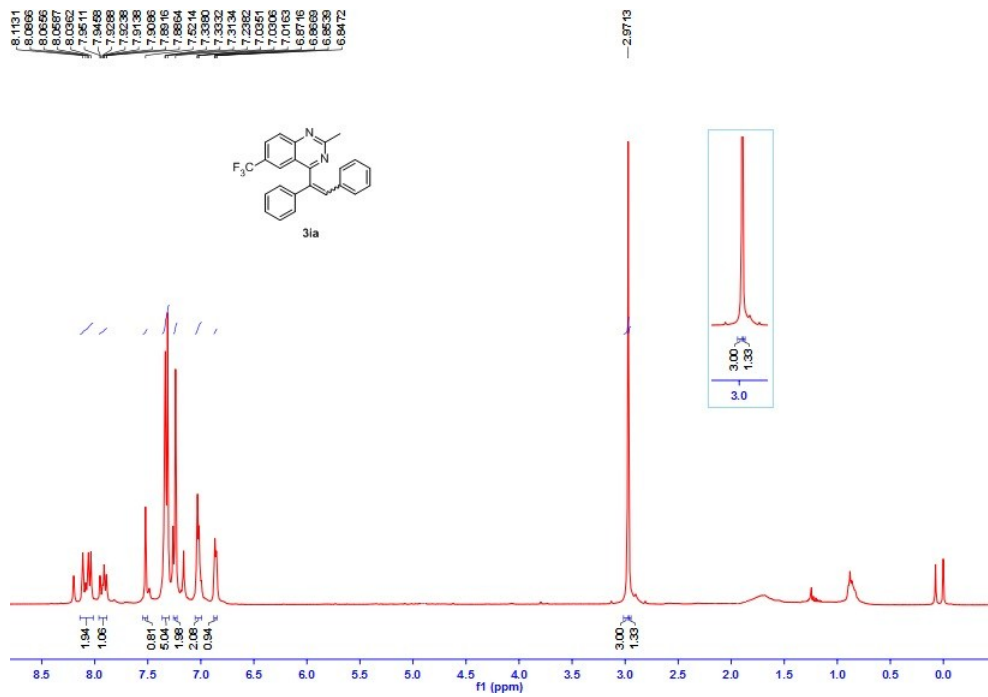

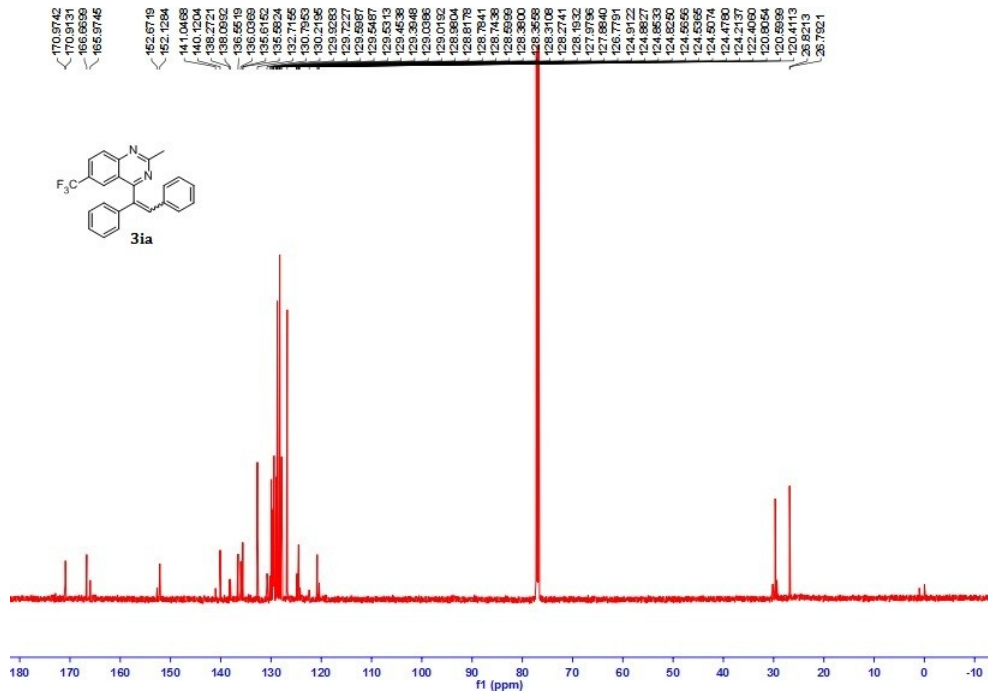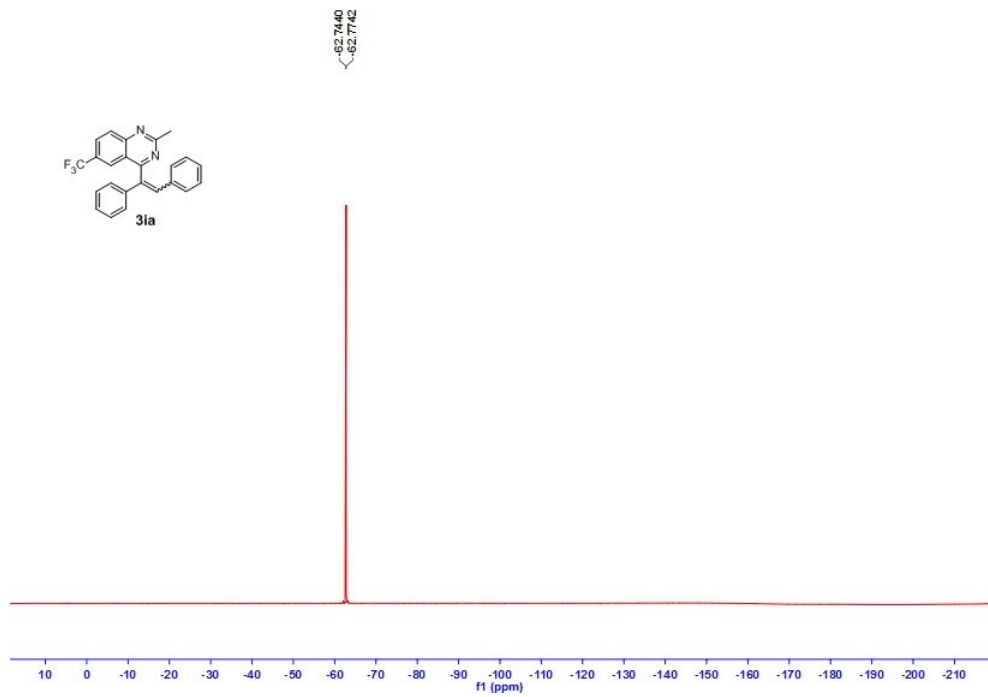

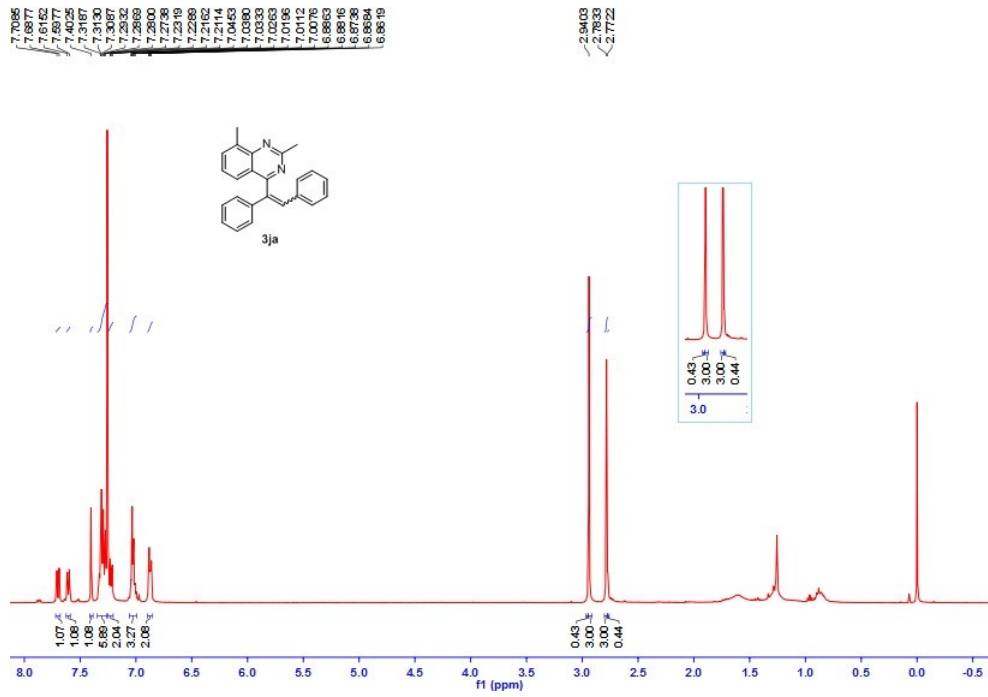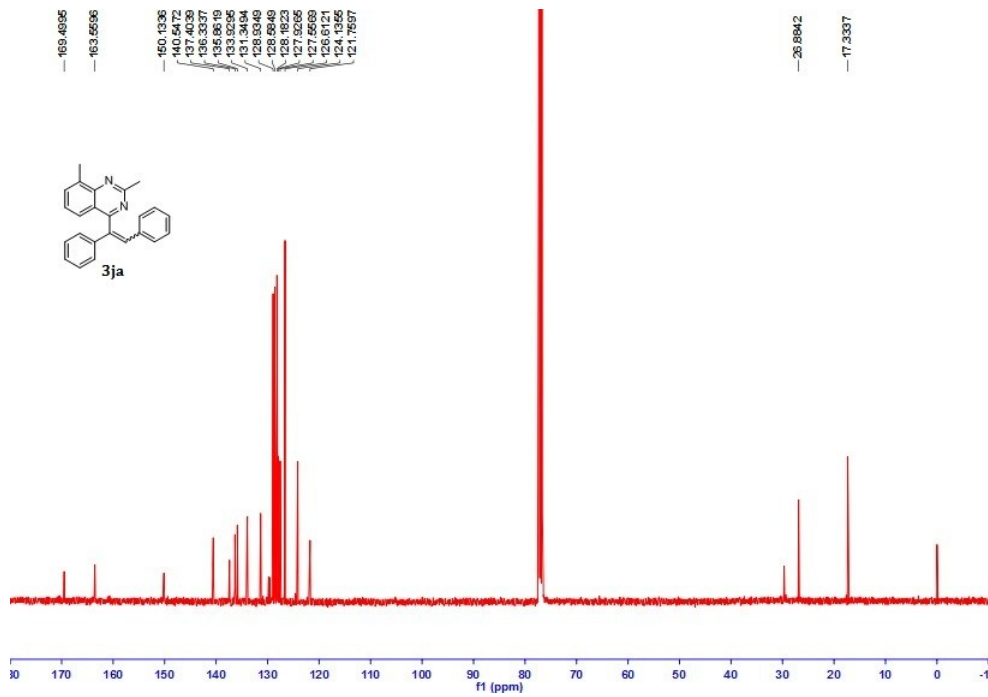



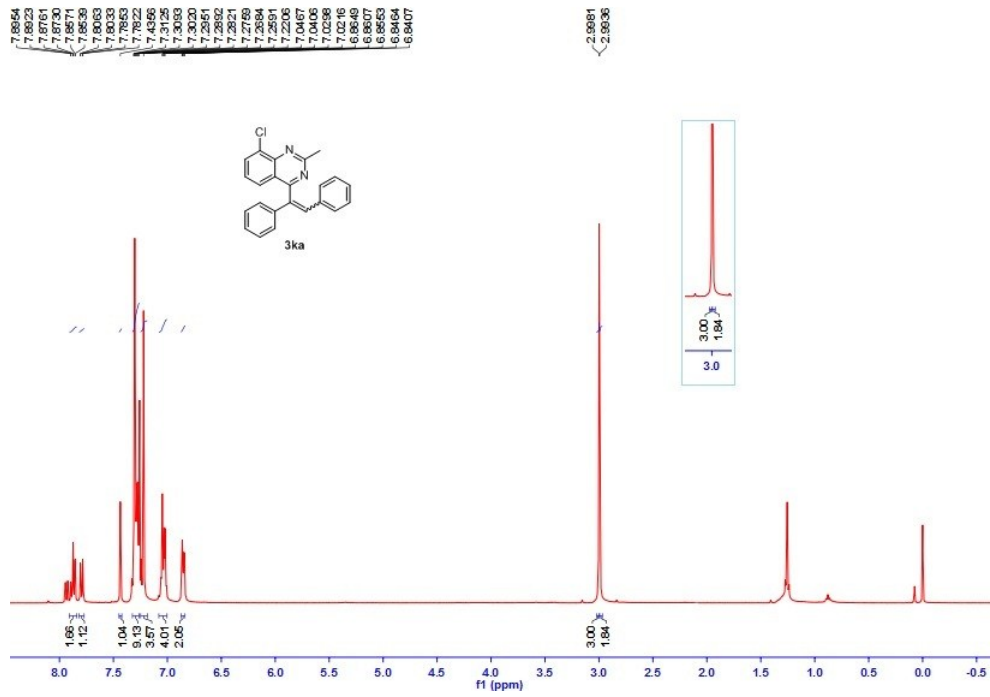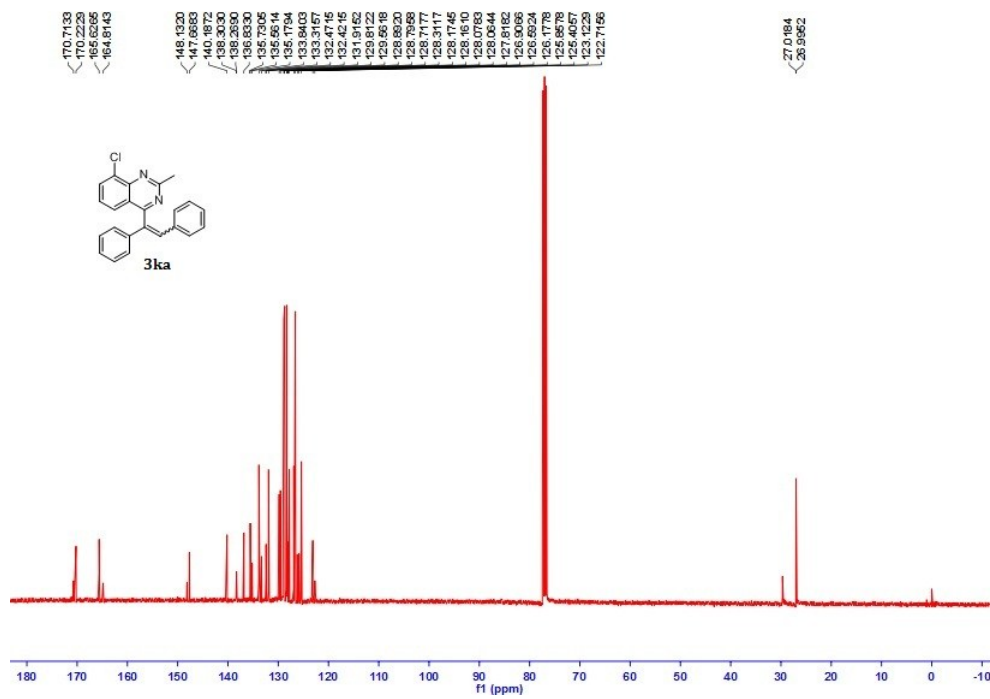

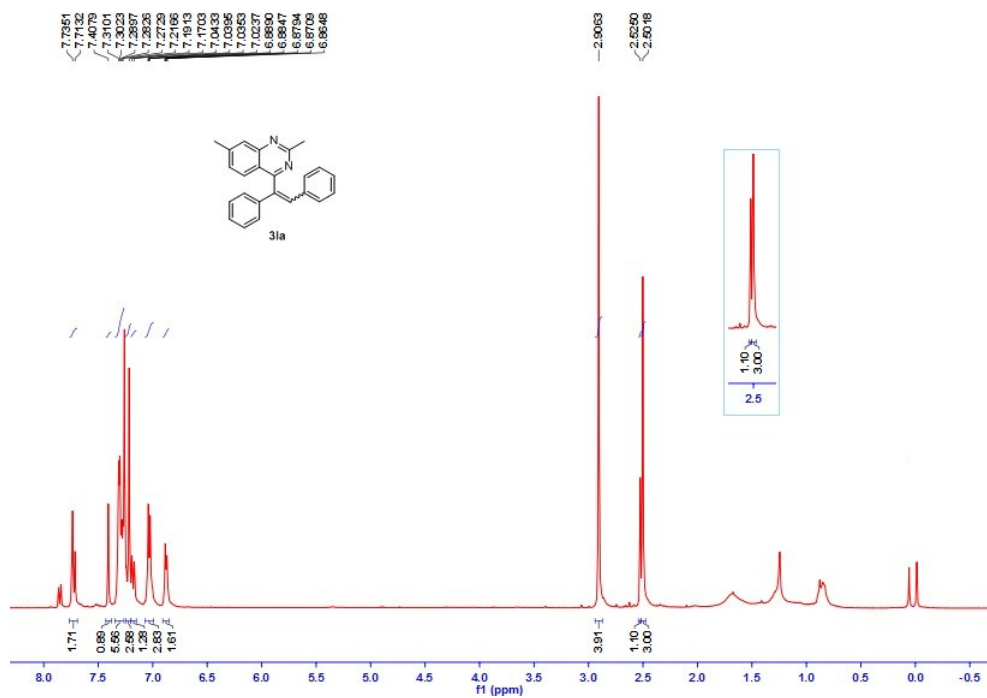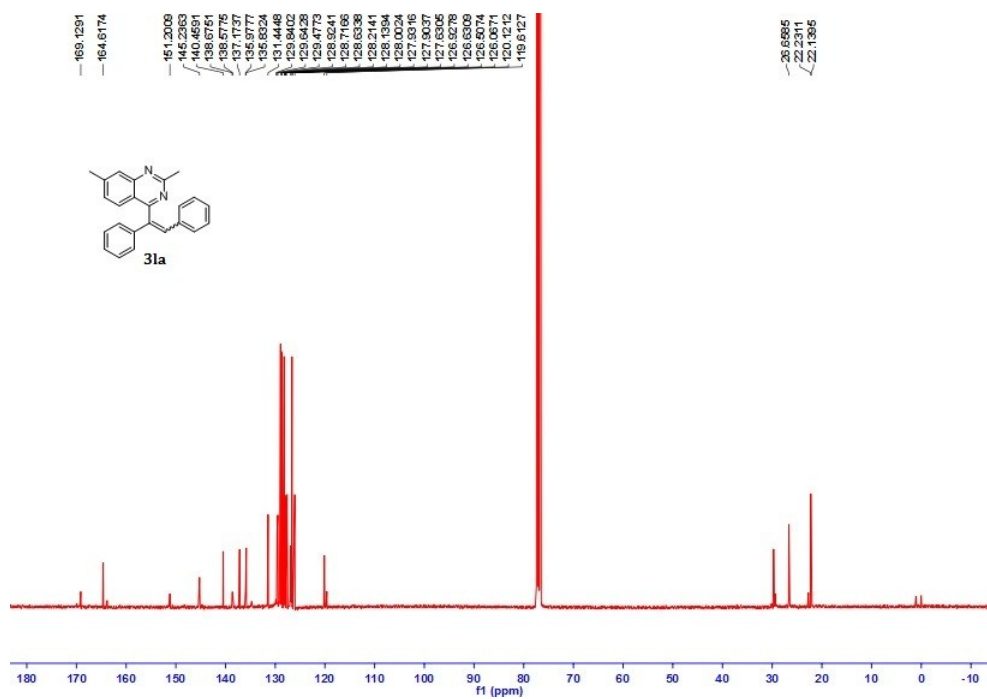

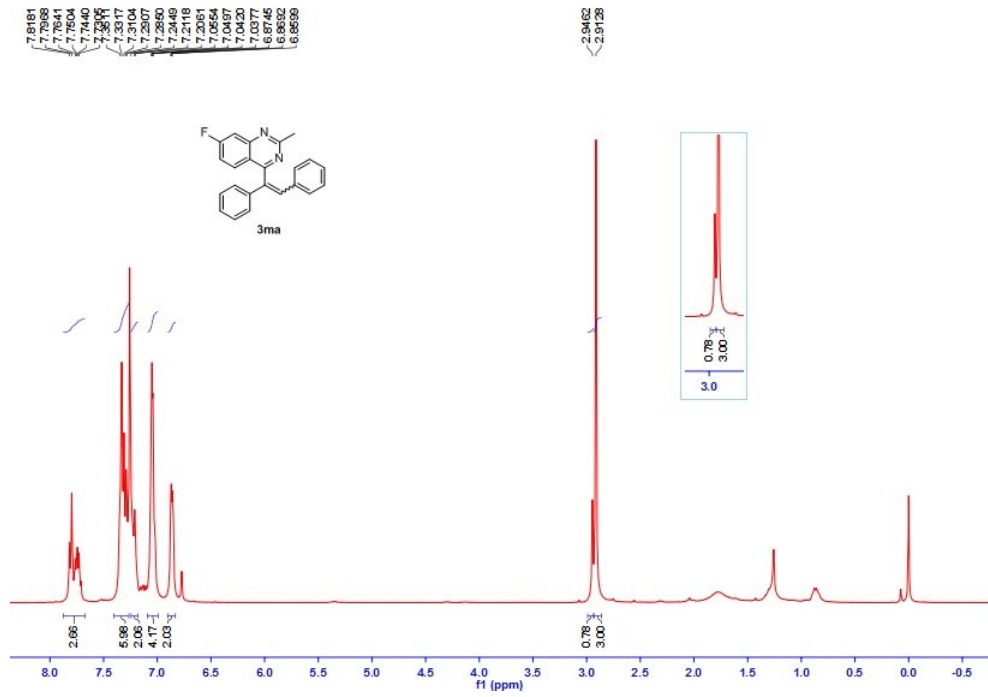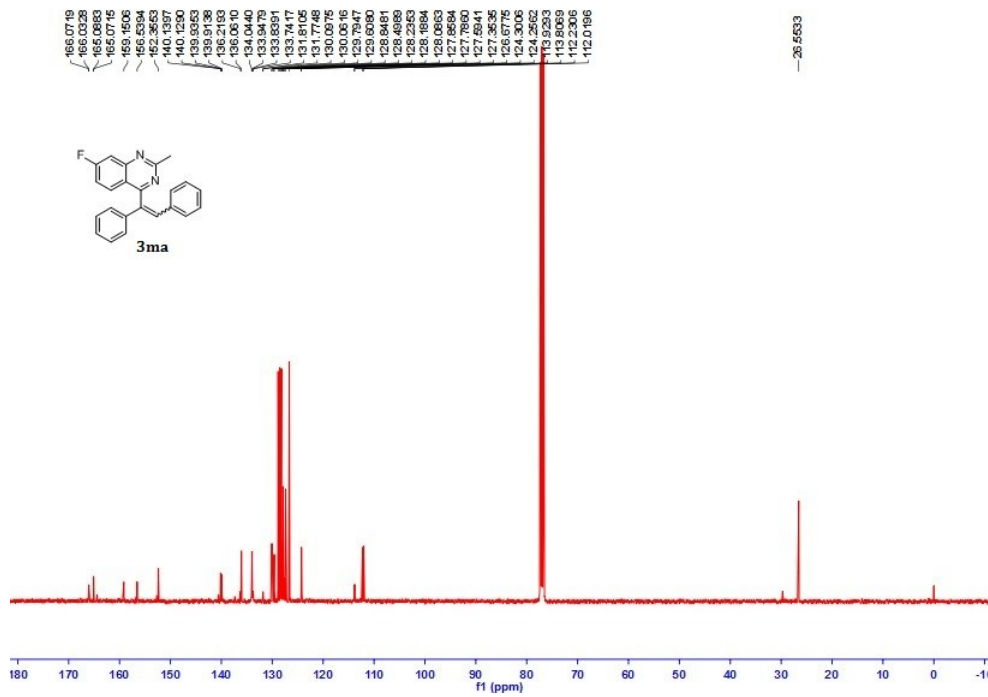

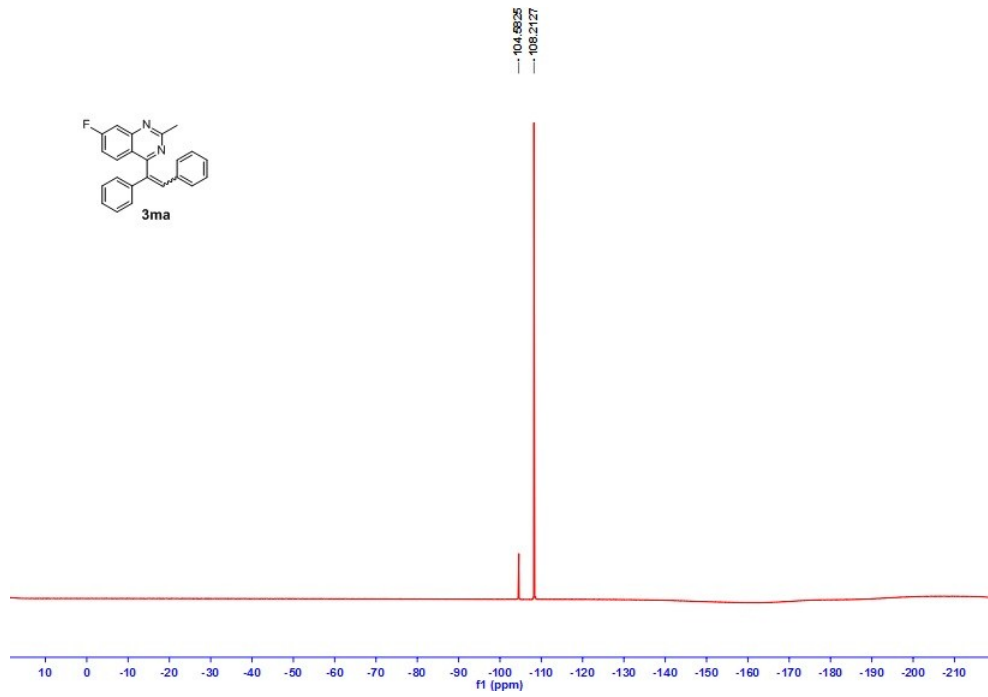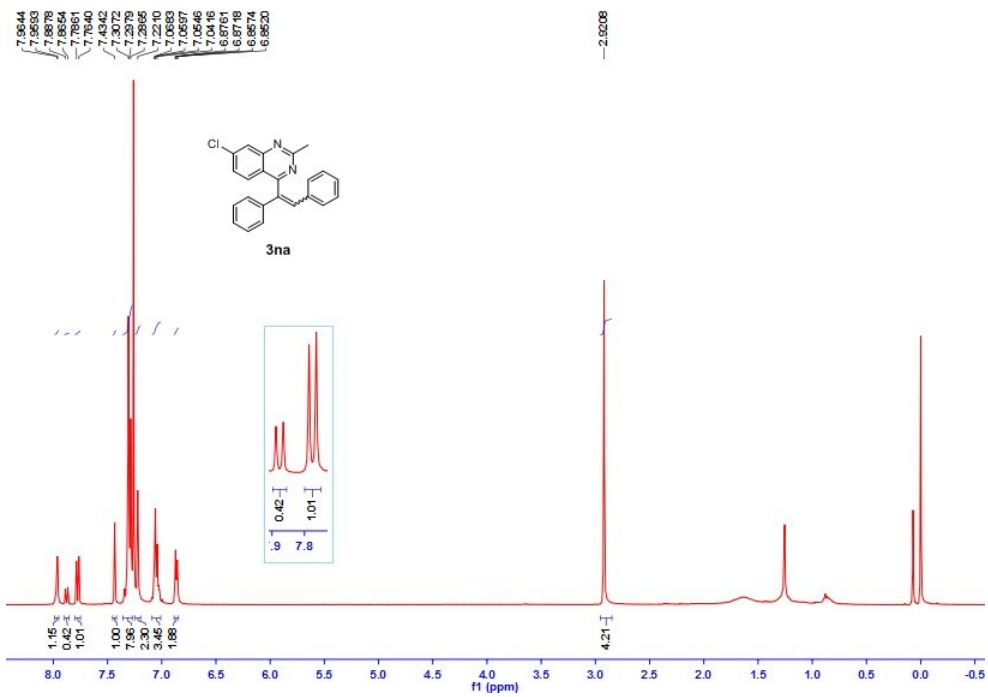

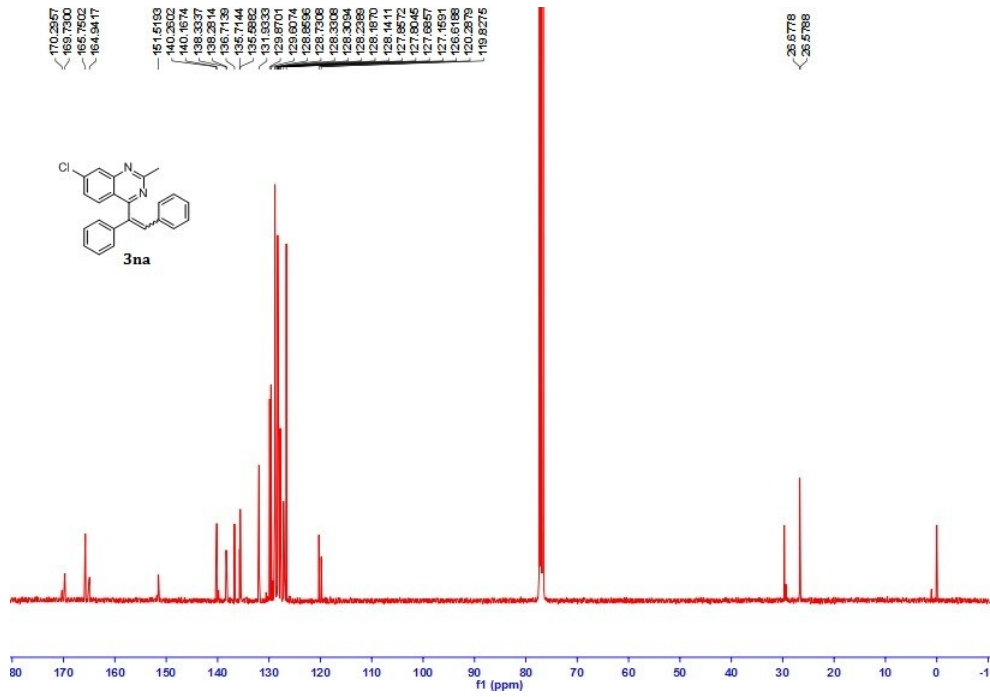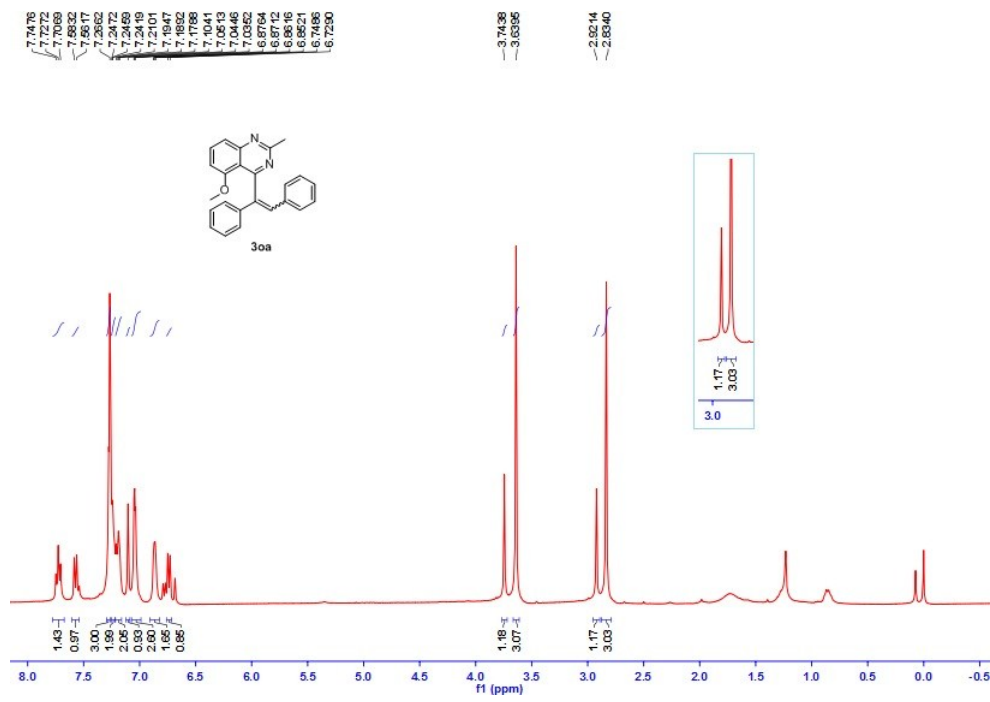

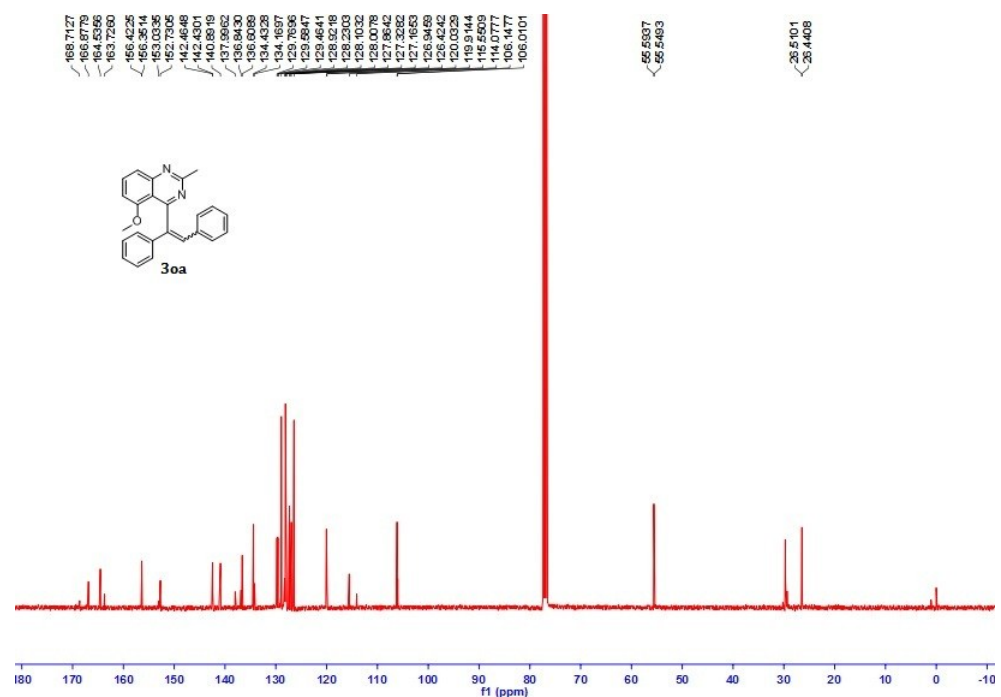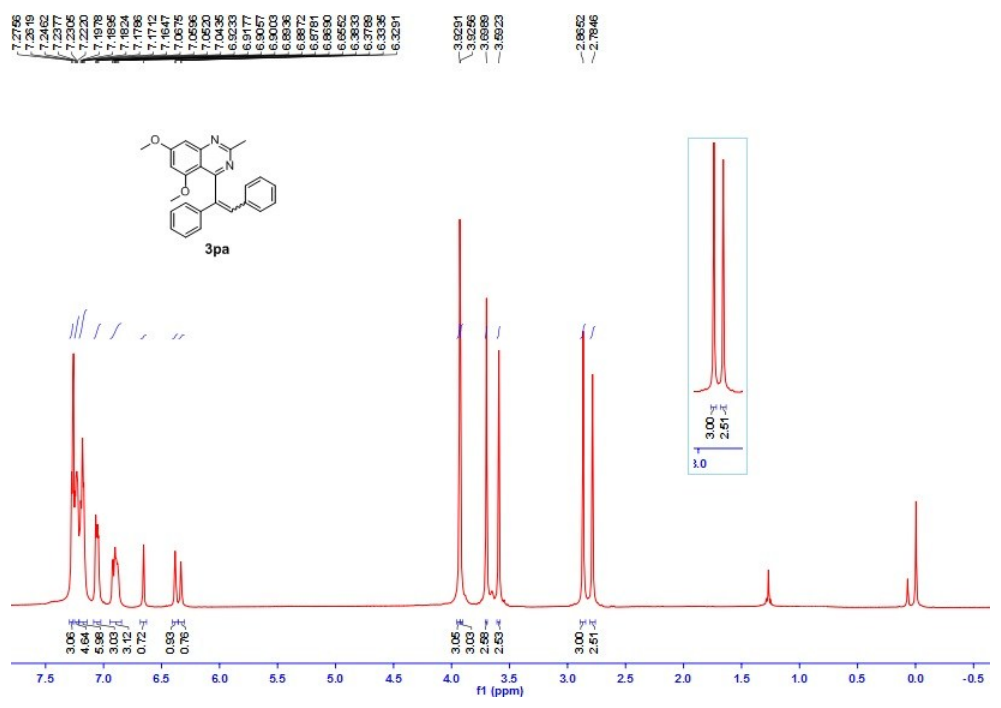

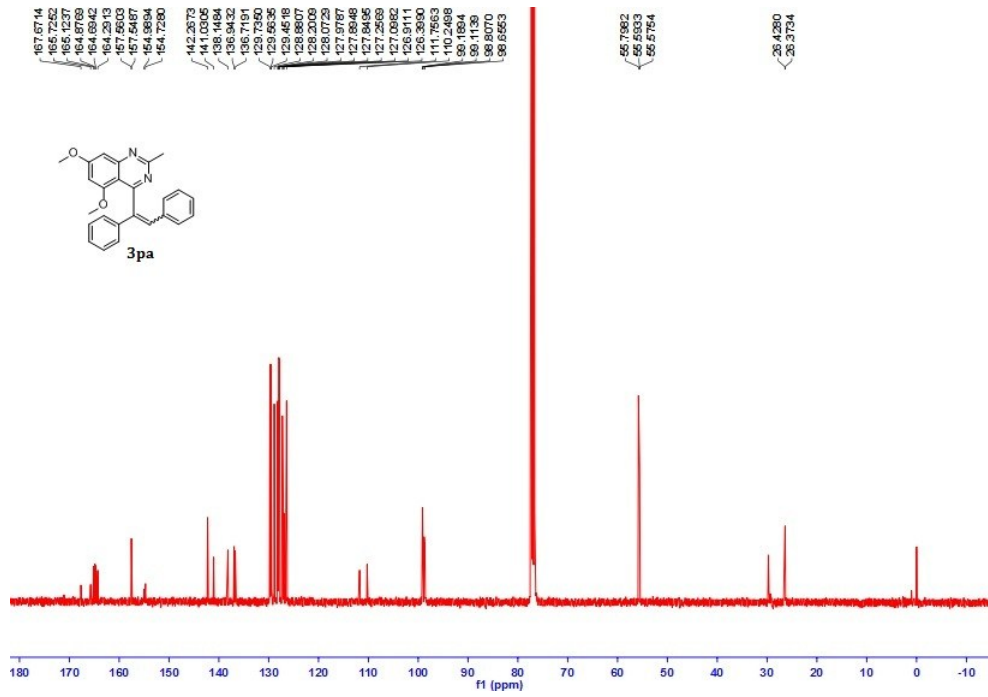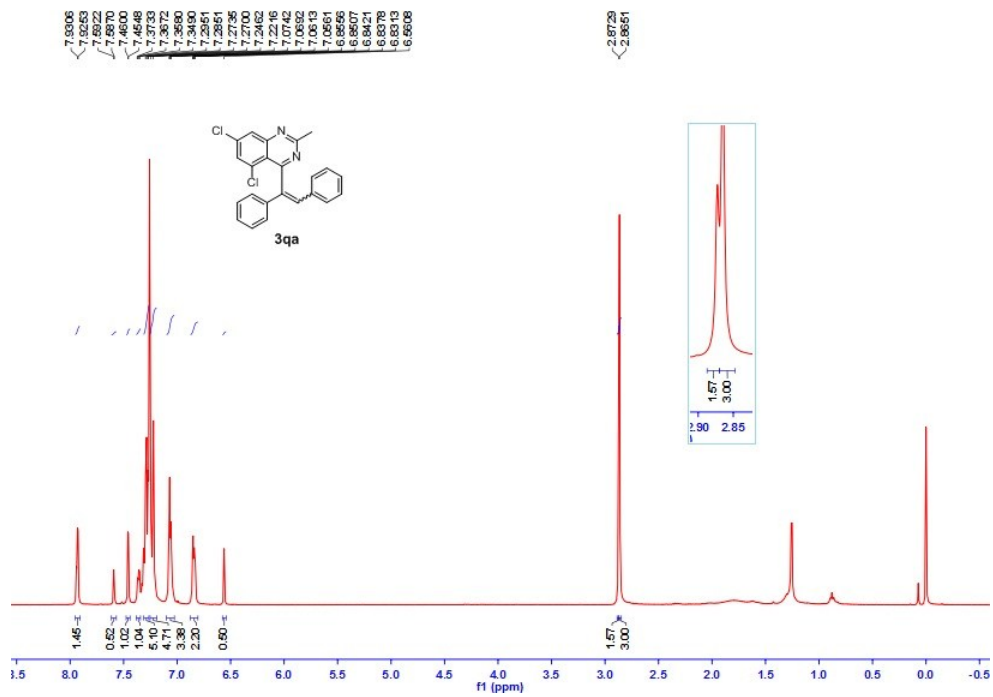

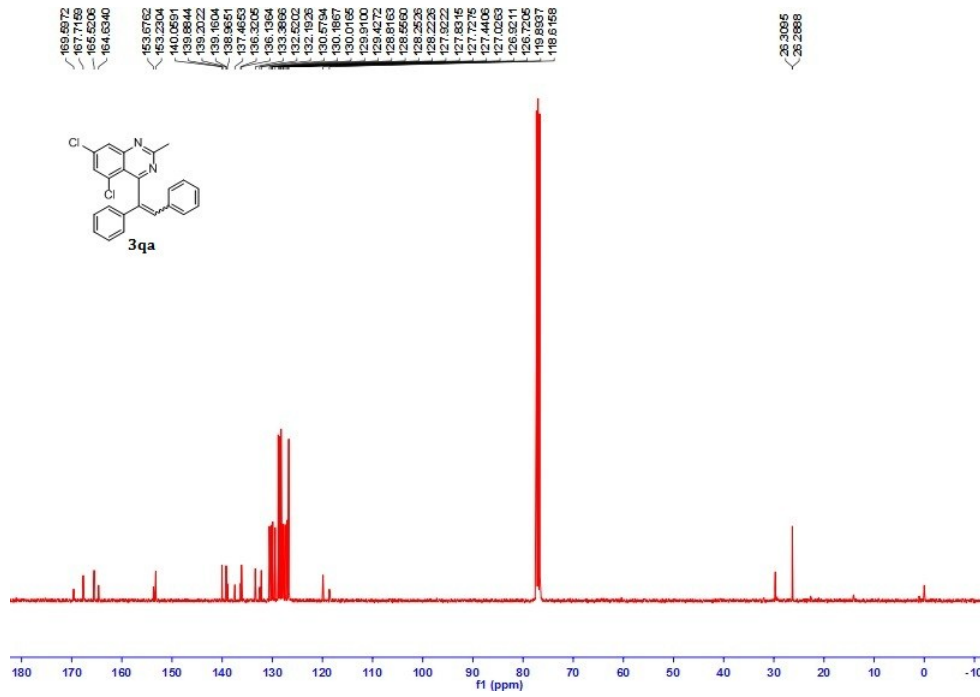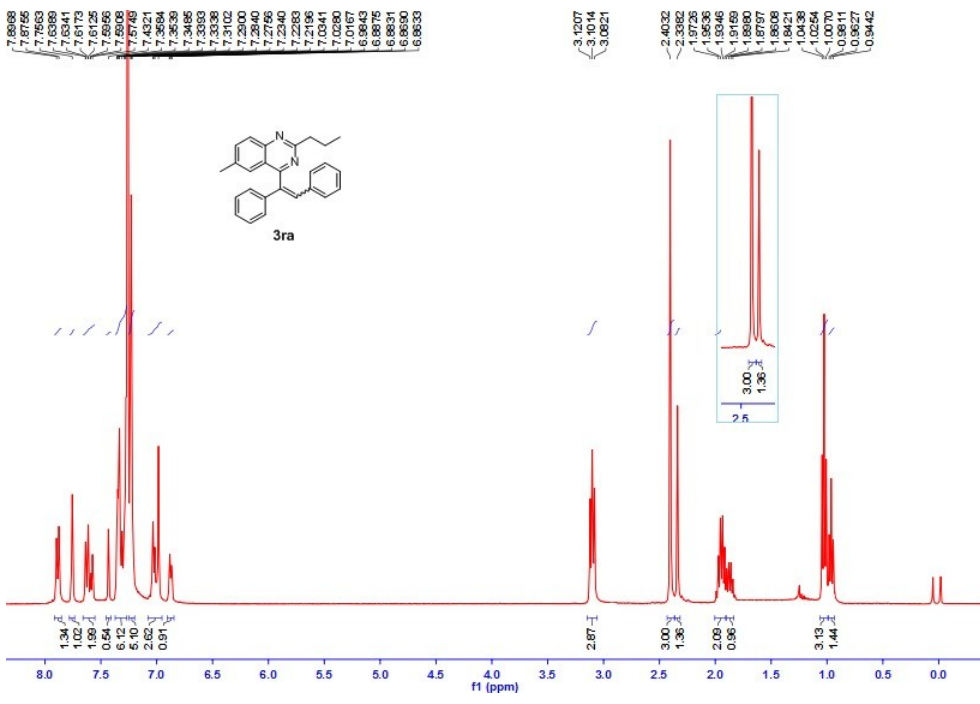



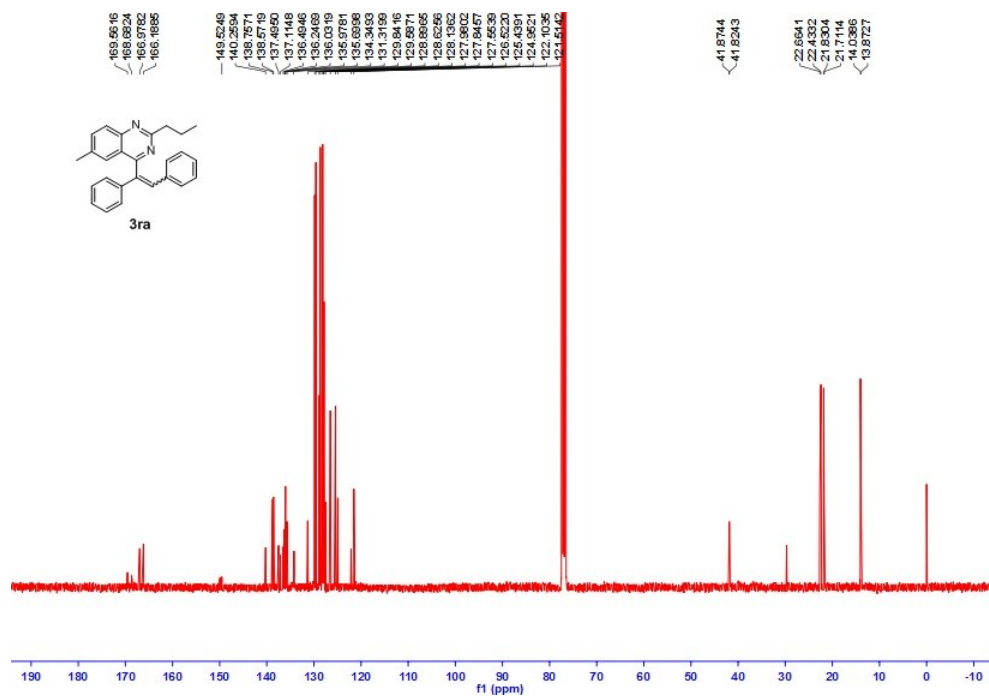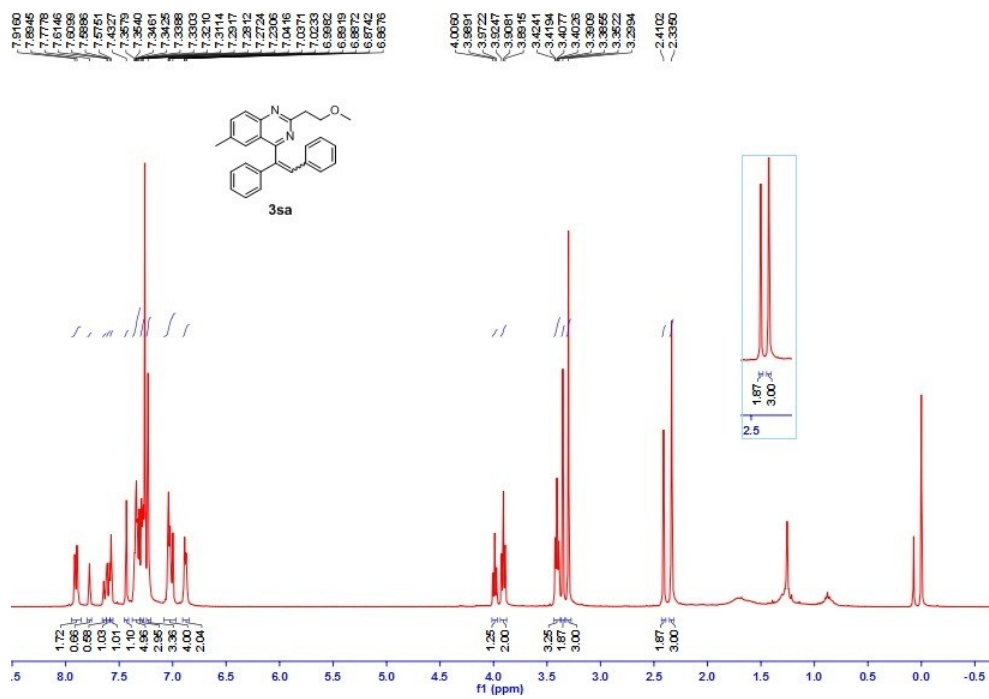

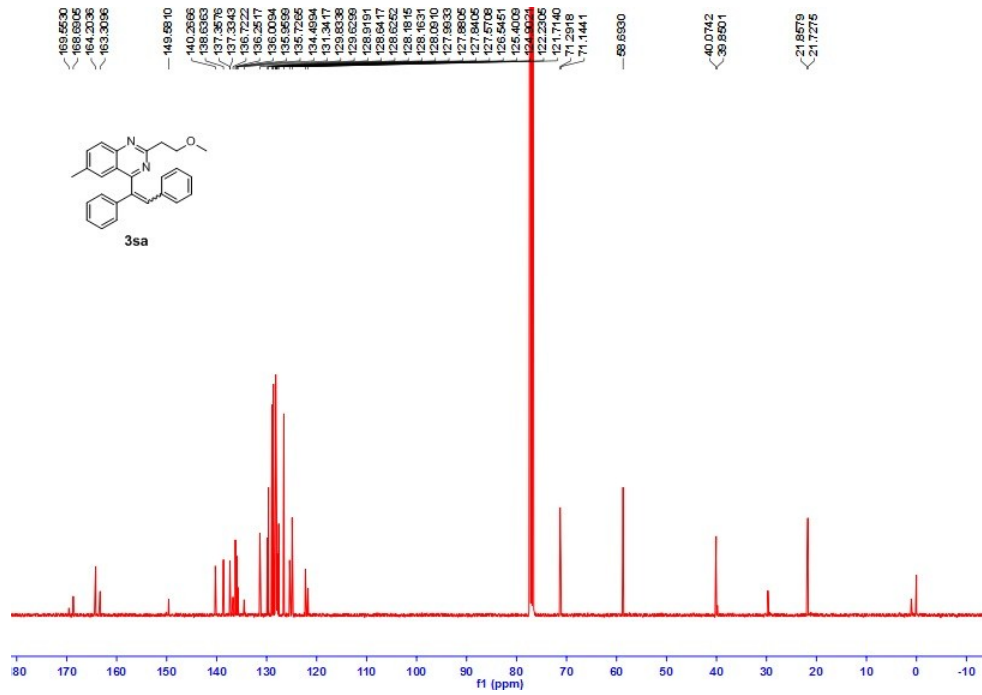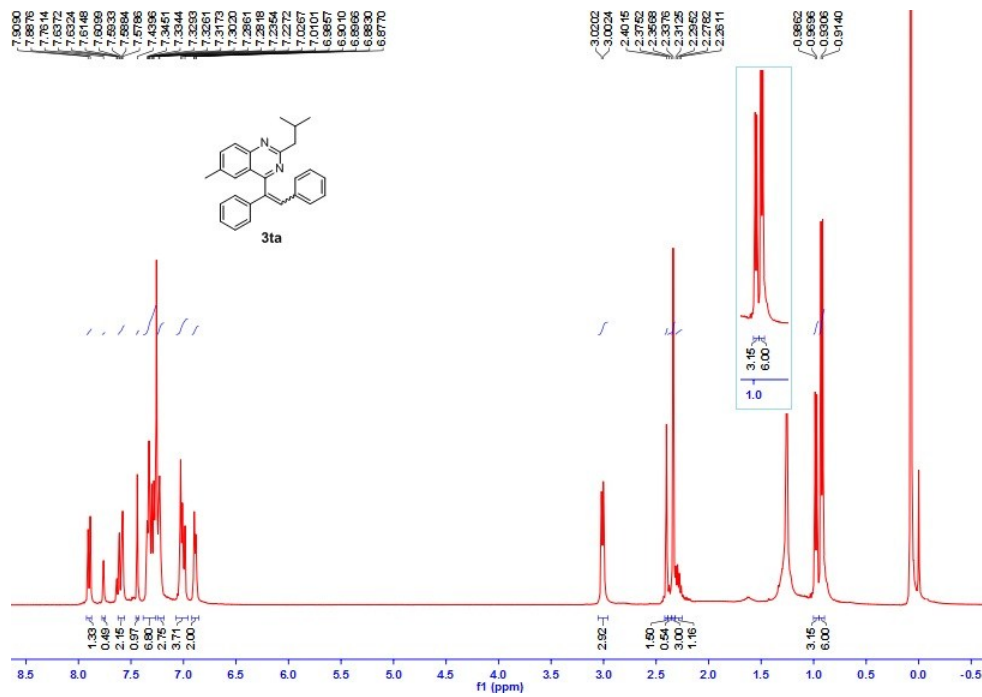

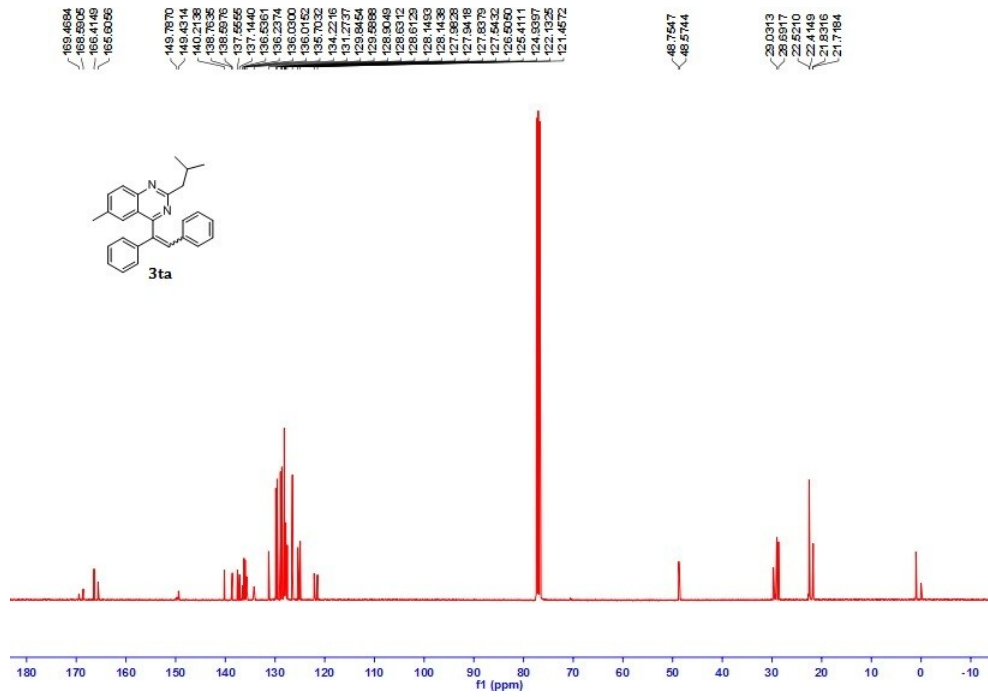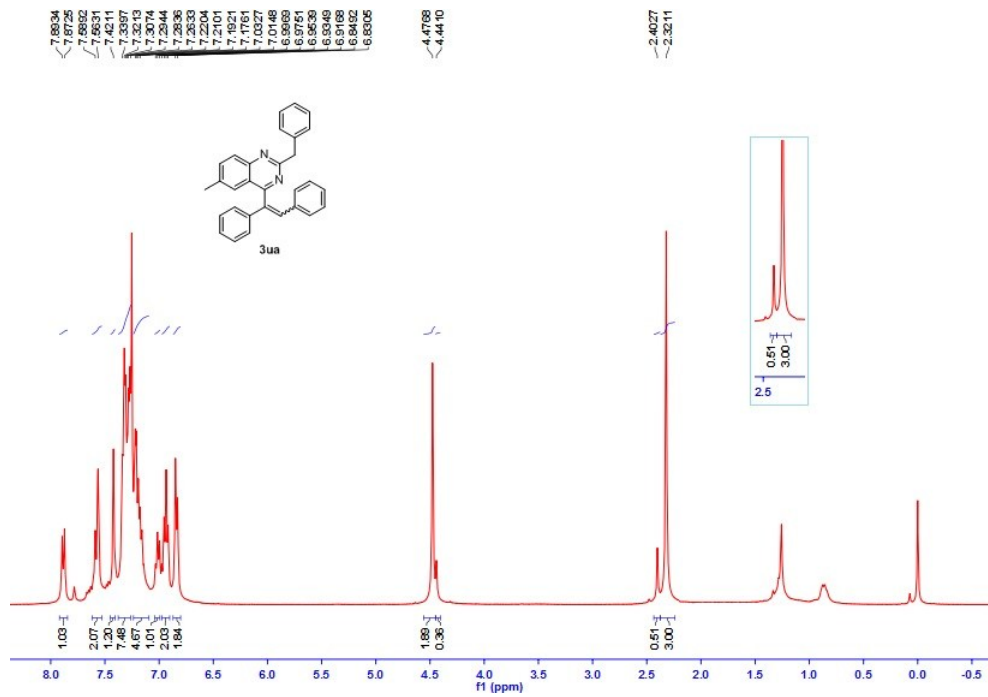

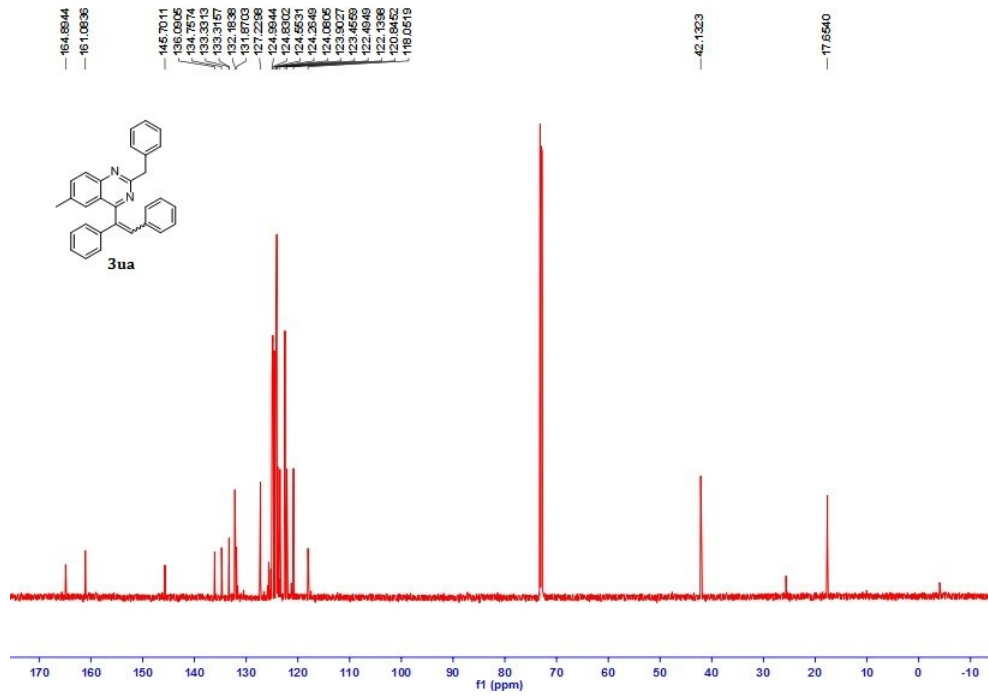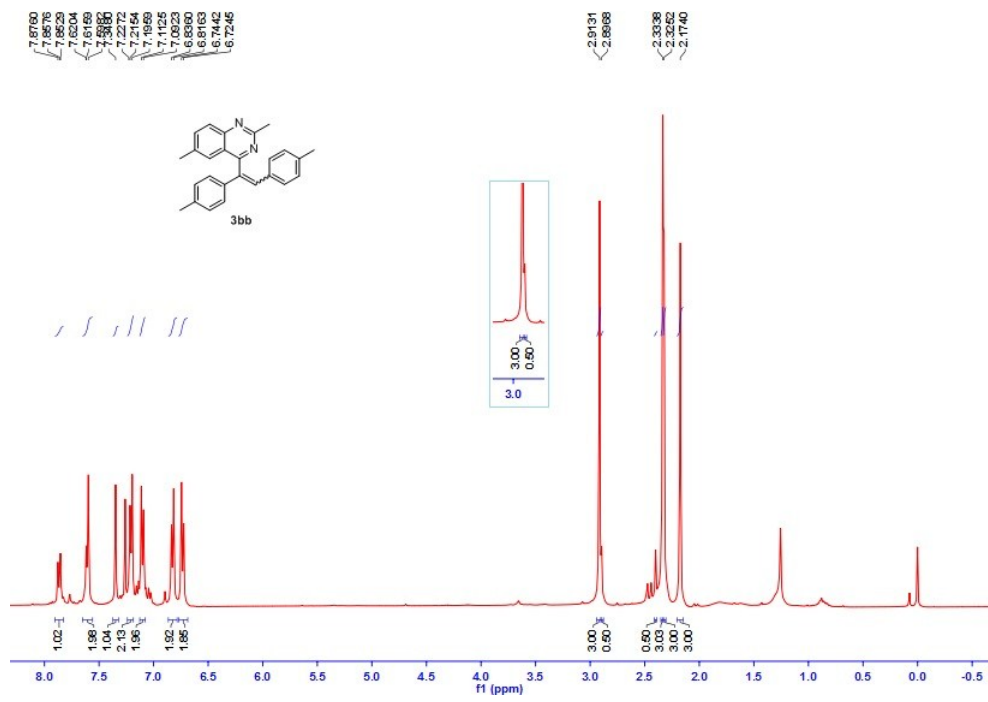

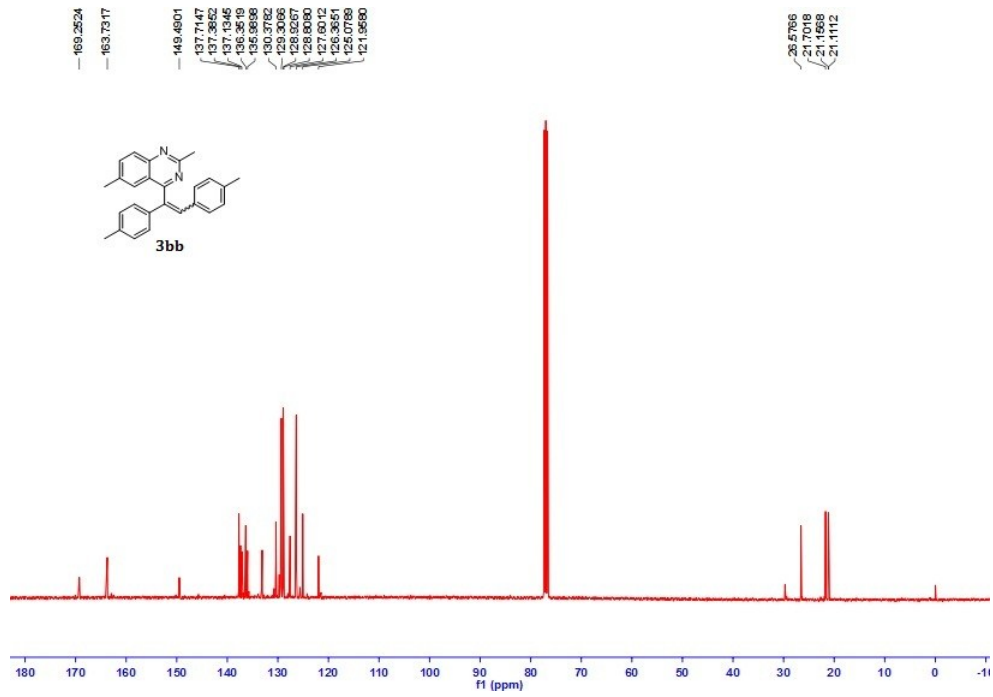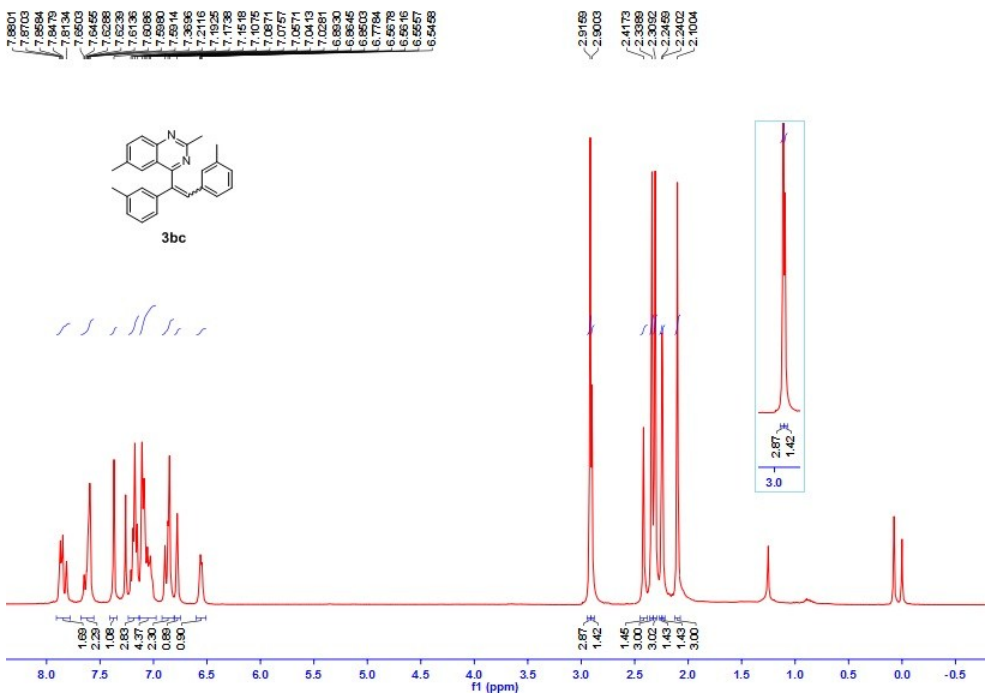

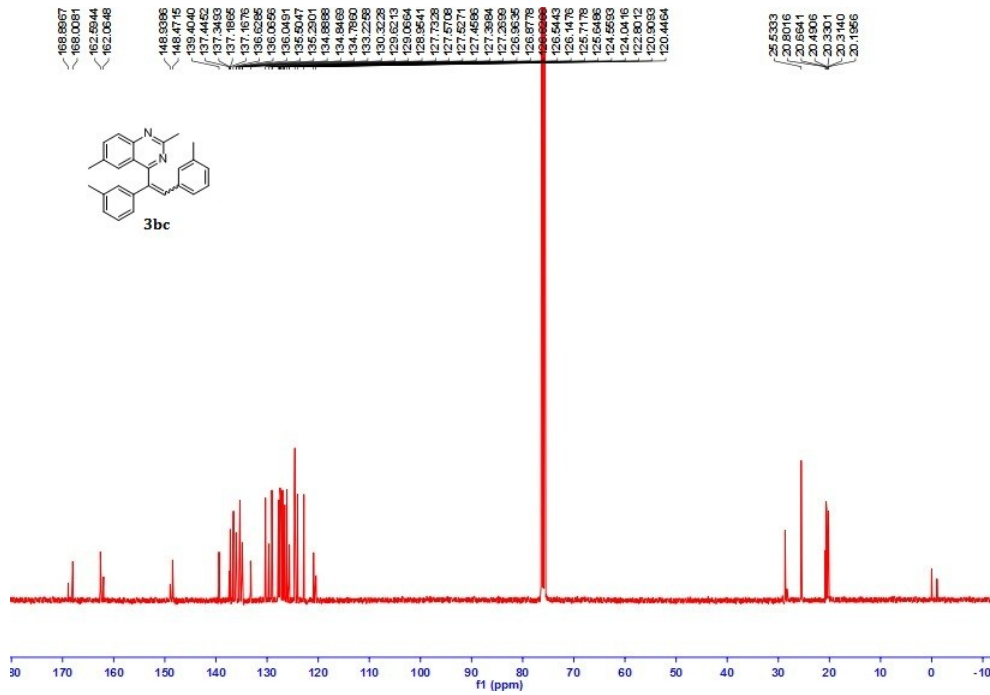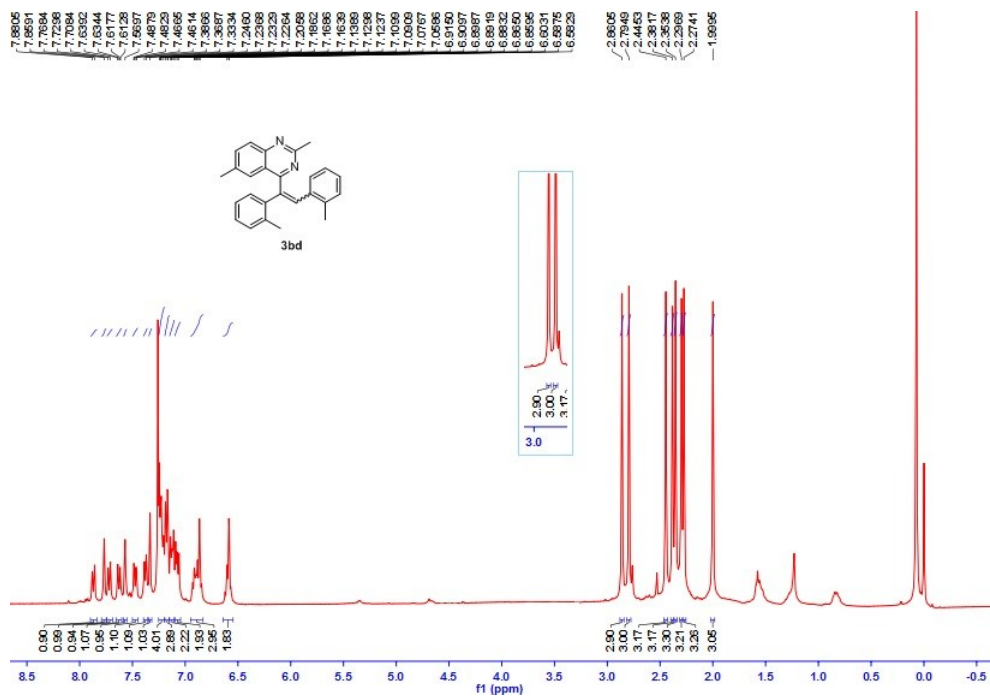

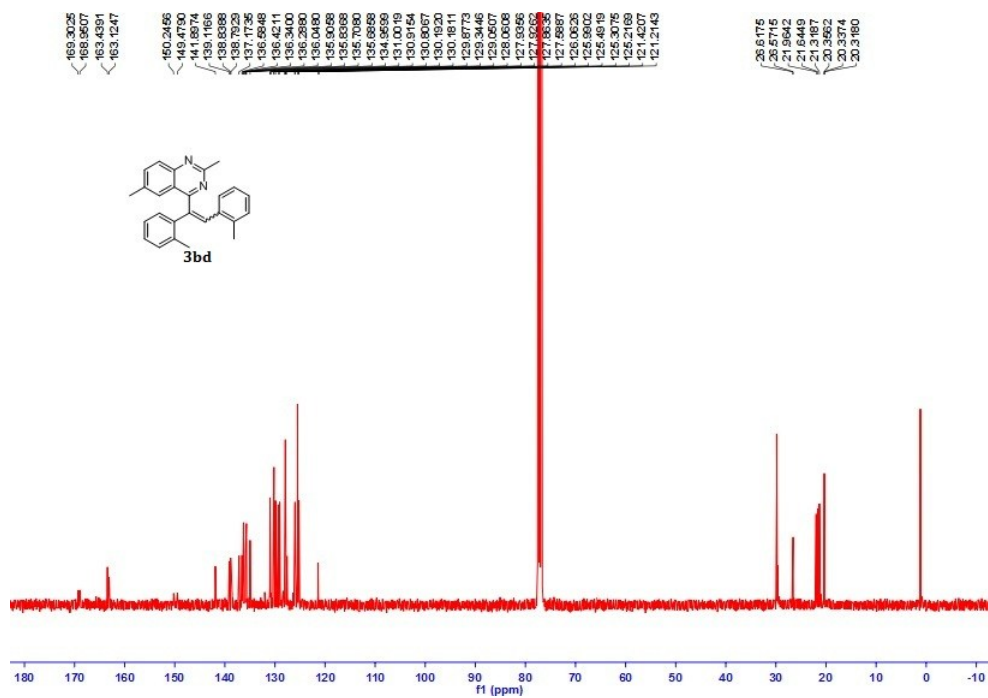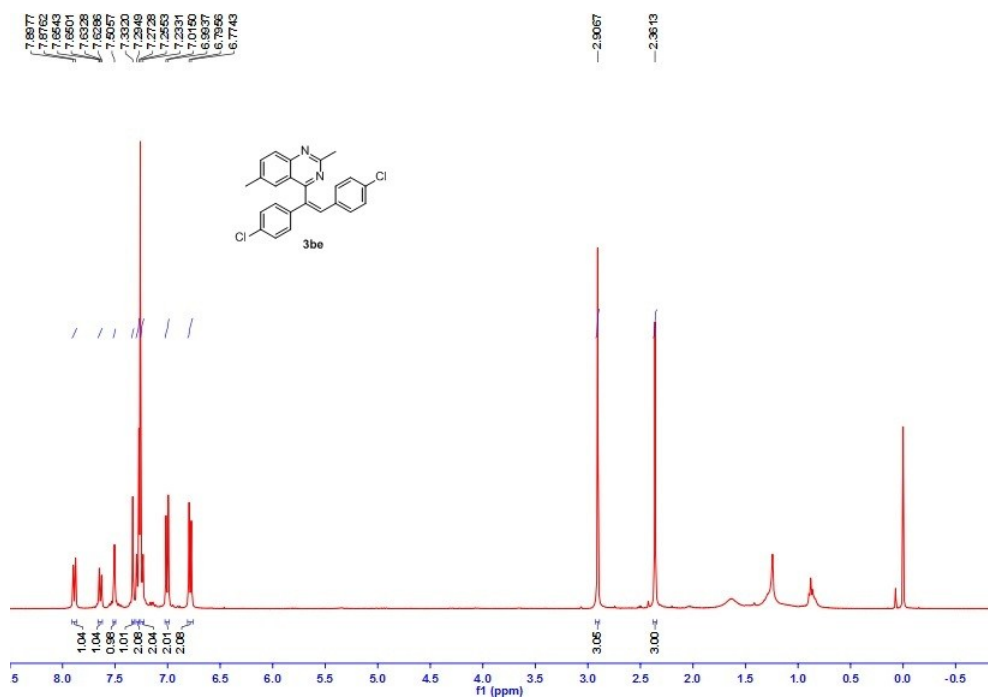

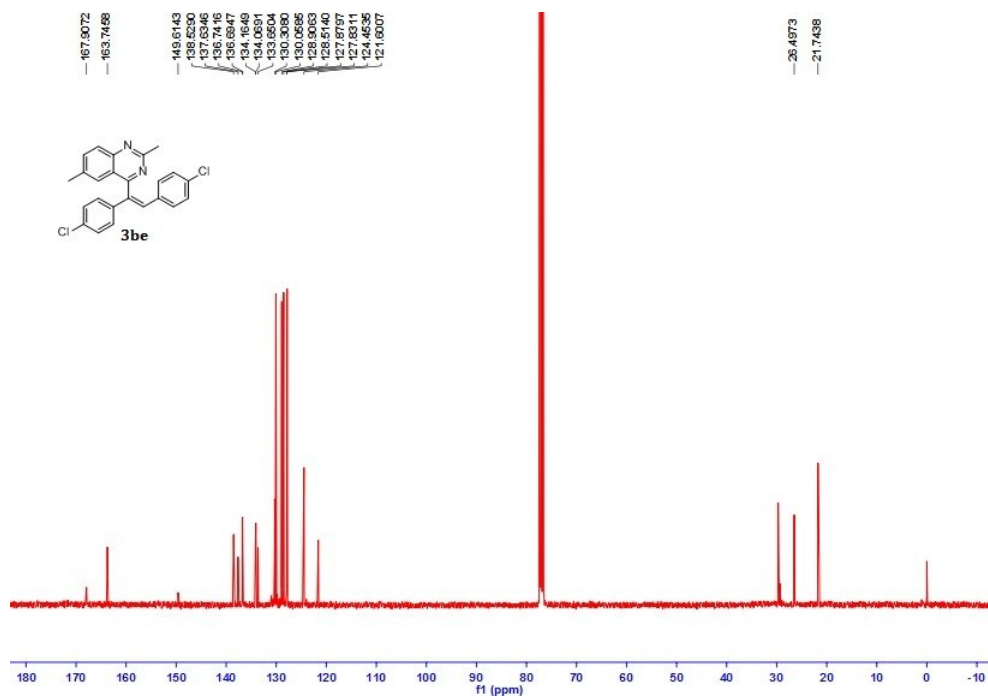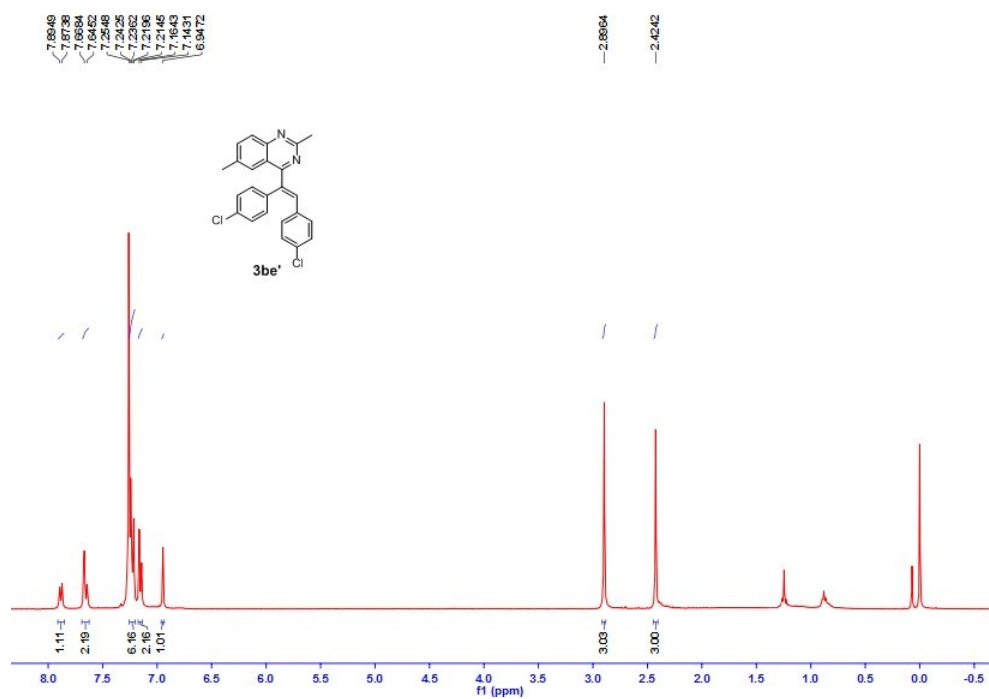



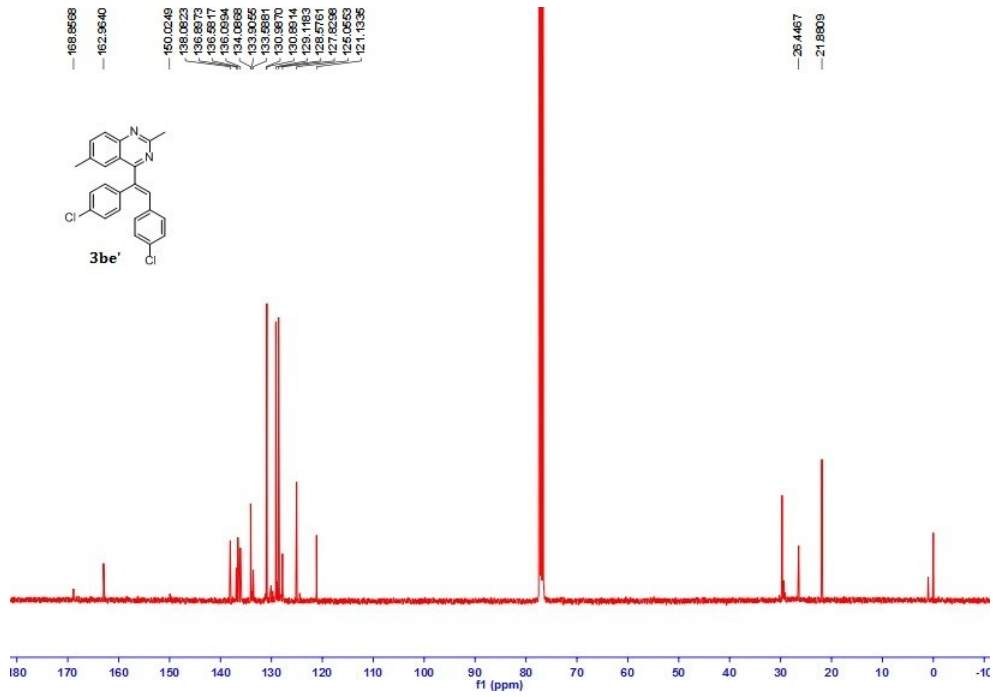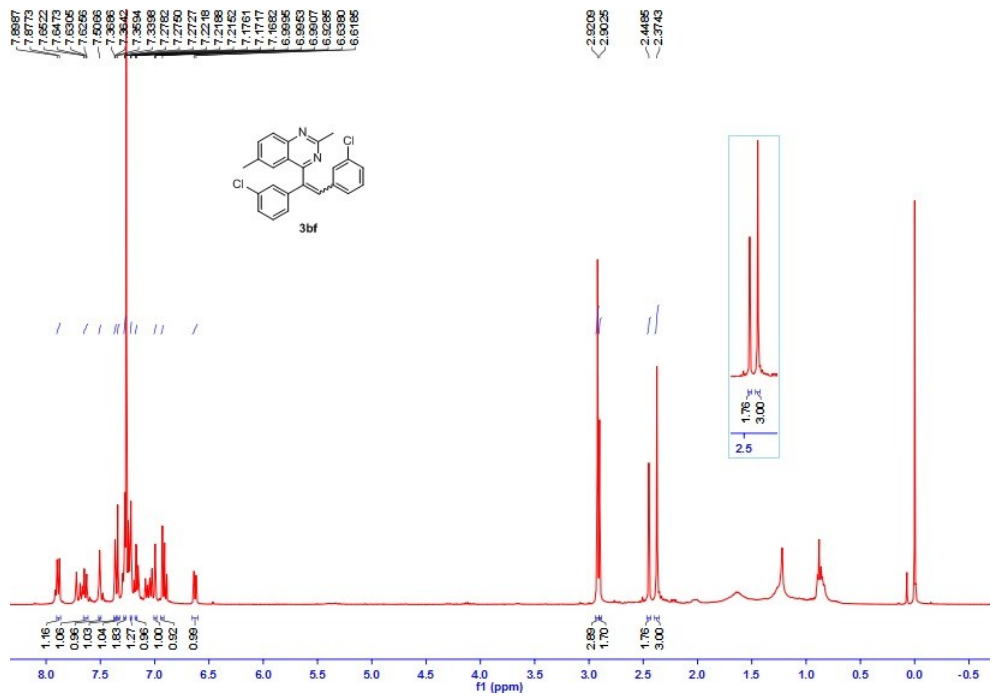

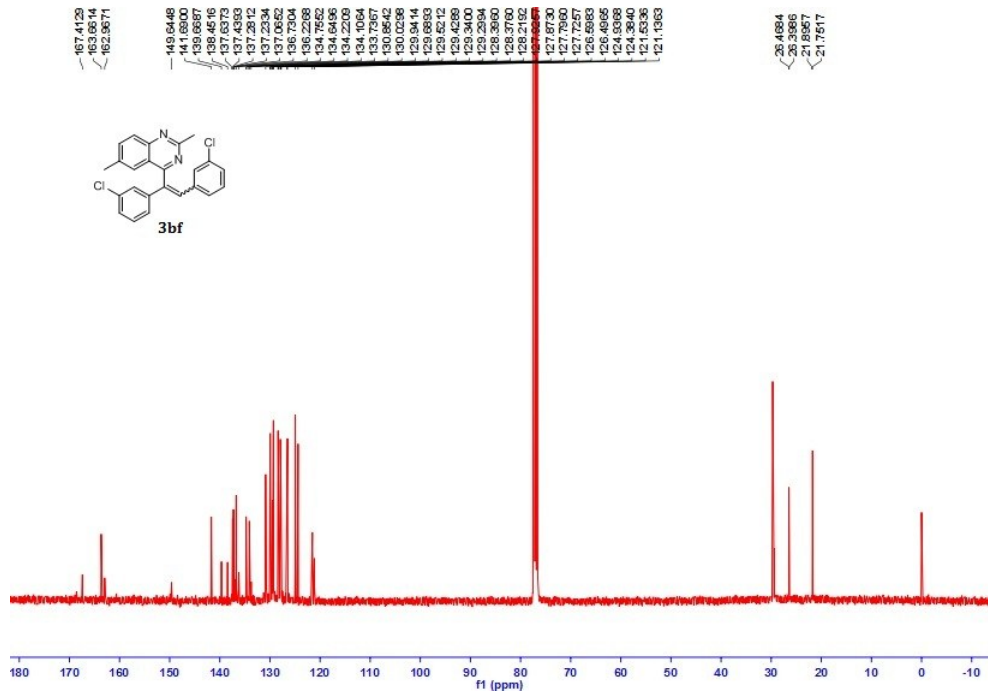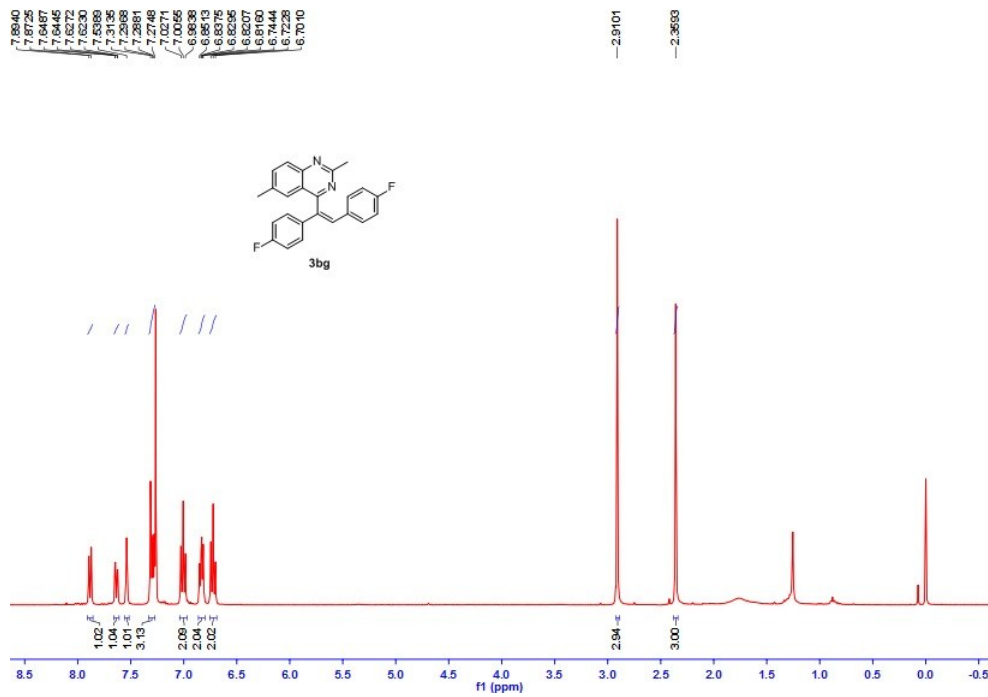

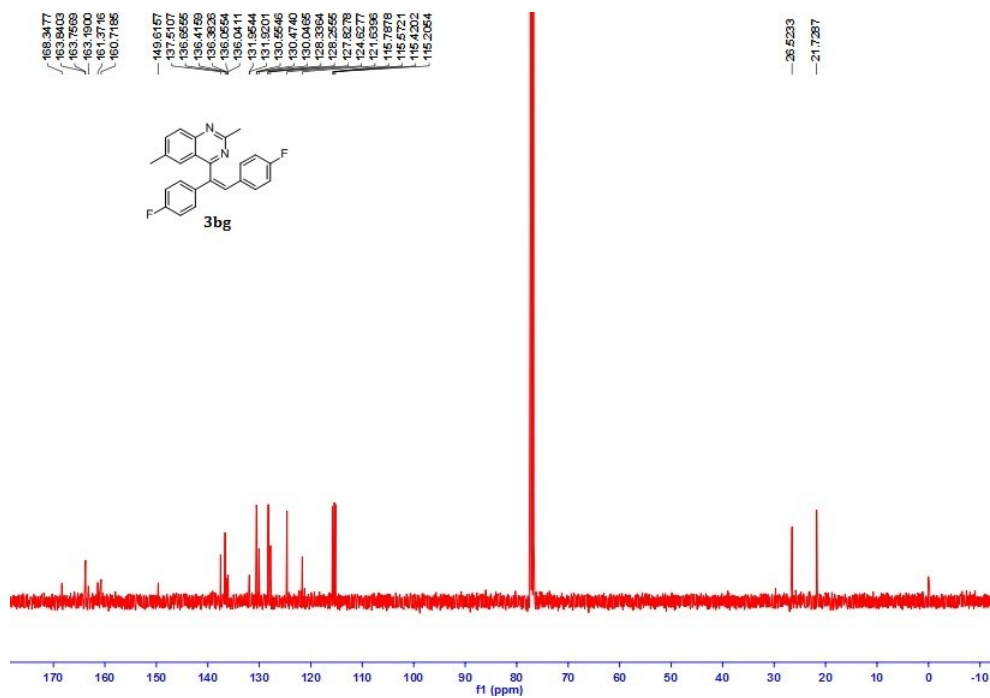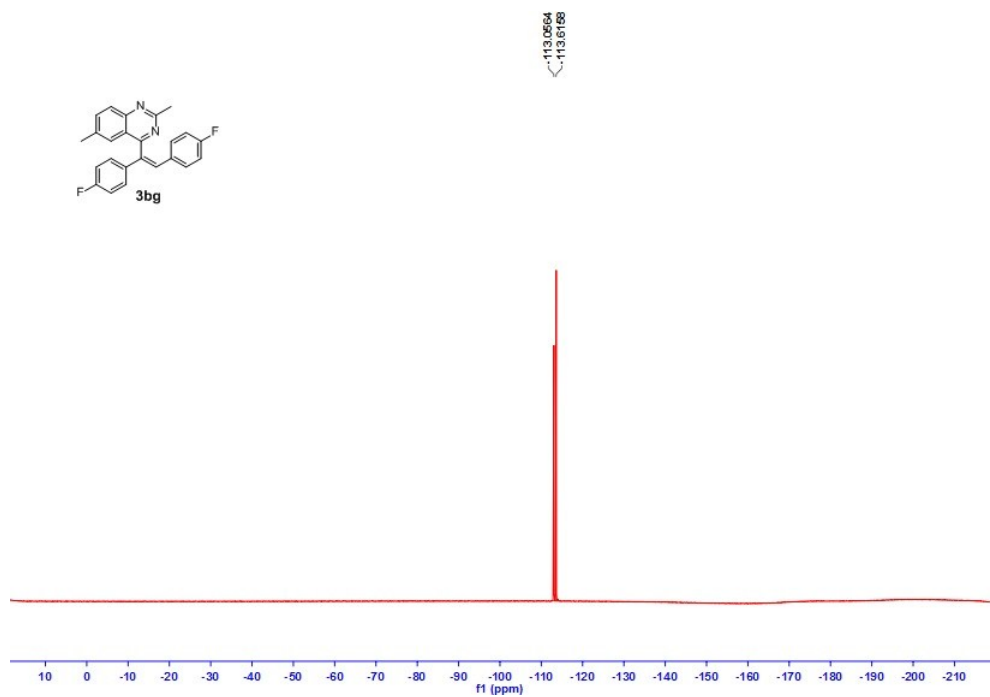

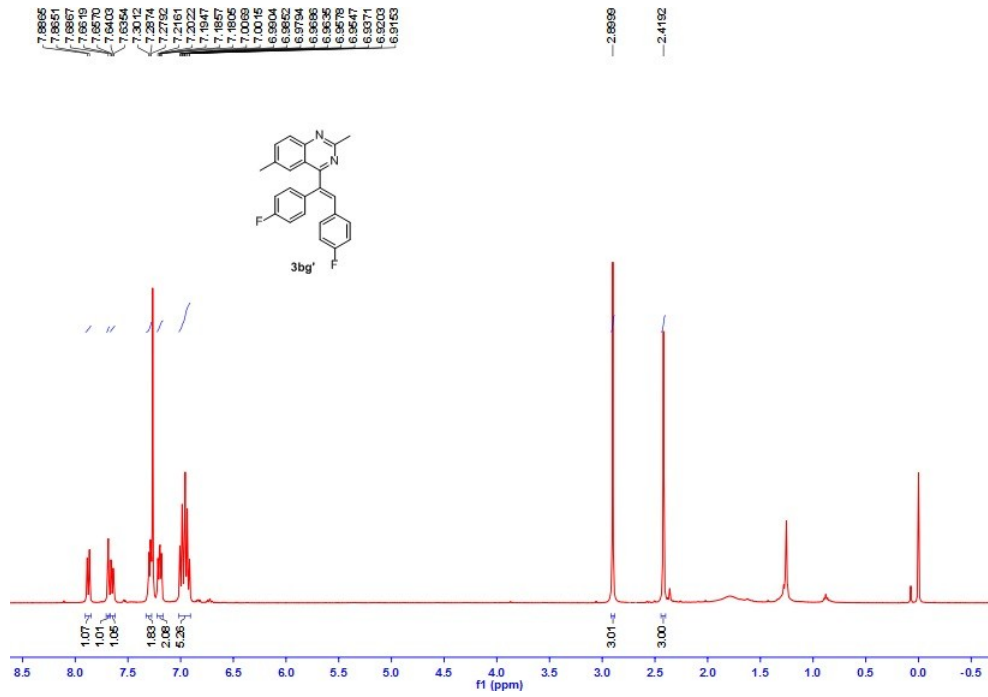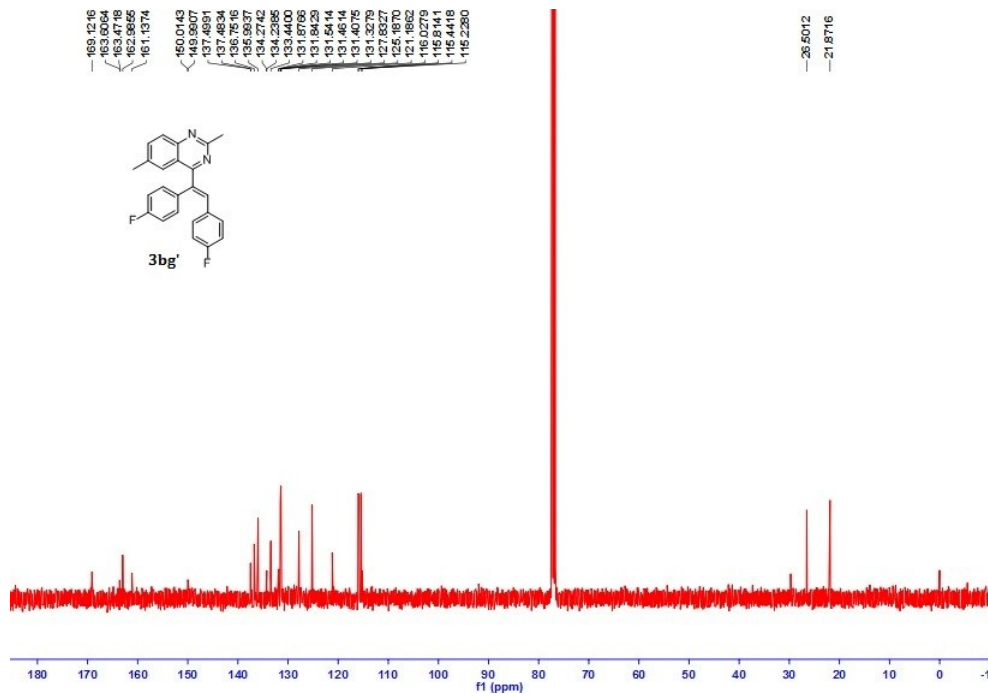

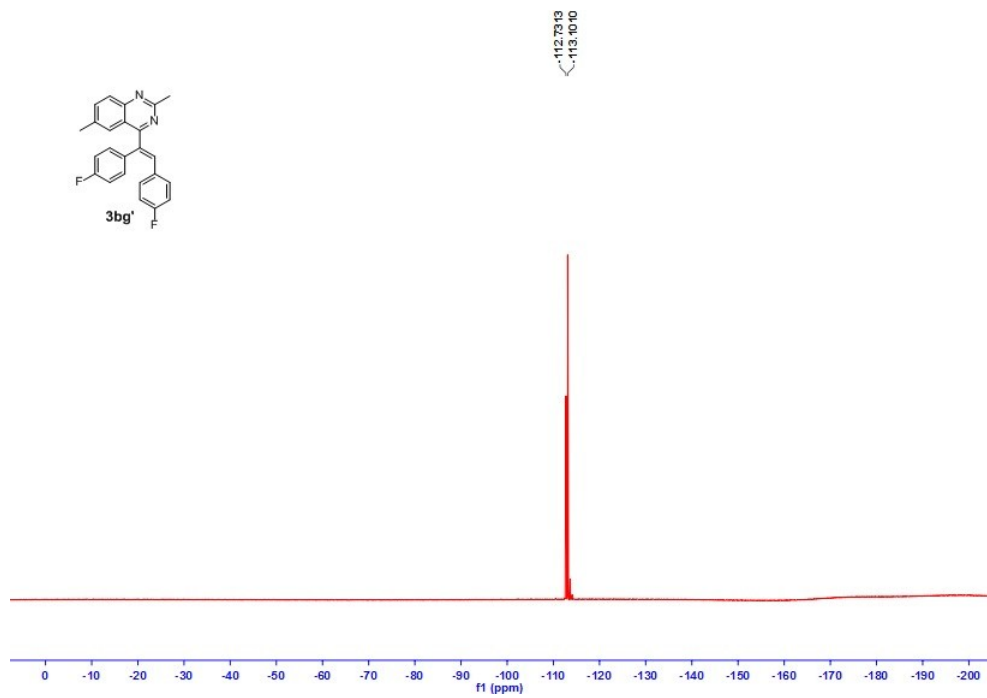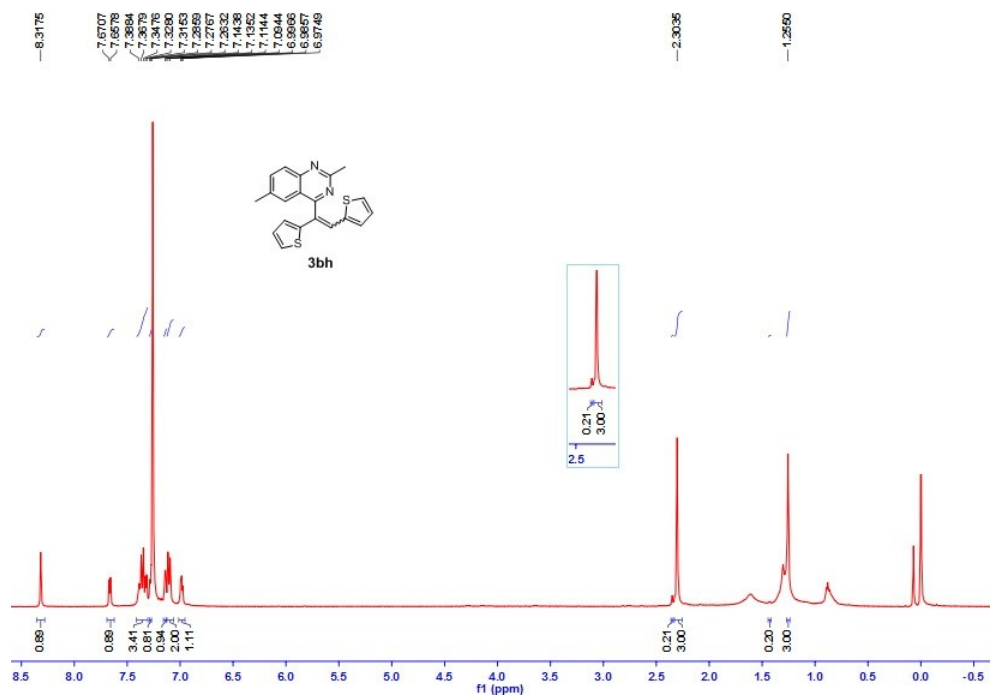

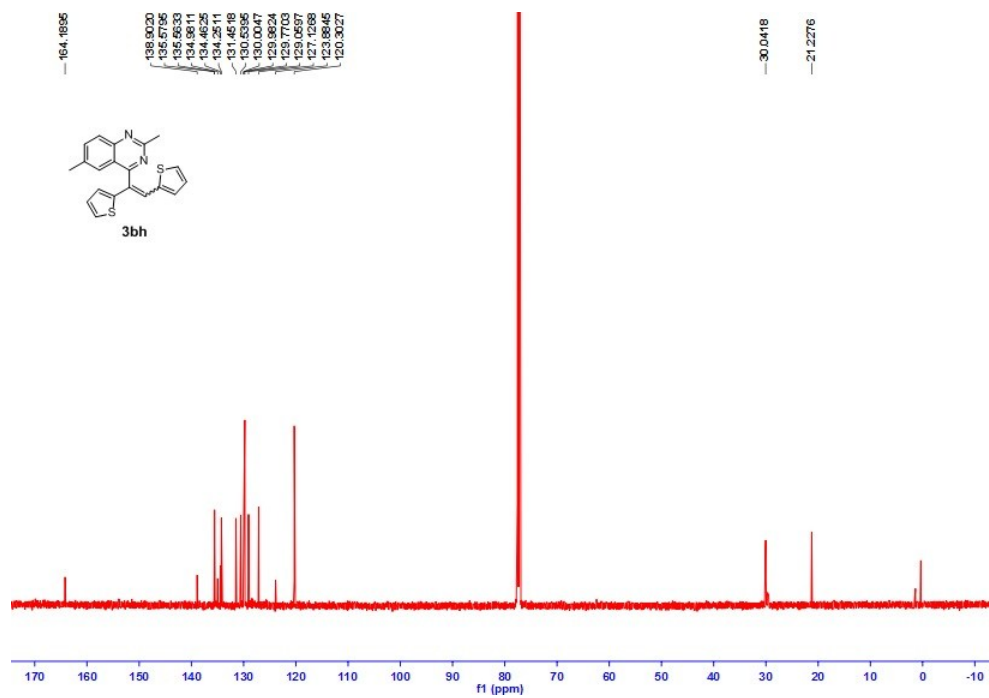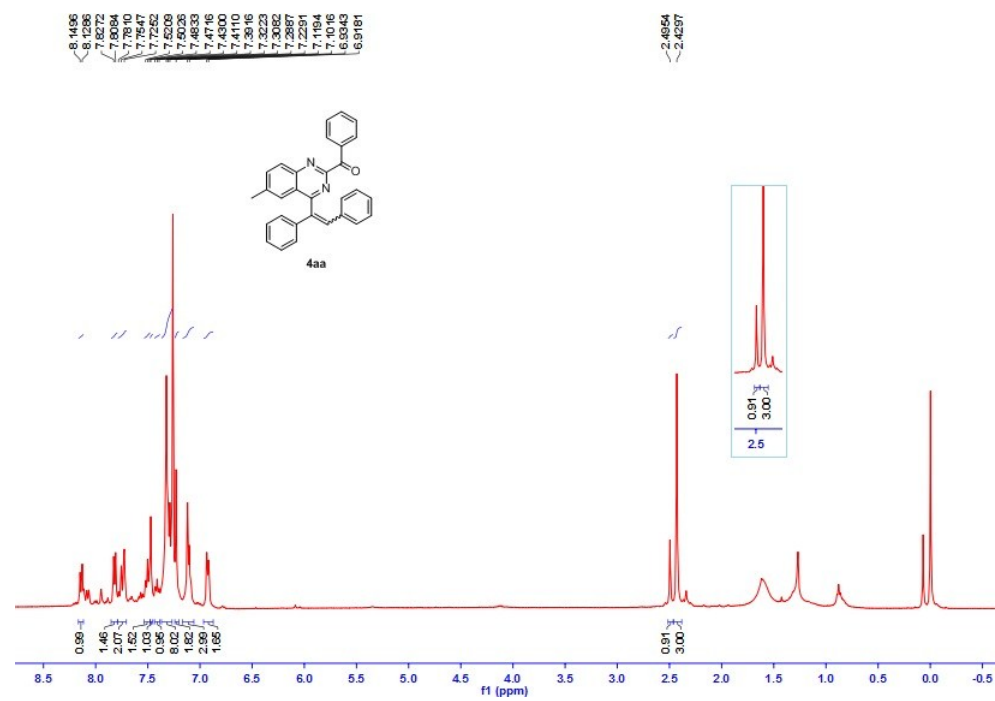

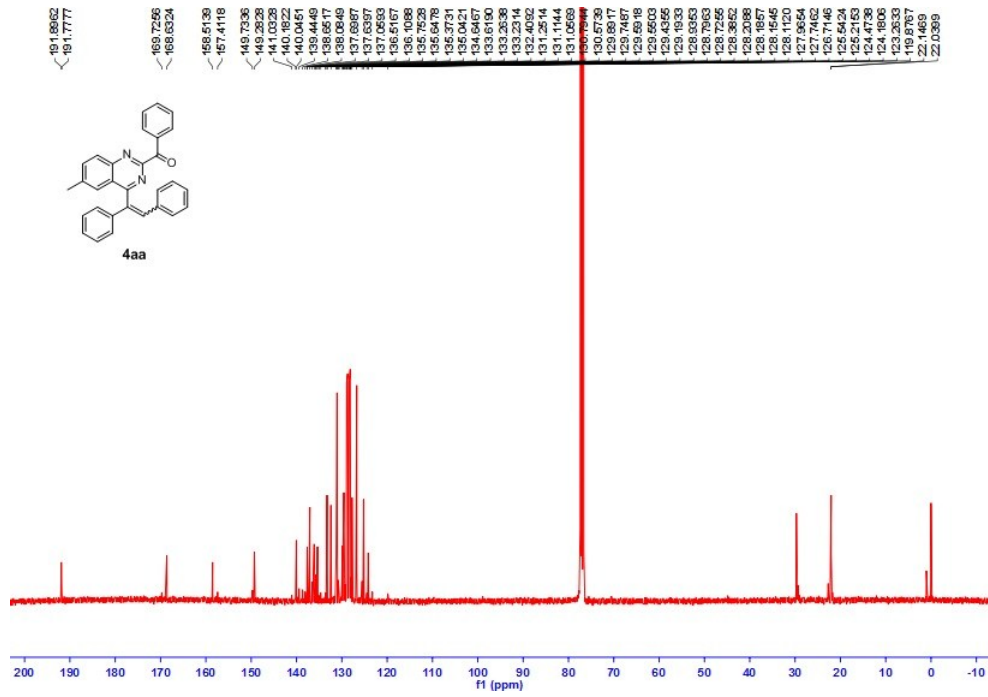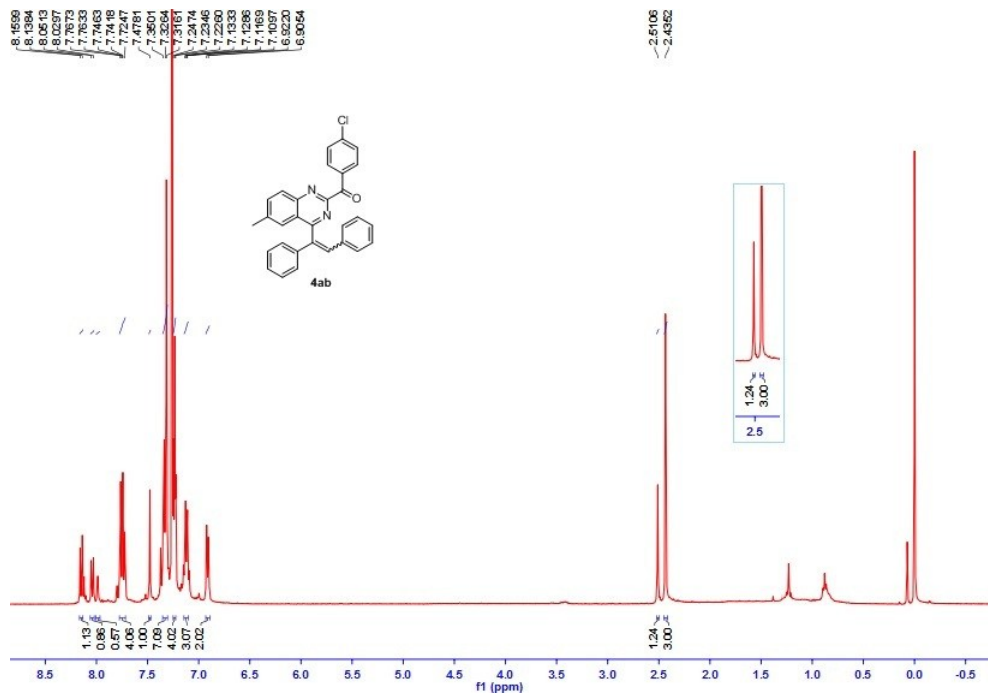

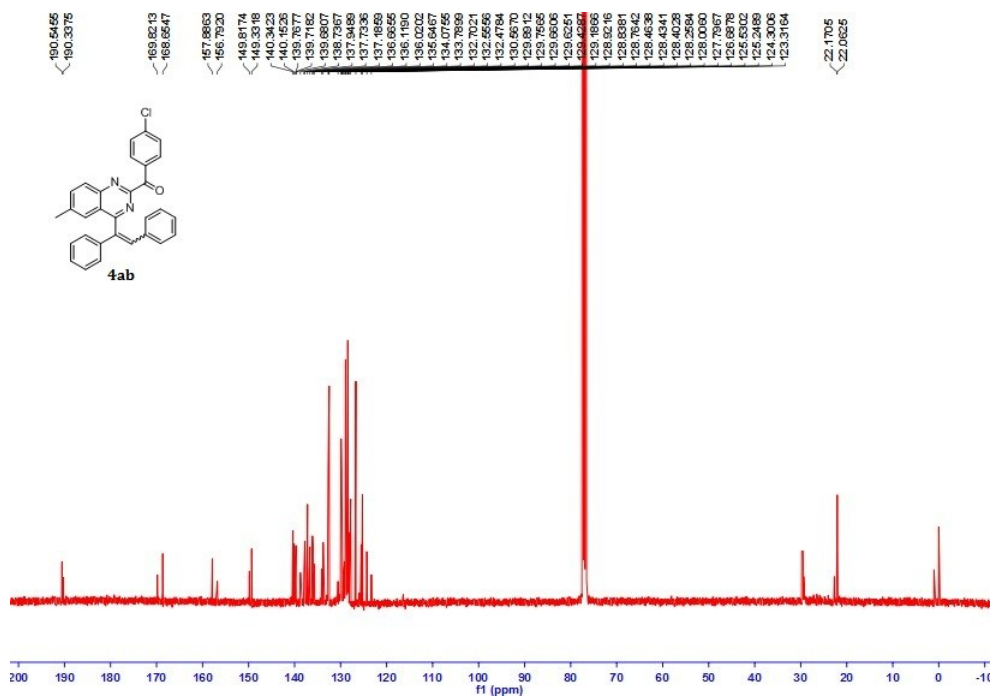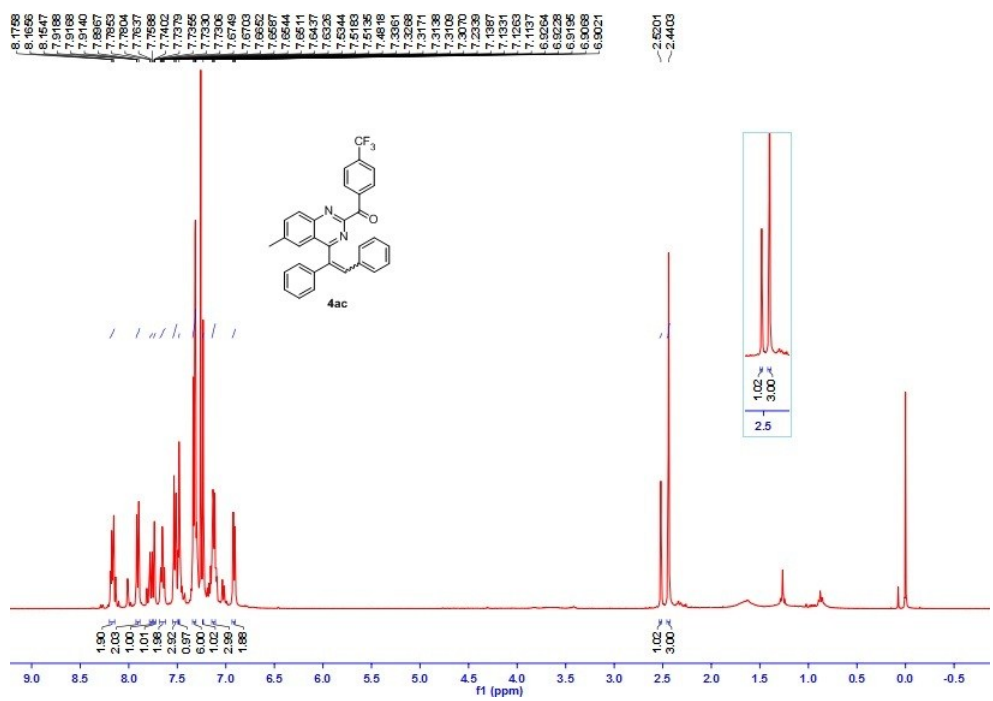



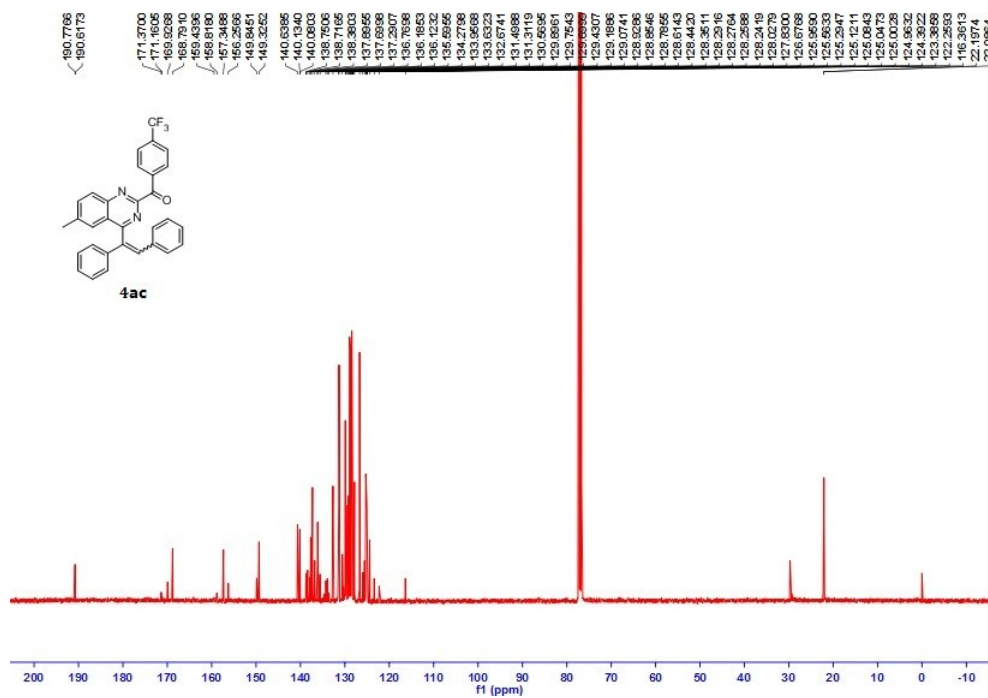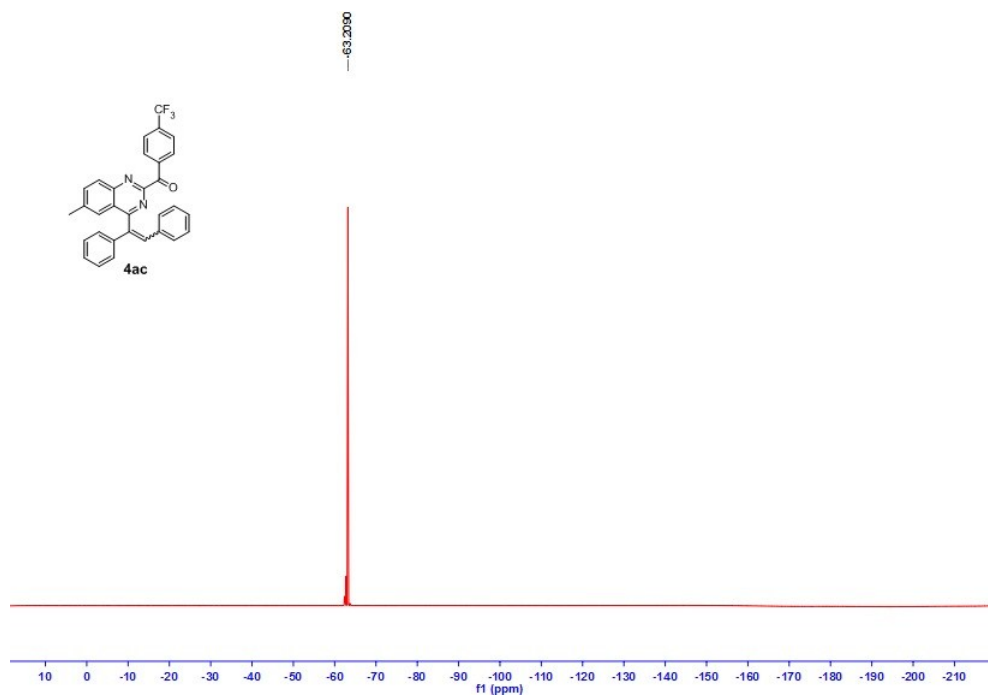

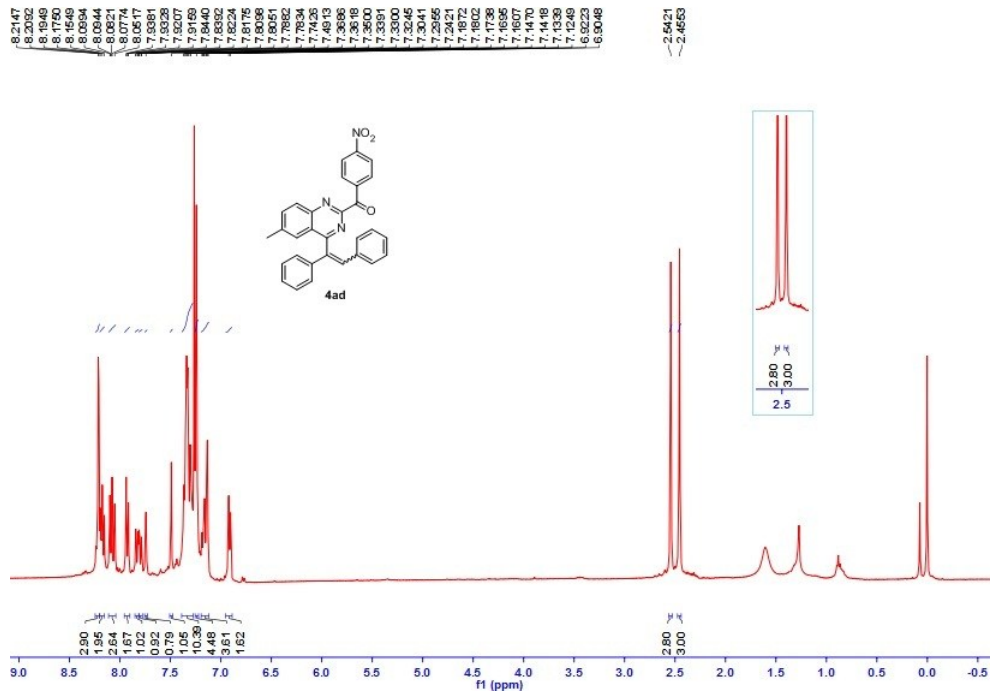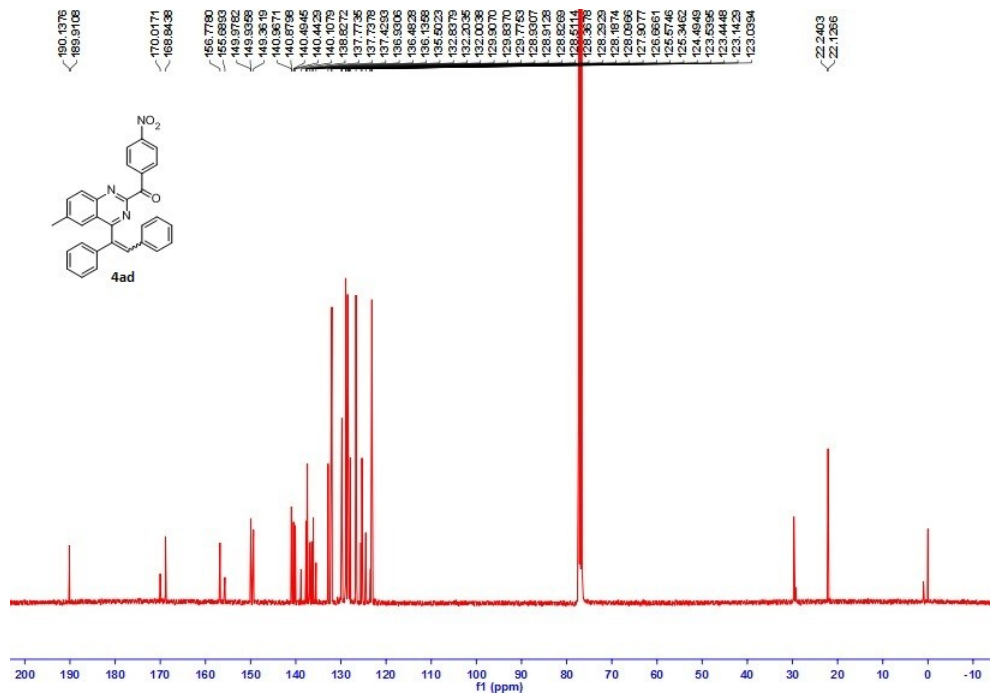

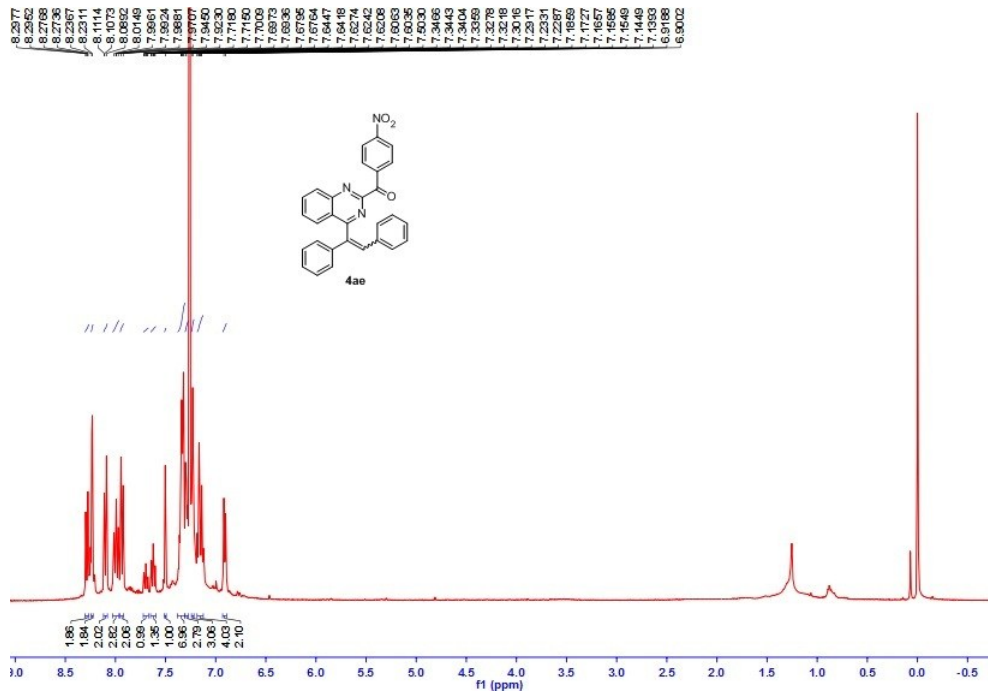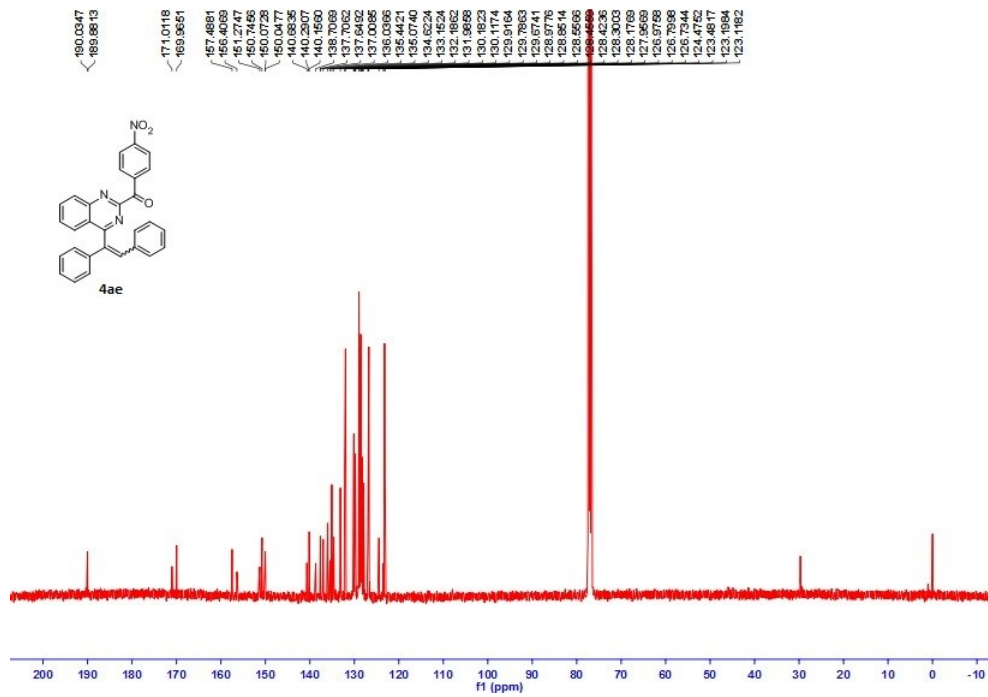

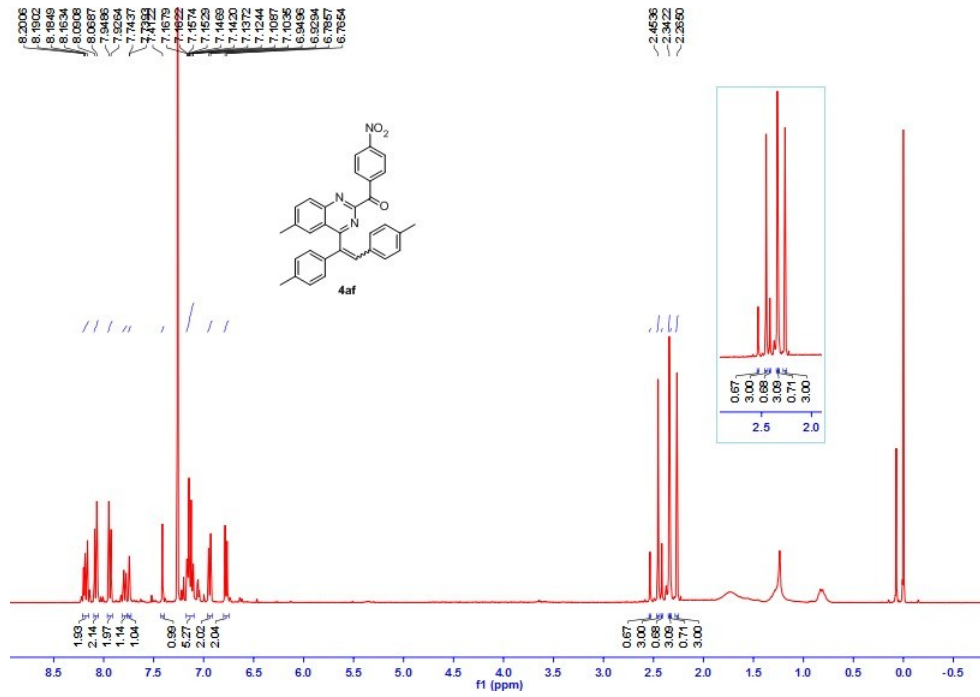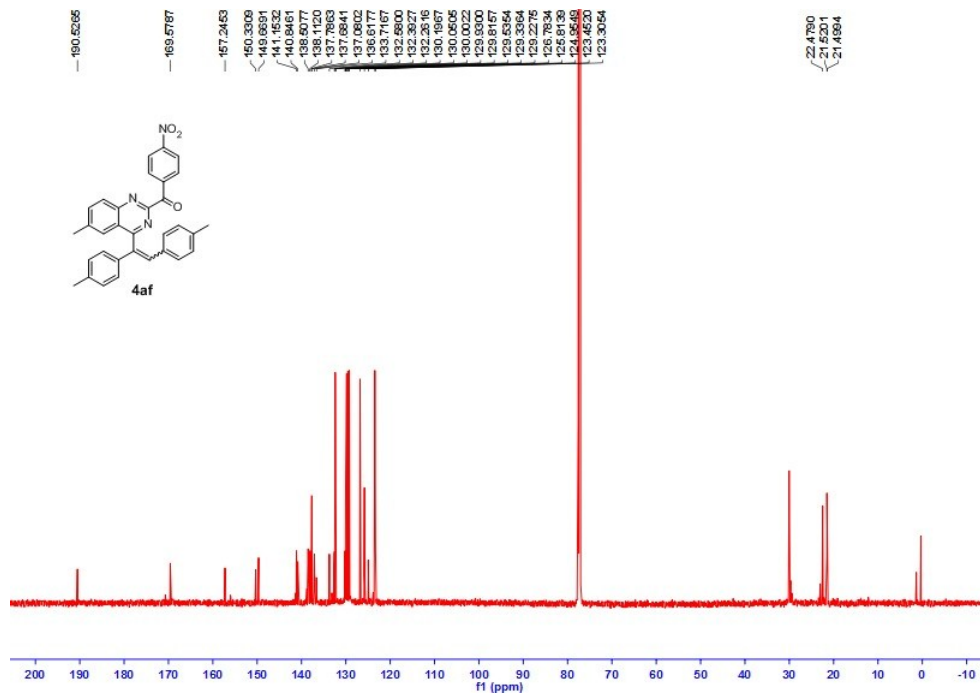

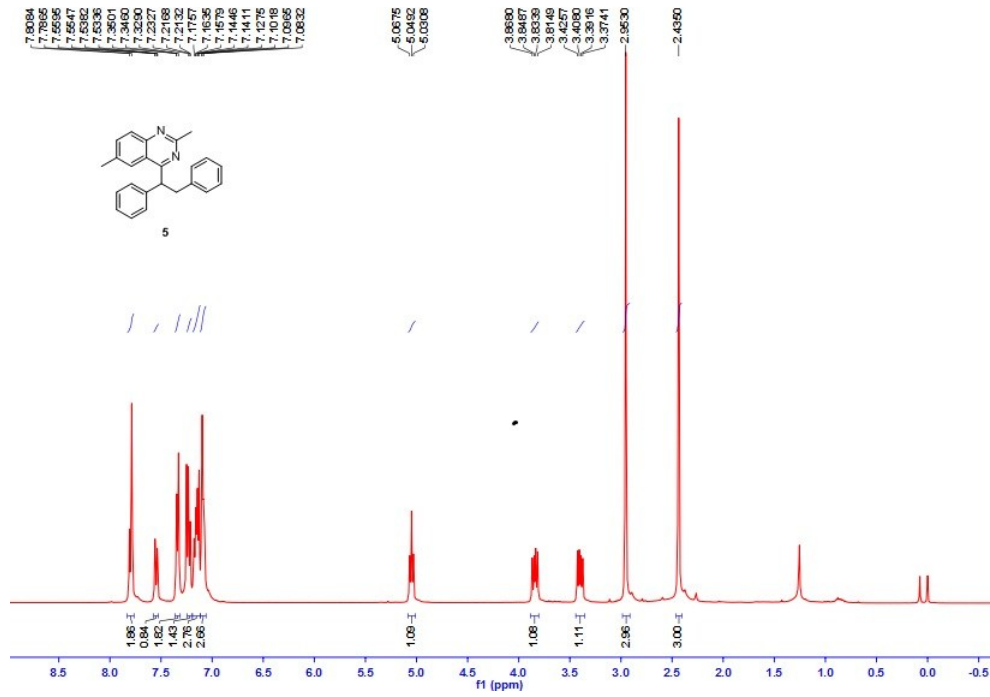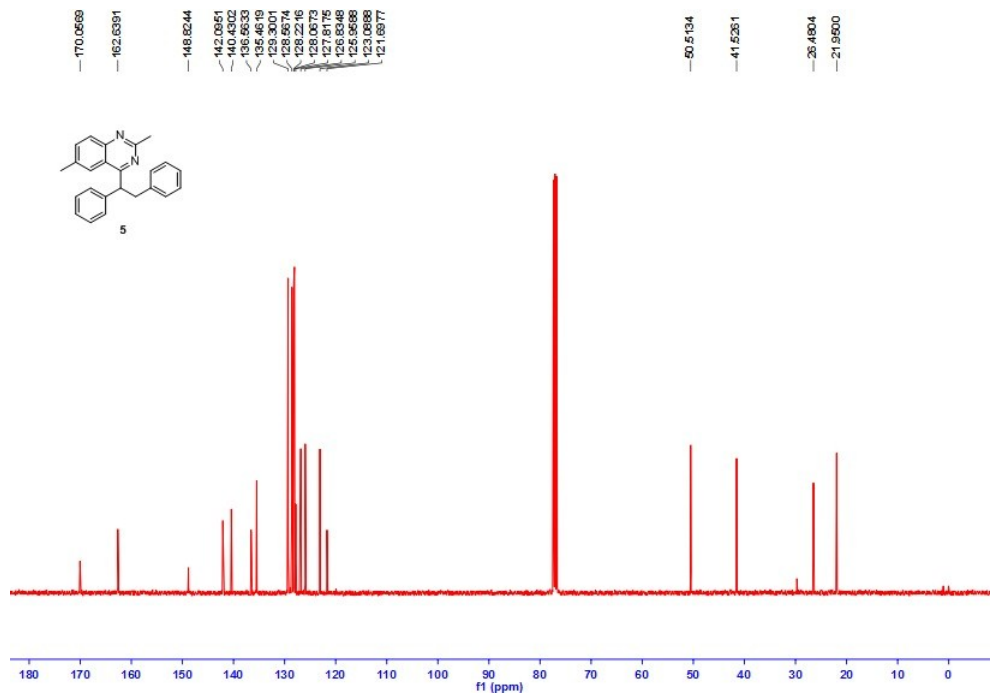

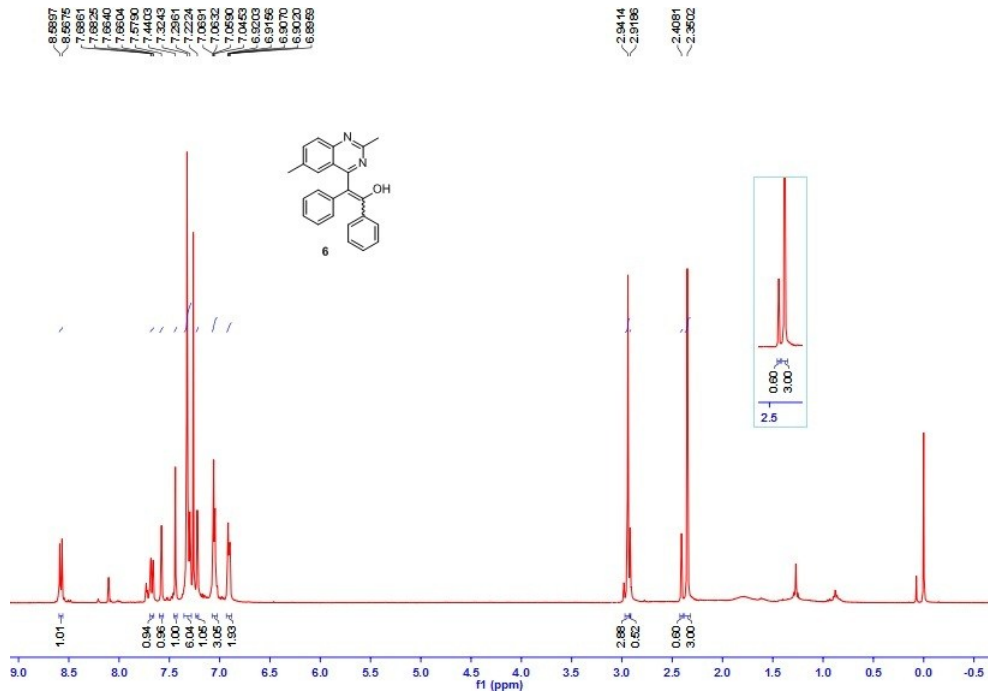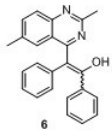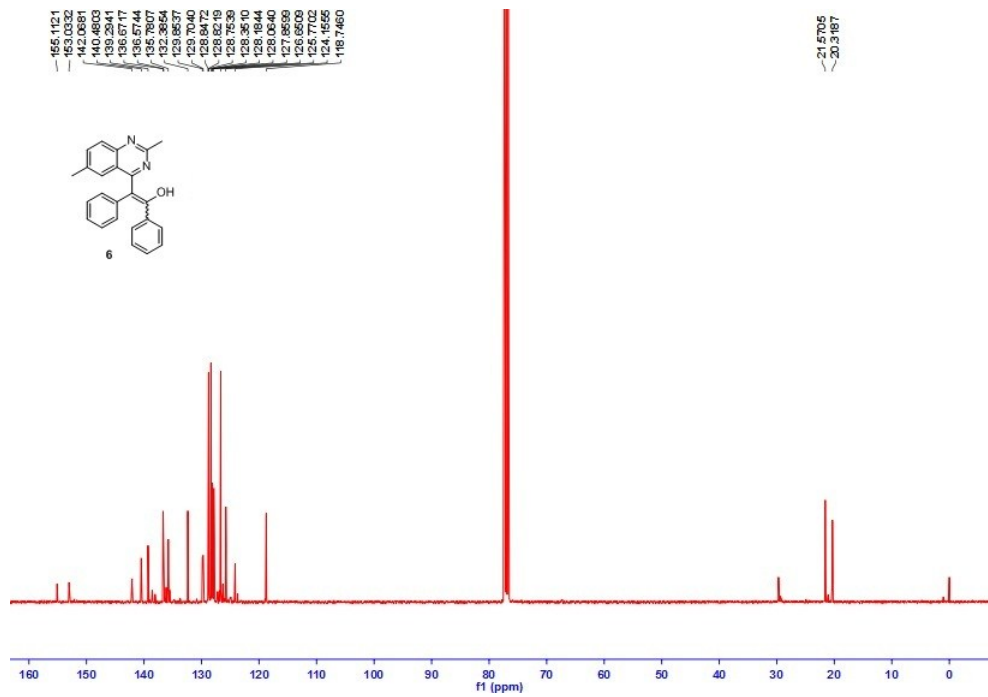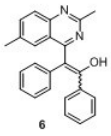

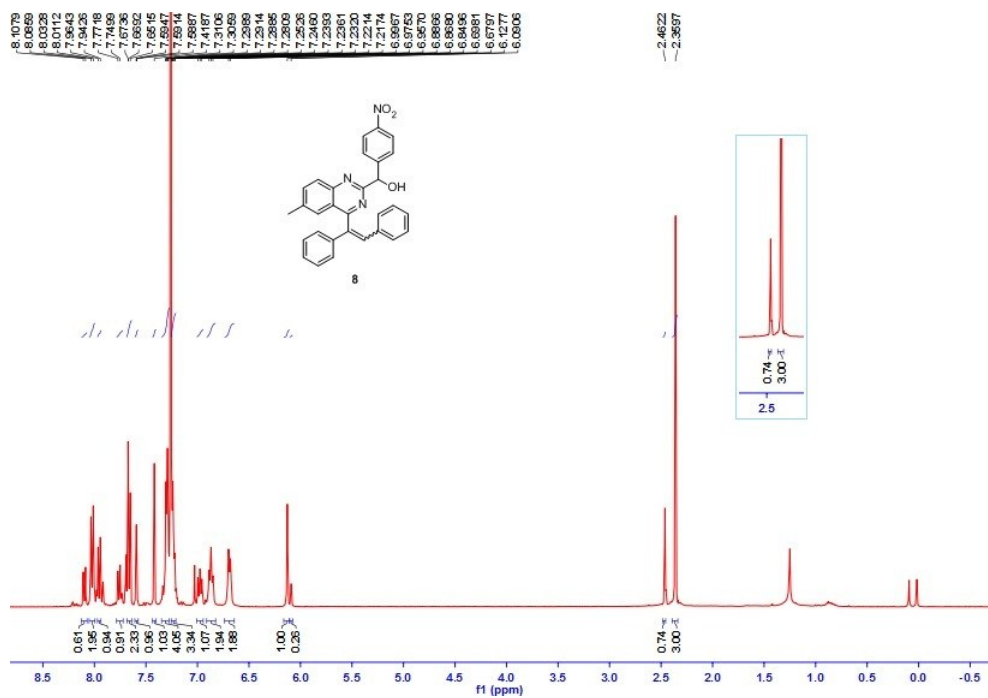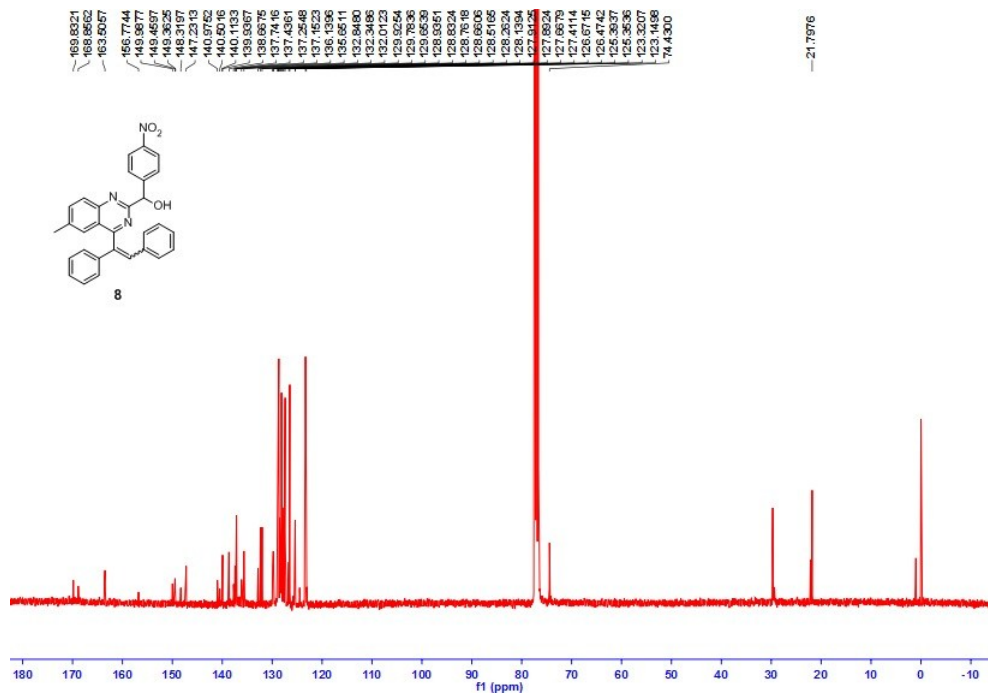

Supplement: c9qo01372e1.pdf [file c9qo01372e1.pdf]
